# Supplementary material for: Assessing Geographic Overlap between Zero-Dose Diphtheria–Tetanus–Pertussis Vaccination Prevalence and Other Health Indicators
Source: Vaccines (Basel). 2023 Apr 5;11(4):802. doi: 10.3390/vaccines11040802 (PMC10144604; doi:10.3390/vaccines11040802)

# Supplemental Materials

## Table of Contents

|                                                                                                                       |                                     |
|-----------------------------------------------------------------------------------------------------------------------|-------------------------------------|
| Supplemental Methods.....                                                                                             | 4                                   |
| 1.1 GATHER compliance.....                                                                                            | 4                                   |
| 1.2 Geospatial modeling .....                                                                                         | 4                                   |
| 1.3 Additional limitations .....                                                                                      | 5                                   |
| 1.4 Supplemental References.....                                                                                      | <b>Error! Bookmark not defined.</b> |
| Supplemental Tables.....                                                                                              | 6                                   |
| Supplemental Table S1: Ten countries with highest no-DTP counts in 2019 and indicator data availability details ..... | 6                                   |
| Supplemental Table S2: Surveys included in DTP modeling.....                                                          | 7                                   |
| Supplemental Table S3: Surveys excluded from DTP modeling.....                                                        | 39                                  |
| Supplemental Table S4: GATHER Compliance checklist.....                                                               | 44                                  |
| Supplemental Table S5: Geospatial covariates used in modeling.....                                                    | 46                                  |
| Supplemental Figures.....                                                                                             | 49                                  |
| Supplemental Figures S1–S23: Country-specific AUC step plots.....                                                     | 49                                  |
| Supplemental Figure S1: Nigeria, U5M .....                                                                            | 50                                  |
| Supplemental Figure S2: Nigeria, missed ITNs.....                                                                     | 51                                  |
| Supplemental Figure S3: Nigeria, missed ORT .....                                                                     | 52                                  |
| Supplemental Figure S4: Nigeria, LF .....                                                                             | 53                                  |
| Supplemental Figure S5: Angola, stunting .....                                                                        | 54                                  |
| Supplemental Figure S6: Angola, U5M.....                                                                              | 55                                  |
| Supplemental Figure S7: Angola, missed ITNs.....                                                                      | 56                                  |
| Supplemental Figure S8: Angola, missed ORT .....                                                                      | 57                                  |
| Supplemental Figure S9: Angola, LF .....                                                                              | 58                                  |
| Supplemental Figure S10: DRC, stunting.....                                                                           | 59                                  |
| Supplemental Figure S11: DRC, U5M .....                                                                               | 60                                  |
| Supplemental Figure S12: DRC, missed ITNs .....                                                                       | 61                                  |
| Supplemental Figure S13: DRC, missed ORT.....                                                                         | 62                                  |
| Supplemental Figure S14: DRC, LF .....                                                                                | 63                                  |
| Supplemental Figure S15: Ethiopia, stunting.....                                                                      | 64                                  |
| Supplemental Figure S16: Ethiopia, U5M.....                                                                           | 65                                  |
| Supplemental Figure S17: Ethiopia, missed ITNs .....                                                                  | 66                                  |

|                                                                               |     |
|-------------------------------------------------------------------------------|-----|
| Supplemental Figure S18: Ethiopia, missed ORT .....                           | 67  |
| Supplemental Figure S19: Ethiopia, LF.....                                    | 68  |
| Supplemental Figure S20: Indonesia, stunting.....                             | 69  |
| Supplemental Figure S21: Indonesia, U5M.....                                  | 70  |
| Supplemental Figure S22: Indonesia, missed ORT .....                          | 71  |
| Supplemental Figure S23: Indonesia, LF.....                                   | 72  |
| Supplemental Figures S24–S46: Country-specific, all quartile overlap. ....    | 73  |
| Supplemental Figure S24 Nigeria, U5M.....                                     | 74  |
| Supplemental Figure S25: Nigeria, missed ITNs.....                            | 75  |
| Supplemental Figure S26: Nigeria, missed ORT .....                            | 76  |
| Supplemental Figure S27: Nigeria, LF .....                                    | 77  |
| Supplemental Figure S28: Angola, stunting .....                               | 78  |
| Supplemental Figure S29: Angola, U5M.....                                     | 79  |
| Supplemental Figure S30: Angola, missed ORT .....                             | 80  |
| Supplemental Figure S31: Angola, missed ITNs.....                             | 81  |
| Supplemental Figure S32: Angola, LF .....                                     | 82  |
| Supplemental Figure S33: DRC, stunting.....                                   | 83  |
| Supplemental Figure S34: DRC, U5M .....                                       | 84  |
| Supplemental Figure S35: DRC, missed ITNs .....                               | 85  |
| Supplemental Figure S36: DRC, missed ORT.....                                 | 86  |
| Supplemental Figure S37: DRC, LF .....                                        | 87  |
| Supplemental Figure S38: Ethiopia, stunting.....                              | 88  |
| Supplemental Figure S39: Ethiopia, U5M.....                                   | 89  |
| Supplemental Figure S40: Ethiopia, missed ITNs .....                          | 90  |
| Supplemental Figure S41: Ethiopia, missed ORT .....                           | 91  |
| Supplemental Figure S42: Ethiopia, LF.....                                    | 92  |
| Supplemental Figure S43: Indonesia, stunting.....                             | 93  |
| Supplemental Figure S44: Indonesia, U5M.....                                  | 94  |
| Supplemental Figure S45: Indonesia, missed ORT .....                          | 95  |
| Supplemental Figure S46: Indonesia, LF.....                                   | 96  |
| Supplemental Figures S47–S69: Country-specific, highest quartile overlap..... | 97  |
| Supplemental Figure S47: Nigeria, U5M .....                                   | 97  |
| Supplemental Figure S48: Nigeria, missed ITNs.....                            | 98  |
| Supplemental Figure S49: Nigeria, missed ORT .....                            | 99  |
| Supplemental Figure S50: Nigeria, LF .....                                    | 100 |

|                                                                                                   |     |
|---------------------------------------------------------------------------------------------------|-----|
| Supplemental Figure S51: Angola, stunting .....                                                   | 101 |
| Supplemental Figure S52: Angola, U5M.....                                                         | 102 |
| Supplemental Figure S53: Angola, missed ITNs.....                                                 | 103 |
| Supplemental Figure S54: Angola, missed ORT .....                                                 | 104 |
| Supplemental Figure S55: Angola, LF .....                                                         | 105 |
| Supplemental Figure S56: DRC, stunting.....                                                       | 106 |
| Supplemental Figure S57: DRC, U5M .....                                                           | 107 |
| Supplemental Figure S58: DRC, missed ITNs .....                                                   | 108 |
| Supplemental Figure S59: DRC, missed ORT.....                                                     | 109 |
| Supplemental Figure S60: DRC, LF .....                                                            | 110 |
| Supplemental Figure S61: Ethiopia, stunting.....                                                  | 111 |
| Supplemental Figure S62: Ethiopia, U5M.....                                                       | 112 |
| Supplemental Figure S63: Ethiopia, missed ITNs .....                                              | 113 |
| Supplemental Figure S64: Ethiopia, missed ORT .....                                               | 114 |
| Supplemental Figure S65: Ethiopia, LF.....                                                        | 115 |
| Supplemental Figure S66: Indonesia, stunting.....                                                 | 116 |
| Supplemental Figure S67: Indonesia, U5M.....                                                      | 117 |
| Supplemental Figure S68: Indonesia, missed ORT .....                                              | 118 |
| Supplemental Figure S69: Indonesia, LF.....                                                       | 119 |
| Supplemental Figures S70–S73: Multi-indicator overlap of country-specific highest quartiles. .... | 120 |
| Supplemental Figure S70: Angola .....                                                             | 120 |
| Supplemental Figure S71: DRC.....                                                                 | 121 |
| Supplemental Figure S72: Ethiopia .....                                                           | 122 |
| Supplemental Figure S73: Indonesia .....                                                          | 123 |
| Supplemental Figures S74–S77: Multinational all quartile overlap by prevalence. ....              | 124 |
| Supplemental Figure S74: U5M .....                                                                | 124 |
| Supplemental Figure S75: Missed ITNs .....                                                        | 125 |
| Supplemental Figure S76: Missed ORT .....                                                         | 126 |
| Supplemental Figure S77: LF .....                                                                 | 127 |
| Supplemental Figures S78–S81: Multinational highest quartile overlap by prevalence.....           | 128 |
| Supplemental Figure S78: U5M .....                                                                | 128 |
| Supplemental Figure S79: Missed ITNs .....                                                        | 129 |
| Supplemental Figure S80: Missed ORT .....                                                         | 130 |
| Supplemental Figure S81: LF .....                                                                 | 131 |
| Supplemental Figures S82–S85: Multinational all quartile overlap by counts.....                   | 132 |

|                                                                                      |     |
|--------------------------------------------------------------------------------------|-----|
| Supplemental Figure S82: U5M .....                                                   | 132 |
| Supplemental Figure S83: Missed ITNs .....                                           | 133 |
| Supplemental Figure S84: Missed ORT .....                                            | 134 |
| Supplemental Figure S85: LF .....                                                    | 135 |
| Supplemental Figures S86–S89: Multinational highest quartile overlap by counts. .... | 136 |
| Supplemental Figure S86: U5M .....                                                   | 136 |
| Supplemental Figure S87: Missed ITNs .....                                           | 137 |
| Supplemental Figure S88: Missed ORT .....                                            | 138 |
| Supplemental Figure S89: LF .....                                                    | 139 |

## Supplemental Methods

### 1.1 GATHER compliance

Refer to Supplemental Table S4 for information on how this study meets GATHER compliance criteria [49].

### 1.2 Geospatial modeling

Portions of this section of the Supplemental Methods have been adapted from the methods sections and supplementary materials in Mosser *et al.* [17] and Sbarra *et al.* [18]. The geospatial model used here to produce estimates of the proportion of children aged 12-23 months who have not received any doses of diphtheria-tetanus-pertussis-containing vaccine (no-DTP) expands upon methods previously used to map DTP coverage in Africa [17]. Here, we have included additional surveys made available since this prior publication for each country included in the analysis (as well as surrounding countries), while also extending the annual time series through 2019. In brief, this model uses a Bayesian continuation ratio ordinal regression model-based geostatistical framework to produce spatiotemporal estimates of dose-specific DTP coverage under the assumption that coverage is similar in location-years that have similar covariate patterns and that are close together in space and time. To estimate coverage for the first dose of DTP (DTP1), we used a continuation ratio ordinal regression approach, whereby we first modelled coverage for the third dose of DTP (DTP3), as well as coverage of DTP1 or DTP2 conditional on having not received DTP3 (DTP1,2<sub>cond</sub>). DTP1 coverage was then calculated as:

$$\text{DTP1} = \text{DTP1,2}_{\text{cond}} * (1 - \text{DTP3}) + \text{DTP3}$$

This method leverages all available DTP data and allows for internal consistency between DTP1 and DTP3 estimates at the draw level.

Along with the survey data, twenty-six geospatial covariates were selected for inclusion via a Variance Inflation Factor (VIF) algorithm to ensure a lack of collinearity [50] (Supplemental Table S5). Covariate selection was optimized per region. As previously, four national level covariates also included in the model: lag-distributed income, prevalence of the completion of the fourth antenatal care visit among pregnant women, mortality due to war and terror, and bias-adjusted national-level administrative coverage.

To allow for complex and non-linear interactions, we used a stacked ensemble modeling approach. Three child models – generalized additive models, lasso regression, and boosted regression trees – were first used to model covariate relationships and predict possible surfaces of dose-specific coverage probabilities. Then, we modelled the probability of dose-specific vaccination using a hierarchical logistic Bayesian geostatistical model. This model accounted for variation in coverage due to spatial and temporal correlation, as well as covariate patterns derived from the stacking child models. This second-step Bayesian geostatistical model used a generalized linear regression in binomial space with a logit link. A correlated spatiotemporal error term was modelled via a three-dimensional spatiotemporal Gaussian process with mean zero and covariance equal to the Kronecker product of temporal and spatial covariance kernels. Temporal covariance was modelled via an autoregressive order 1 function and spatial covariance was assumed to be an isotropic, stationary Matérn function. Also included were country-specific random effects, along with additional spatiotemporal residuals to account for any remaining variation beyond the predictive capability of modelled covariates, random effects, and observation-specific irreducible error. Models were fit in R version 4.2.1 and with the R-INLA package [51,52].

This modelling framework produced 500 Bayesian posterior samples of dose-specific coverage estimates for each 5x5-kilometer (km) area for years 2000 through 2019. Results were calibrated to updated national-level estimates from the Global Burden of Diseases, Injuries, and Risk Factors Study 2020 [3]. These pixel-level estimates were then aggregated based on fractional population weights to first- and second-level administrative units using population estimates from the WorldPop project and a modified version of the Database of Global Administrative Areas (GADM) shapefile [35,37]. Similar models have been validated previously using spatially stratified five-fold out-of-sample cross-validation and have yielded high predictive validity [17,18].

### *1.3 Additional limitations*

This study is subject to several important additional limitations. First, these results are the product of a secondary analysis of modeled estimates of vaccination coverage and the spatial distribution of other health indicators. These modeled estimates allow for comparisons across space and time, including in years without available survey data, and at finer geographic resolutions than are typically available using traditional analytic methods. In cases where two geospatial models use similar predictive covariates, however, our approach may over-estimate the degree of correlation between indicators. Second, spatial smoothing inherent in geospatial modeling may underestimate true short-scale spatial variation in each indicator, especially if high-spatial-resolution data are not available. These approaches may be particularly limited in analyzing geographic overlap in dense urban settings as a result. Third, comparisons in these analyses relied on mean estimates of the different indicators and did not account for the uncertainty intervals associated with each of them.

## Supplemental Tables

*Supplemental Table S1: Ten countries with highest no-DTP counts in 2019 and indicator data availability details*

| Rank | Country     | Children with no-DTP in 2019* | Stunting available? | U5M available? | Missed ITNs available? | Missed ORT available? | LF available? |
|------|-------------|-------------------------------|---------------------|----------------|------------------------|-----------------------|---------------|
| 1    | Nigeria**   | 2,437,252                     | X                   | X              | X                      | X                     | X             |
| 2    | India       | 1,992,430                     | X                   |                |                        | X                     |               |
| 3    | DRC**       | 1,066,064                     | X                   | X              | X                      | X                     | X             |
| 4    | Ethiopia**  | 907,989                       | X                   | X              | X                      | X                     | X             |
| 5    | Indonesia** | 804,887                       | X                   | X              |                        | X                     | X             |
| 6    | Mexico      | 569,160                       | X                   |                |                        | X                     |               |
| 7    | Pakistan    | 549,225                       | X                   | X              |                        | X                     |               |
| 8    | Angola**    | 318,400                       | X                   | X              | X                      | X                     | X             |
| 9    | Somalia     | 216,876                       | X                   | X              | X                      | X                     | X             |
| 10   | Chad        | 178,750                       | X                   | X              | X                      | X                     | X             |

\*Counts estimated according to geospatial modeling methods described for estimating coverage of DTP1, combined with under 1 population counts according to Worldpop [35].

\*\*The five countries with highest estimated numbers of zero-dose children and available spatial estimates for at least 4 out of 5 of the comparator indicators were selected for inclusion in the overlap analyses.

1 *Supplemental Table S2: Surveys included in DTP modeling*

2

| Country | GPS-located clusters | Areally-located clusters | Number of children included | Series                                                       | Years     | Citation                                                                                                                                                                                                                                                 | Link                 |
|---------|----------------------|--------------------------|-----------------------------|--------------------------------------------------------------|-----------|----------------------------------------------------------------------------------------------------------------------------------------------------------------------------------------------------------------------------------------------------------|----------------------|
| Angola  | 0                    | 18                       | 5617                        | Angola Multiple Indicator Cluster Survey 2001                | 2001      | National Institute of Statistics (Angola), United Nations Children's Fund (UNICEF). Angola Multiple Indicator Cluster Survey 2001. New York, United States of America: United Nations Children's Fund (UNICEF).                                          | <a href="#">GHDx</a> |
| Angola  | 0                    | 18                       | 5710                        | Angola Integrated Inquiry into People's Well-Being 2008-2009 | 2008-2009 | National Institute of Statistics (Angola), Oxford Policy Management, United Nations Children's Fund (UNICEF). Angola Integrated Inquiry into People's Well-Being 2008-2009.                                                                              | <a href="#">GHDx</a> |
| Angola  | 625                  | 0                        | 8470                        | Angola Demographic and Health Survey 2015-2016               | 2015-2016 | ICF International, Ministry of Health (Angola), National Institute of Statistics (Angola), United Nations Children's Fund (UNICEF). Angola Demographic and Health Survey 2015-2016. Fairfax, United States of America: ICF International, 2017.          | <a href="#">GHDx</a> |
| Burundi | 0                    | 534                      | 6308                        | Burundi Multiple Indicator Cluster Survey 2005               | 2005      | United Nations Children's Fund (UNICEF), Burundi Institute of Statistics and Economic Studies, United Nations Population Fund (UNFPA). Burundi Multiple Indicator Cluster Survey 2005. New York, United States: United Nations Children's Fund (UNICEF). | <a href="#">GHDx</a> |
| Burundi | 376                  | 0                        | 7224                        | Burundi Demographic and Health Survey 2010-2011              | 2010-2011 | Burundi Institute of Statistics and Economic Studies, ICF International, Ministry of Public Health and the Fight Against AIDS (Burundi). Burundi Demographic and Health Survey 2010-2011. Fairfax, United States of America: ICF International, 2012.    | <a href="#">GHDx</a> |
| Burundi | 552                  | 0                        | 7591                        | Burundi Demographic and Health Survey 2016-2017              | 2016-2017 | Burundi Institute of Statistics and Economic Studies, ICF International, Ministry of Public Health and the Fight Against AIDS (Burundi). Burundi Demographic and Health Survey 2016-2017. Fairfax, United States of America: ICF International, 2018.    | <a href="#">GHDx</a> |
| Benin   | 247                  | 0                        | 4703                        | Benin Demographic and Health Survey 2001                     | 2001      | National Institute of Statistics and Economic Analysis (INSAE) (Benin), ORC Macro. Benin Demographic and Health Survey 2001. Fairfax, United States of America: ICF International.                                                                       | <a href="#">GHDx</a> |
| Benin   | 0                    | 12                       | 13784                       | Benin Demographic                                            | 2006      | Macro International, Inc, National Institute of Statistics and Economic Analysis (INSAE) (Benin), National Program                                                                                                                                       | <a href="#">GHDx</a> |

| Country      | GPS-located clusters | Areally-located clusters | Number of children included | Series                                                         | Years     | Citation                                                                                                                                                                                                                                                                                                                                                                                                                  | Link                 |
|--------------|----------------------|--------------------------|-----------------------------|----------------------------------------------------------------|-----------|---------------------------------------------------------------------------------------------------------------------------------------------------------------------------------------------------------------------------------------------------------------------------------------------------------------------------------------------------------------------------------------------------------------------------|----------------------|
|              |                      |                          |                             | and Health Survey 2006                                         |           | Against AIDS (PNLS) (Benin). Benin Demographic and Health Survey 2006. Fairfax, United States of America: ICF International.                                                                                                                                                                                                                                                                                              |                      |
| Benin        | 0                    | 12                       | 6310                        | Benin Multiple Indicator Cluster Survey 2014                   | 2014      | National Institute of Statistics and Economic Analysis (INSAE) (Benin), United Nations Children's Fund (UNICEF). Benin Multiple Indicator Cluster Survey 2014. New York, United States of America: United Nations Children's Fund (UNICEF), 2017.                                                                                                                                                                         | <a href="#">GHDx</a> |
| Benin        | 540                  | 0                        | 7586                        | Benin Demographic and Health Survey 2017-2018                  | 2017-2018 | Hubert Koutoukou Maga National University Hospital Center (CNHU-HKM)(Benin), ICF International, National Institute of Statistics and Economic Analysis (INSAE) (Benin), National Malaria Control Program, Ministry of Health (Benin), Permanent Secretariat of the Food Council and Nutrition (SP-CAN)(Benin). Benin Demographic and Health Survey 2017-2018. Fairfax, United States of America: ICF International, 2018. | <a href="#">GHDx</a> |
| Burkina Faso | 195                  | 0                        | 5096                        | Burkina Faso Multiple Indicator Cluster Survey 2006            | 2006      | National Institute of Statistics and Demography (Burkina Faso), United Nations Children's Fund (UNICEF). Burkina Faso Multiple Indicator Cluster Survey 2006. New York, United States of America: United Nations Children's Fund (UNICEF).                                                                                                                                                                                | <a href="#">GHDx</a> |
| Burkina Faso | 397                  | 0                        | 9229                        | Burkina Faso Demographic and Health Survey 2003                | 2003      | Macro International, Inc, National Institute of Statistics and Demography (Burkina Faso). Burkina Faso Demographic and Health Survey 2003. Fairfax, United States of America: ICF International.                                                                                                                                                                                                                          | <a href="#">GHDx</a> |
| Burkina Faso | 541                  | 0                        | 12898                       | Burkina Faso Demographic and Health Survey 2010-2011           | 2010-2011 | ICF Macro, Ministry of Health (Burkina Faso), National Institute of Statistics and Demography (Burkina Faso). Burkina Faso Demographic and Health Survey 2010-2011. Fairfax, United States of America: ICF International.                                                                                                                                                                                                 | <a href="#">GHDx</a> |
| Burkina Faso | 0                    | 13                       | 5990                        | Burkina Faso Global Fund Household Health Coverage Survey 2008 | 2008      | Global Fund to Fight Aids Tuberculosis and Malaria (GFATM). Burkina Faso Global Fund Household Health Coverage Survey 2008.                                                                                                                                                                                                                                                                                               | <a href="#">GHDx</a> |
| Burkina Faso | 0                    | 13                       | 6677                        | Burkina Faso Continuous Multisectoral Survey 2014              | 2014      | National Institute of Statistics and Demography (Burkina Faso), World Bank. Burkina Faso Continuous Multisectoral Survey 2014. Washington DC, United States of America: World Bank.                                                                                                                                                                                                                                       | <a href="#">GHDx</a> |

| Country                  | GPS-located clusters | Areally-located clusters | Number of children included | Series                                                               | Years     | Citation                                                                                                                                                                                                                                                                                                                                                          | Link                 |
|--------------------------|----------------------|--------------------------|-----------------------------|----------------------------------------------------------------------|-----------|-------------------------------------------------------------------------------------------------------------------------------------------------------------------------------------------------------------------------------------------------------------------------------------------------------------------------------------------------------------------|----------------------|
| Central African Republic | 0                    | 17                       | 12778                       | Central African Republic Multiple Indicator Cluster Survey 2000      | 2000      | Division of Statistics and Economic and Social Studies (Central African Republic), Ministry of Economy, Planning and International Cooperation (Central African Republic), United Nations Children's Fund (UNICEF). Central African Republic Multiple Indicator Cluster Survey 2000. New York, United States of America: United Nations Children's Fund (UNICEF). | <a href="#">GHDx</a> |
| Central African Republic | 0                    | 17                       | 9311                        | Central African Republic Multiple Indicator Cluster Survey 2010-2011 | 2010-2011 | Central African Institute of Statistics, Economic and Social Studies (ICASEES) (Central African Republic), ICF International. Central African Republic Multiple Indicator Cluster Survey 2010-2011. Fairfax, United States of America: ICF International, 2013.                                                                                                   | <a href="#">GHDx</a> |
| Côte d'Ivoire            | 341                  | 0                        | 6822                        | Côte d'Ivoire Demographic and Health Survey 2011-2012                | 2011-2012 | ICF International, Ministry of the Fight Against AIDS (Côte d'Ivoire), National Institute of Statistics (Côte d'Ivoire). Côte d'Ivoire Demographic and Health Survey 2011-2012. Fairfax, United States of America: ICF International.                                                                                                                             | <a href="#">GHDx</a> |
| Côte d'Ivoire            | 0                    | 11                       | 3136                        | Côte d'Ivoire Multiple Indicator Cluster Survey 2006                 | 2006      | United Nations Children's Fund (UNICEF), National Institute of Statistics (Côte d'Ivoire). Côte d'Ivoire Multiple Indicator Cluster Survey 2006. New York, United States: United Nations Children's Fund (UNICEF).                                                                                                                                                | <a href="#">GHDx</a> |
| Côte d'Ivoire            | 0                    | 11                       | 7943                        | Côte d'Ivoire Multiple Indicator Cluster Survey 2000                 | 2000      | National School for Statistics and Economics Applied (ENSEA), United Nations Children's Fund (UNICEF), United Nations Educational, Scientific and Cultural Organization (UNESCO). Côte d'Ivoire Multiple Indicator Cluster Survey 2000. New York, United States of America: United Nations Children's Fund (UNICEF).                                              | <a href="#">GHDx</a> |
| Cameroon                 | 0                    | 10                       | 3403                        | Cameroon Multiple Indicator Cluster Survey 2000                      | 2000      | Directorate of Statistics and National Accounts, Ministry of Economics and Finance (Cameroon), United Nations Children's Fund (UNICEF). Cameroon Multiple Indicator Cluster Survey 2000. New York, United States of America: United Nations Children's Fund (UNICEF).                                                                                             | <a href="#">GHDx</a> |
| Cameroon                 | 0                    | 218                      | 5717                        | Cameroon Multiple Indicator Cluster Survey 2006                      | 2006      | United Nations Children's Fund (UNICEF), National Institute of Statistics (Cameroon). Cameroon Multiple Indicator Cluster Survey 2006. New York, United States: United Nations Children's Fund (UNICEF).                                                                                                                                                          | <a href="#">GHDx</a> |

| Country                          | GPS-located clusters | Areally-located clusters | Number of children included | Series                                                                  | Years     | Citation                                                                                                                                                                                                                                                                                                | Link                 |
|----------------------------------|----------------------|--------------------------|-----------------------------|-------------------------------------------------------------------------|-----------|---------------------------------------------------------------------------------------------------------------------------------------------------------------------------------------------------------------------------------------------------------------------------------------------------------|----------------------|
| Cameroon                         | 461                  | 0                        | 7159                        | Cameroon Demographic and Health Survey 2004                             | 2004      | Macro International, Inc, National Institute of Statistics (Cameroon). Cameroon Demographic and Health Survey 2004. Fairfax, United States of America: ICF International.                                                                                                                               | <a href="#">GHDx</a> |
| Cameroon                         | 577                  | 0                        | 10629                       | Cameroon Demographic and Health Survey 2011                             | 2011      | ICF International, Ministry of Economy, Planning and Regional Development (Cameroon), Ministry of Public Health (Cameroon), National Institute of Statistics (Cameroon), Pasteur Center of Cameroon. Cameroon Demographic and Health Survey 2011. Fairfax, United States of America: ICF International. | <a href="#">GHDx</a> |
| Cameroon                         | 0                    | 12                       | 3345                        | Cameroon Multiple Indicator Cluster Survey 2014                         | 2014      | Ministry of Public Health (Cameroon), National Institute of Statistics (Cameroon), United Nations Children's Fund (UNICEF). Cameroon Multiple Indicator Cluster Survey 2014. New York, United States of America: United Nations Children's Fund (UNICEF), 2017.                                         | <a href="#">GHDx</a> |
| Cameroon                         | 429                  | 0                        | 5487                        | Cameroon Demographic and Health Survey 2018-2019                        | 2018-2019 | ICF International, Ministry of Public Health (Cameroon), National Institute of Statistics (Cameroon). Cameroon Demographic and Health Survey 2018-2019. Fairfax, United States of America: ICF International.                                                                                           | <a href="#">GHDx</a> |
| Democratic Republic of the Congo | 0                    | 11                       | 2023                        | Democratic Republic of the Congo Multiple Indicator Cluster Survey 2001 | 2001      | Ministry of Planning and Reconstruction (Congo, DR), United Nations Children's Fund (UNICEF). Congo, DR Multiple Indicator Cluster Survey 2001. New York, United States: United Nations Children's Fund (UNICEF).                                                                                       | <a href="#">GHDx</a> |
| Democratic Republic of the Congo | 293                  | 0                        | 7622                        | Democratic Republic of the Congo Demographic and Health Survey 2007     | 2007      | Macro International, Inc, Ministry of Planning (Congo, DR). Democratic Republic of the Congo Demographic and Health Survey 2007. Fairfax, United States of America: ICF International.                                                                                                                  | <a href="#">GHDx</a> |
| Democratic Republic of the Congo | 357                  | 0                        | 10109                       | Democratic Republic of the Congo Multiple Indicator Cluster Survey 2010 | 2010      | National Statistical Institute (Congo, DR), Ministry of Planning (Congo, DR), United Nations Children's Fund (UNICEF). Congo, DR Multiple Indicator Cluster Survey 2010. New York, United States: United Nations Children's Fund (UNICEF).                                                              | <a href="#">GHDx</a> |

| Country                          | GPS-located clusters | Areally-located clusters | Number of children included | Series                                                                                                    | Years     | Citation                                                                                                                                                                                                                                                                                                                                     | Link                 |
|----------------------------------|----------------------|--------------------------|-----------------------------|-----------------------------------------------------------------------------------------------------------|-----------|----------------------------------------------------------------------------------------------------------------------------------------------------------------------------------------------------------------------------------------------------------------------------------------------------------------------------------------------|----------------------|
| Democratic Republic of the Congo | 492                  | 0                        | 15808                       | Democratic Republic of the Congo Demographic and Health Survey 2013-2014                                  | 2013-2014 | ICF International, Ministry of Planning and Monitoring Implementation of the Revolution of Modernity (Congo, DR), Ministry of Public Health (Congo, DR), National Institute of Statistics (Congo, DR). Democratic Republic of the Congo Demographic and Health Survey 2013-2014. Fairfax, United States of America: ICF International, 2014. | <a href="#">GHDx</a> |
| Democratic Republic of the Congo | 0                    | 26                       | 6899                        | Democratic Republic of the Congo Multiple Indicator Cluster Survey 2017-2018                              | 2017-2018 | National Statistical Institute (Congo, DR), Ministry of Planning (Congo, DR), United Nations Children's Fund (UNICEF). Congo, DR Multiple Indicator Cluster Survey 2010. New York, United States: United Nations Children's Fund (UNICEF).                                                                                                   | <a href="#">GHDx</a> |
| Democratic Republic of the Congo | 0                    | 497                      | 43461                       | Democratic Republic of the Congo Vaccination Coverage Survey among Children from 6 to 23 Months 2021-2022 | 2021-2022 | School of Public Health, University of Kinshasa. Democratic Republic of the Congo Vaccination Coverage Survey among Children from 6 to 23 Months 2021-2022.                                                                                                                                                                                  | <a href="#">GHDx</a> |
| Congo                            | 0                    | 12                       | 1487                        | Congo Demographic and Health Survey 2005                                                                  | 2005      | Macro International, Inc, National Center for Statistics and Economic Studies (Congo, Rep.). Congo Demographic and Health Survey 2005. Fairfax, United States of America: ICF International.                                                                                                                                                 | <a href="#">GHDx</a> |
| Congo                            | 0                    | 12                       | 7703                        | Congo Demographic and Health Survey 2011-2012                                                             | 2011-2012 | ICF International, Ministry of Health (Congo, Rep.), National Center for Statistics and Economic Studies (Congo, Rep.). Congo Demographic and Health Survey 2011-2012. Fairfax, United States of America: ICF International.                                                                                                                 | <a href="#">GHDx</a> |
| Congo                            | 0                    | 11                       | 4547                        | Congo Multiple Indicator Cluster Survey 2014-2015                                                         | 2014-2015 | National Institute of Statistics (INS) (Congo, Rep.), United Nations Children's Fund (UNICEF). Congo Multiple Indicator Cluster Survey 2014-2015. New York, United States of America: United Nations Children's Fund (UNICEF), 2018.                                                                                                         | <a href="#">GHDx</a> |
| Comoros                          | 0                    | 3                        | 4431                        | Comoros Multiple Indicator                                                                                | 2000      | United Nations Development Programme (UNDP), United Nations Children's Fund (UNICEF). Comoros Multiple                                                                                                                                                                                                                                       | <a href="#">GHDx</a> |

| Country    | GPS-located clusters | Areally-located clusters | Number of children included | Series                                          | Years     | Citation                                                                                                                                                                                                                                                                                | Link                 |
|------------|----------------------|--------------------------|-----------------------------|-------------------------------------------------|-----------|-----------------------------------------------------------------------------------------------------------------------------------------------------------------------------------------------------------------------------------------------------------------------------------------|----------------------|
|            |                      |                          |                             | Cluster Survey 2000                             |           | Indicator Cluster Survey 2000. New York, United States: United Nations Children's Fund (UNICEF).                                                                                                                                                                                        |                      |
| Comoros    | 242                  | 0                        | 2818                        | Comoros Demographic and Health Survey 2012-2013 | 2012-2013 | General Directorate of Statistics and Forecasting (Comoros), ICF International. Comoros Demographic and Health Survey 2012-2013. Fairfax, United States of America: ICF International.                                                                                                  | <a href="#">GHDx</a> |
| Cabo Verde | 0                    | 9                        | 381                         | Cape Verde Demographic and Health Survey 2005   | 2005      | Macro International, Inc, Ministry of Health (Cape Verde), National Institute of Statistics (Cape Verde). Cape Verde Demographic and Health Survey 2005.                                                                                                                                | <a href="#">GHDx</a> |
| Djibouti   | 0                    | 1                        | 549                         | Djibouti Family Health Survey 2002              | 2002      | Department of Statistics and Demographic Studies (Djibouti), League of Arab States, Ministry of Health (Djibouti), Pan Arab Project for Family Health (PAPFAM). Djibouti Family Health Survey 2002.                                                                                     | <a href="#">GHDx</a> |
| Djibouti   | 35                   | 1                        | 1871                        | Djibouti Multiple Indicator Cluster Survey 2006 | 2006      | Ministry of Economy, Finance, and Planning in charge of Privatization (Djibouti), Ministry of Health (Djibouti), United Nations Children's Fund (UNICEF). Djibouti Multiple Indicator Cluster Survey 2006. New York, United States of America: United Nations Children's Fund (UNICEF). | <a href="#">GHDx</a> |
| Djibouti   | 0                    | 6                        | 783                         | Djibouti Family Health Survey 2012              | 2012      | Department of Statistics and Demographic Studies (Djibouti), League of Arab States, Ministry of Health (Djibouti), Pan Arab Project for Family Health (PAPFAM). Djibouti Family Health Survey 2012.                                                                                     | <a href="#">GHDx</a> |
| Eritrea    | 0                    | 6                        | 5155                        | Eritrea Demographic and Health Survey 2002      | 2002      | Macro International, Inc, National Statistics and Evaluation Office (Eritrea). Eritrea Demographic and Health Survey 2002. Fairfax, United States of America: ICF International.                                                                                                        | <a href="#">GHDx</a> |
| Eritrea    | 0                    | 6                        | 1157                        | Eritrea Population and Health Survey 2010       | 2010      | Kenya Medical Research Institute (KEMRI), National Statistics Office (Eritrea), The Fafo Research Foundation. Eritrea Population and Health Survey 2010.                                                                                                                                | <a href="#">GHDx</a> |
| Ethiopia   | 528                  | 0                        | 8740                        | Ethiopia Demographic and Health Survey 2005     | 2005      | Macro International, Inc, Population and Housing Census Commissions Office (PHCCO). Ethiopia Demographic and Health Survey 2005. Fairfax, United States of America: ICF International.                                                                                                  | <a href="#">GHDx</a> |
| Ethiopia   | 533                  | 0                        | 9387                        | Ethiopia Demographic and Health Survey 2000     | 2000      | Central Statistics Agency (Ethiopia), ORC Macro. Ethiopia Demographic and Health Survey 2000. Calverton, United States of America: ORC Macro, 2001.                                                                                                                                     | <a href="#">GHDx</a> |

| Country  | GPS-located clusters | Areally-located clusters | Number of children included | Series                                              | Years     | Citation                                                                                                                                                                                                                                                             | Link                 |
|----------|----------------------|--------------------------|-----------------------------|-----------------------------------------------------|-----------|----------------------------------------------------------------------------------------------------------------------------------------------------------------------------------------------------------------------------------------------------------------------|----------------------|
| Ethiopia | 571                  | 0                        | 10321                       | Ethiopia Demographic and Health Survey 2010-2011    | 2010-2011 | Central Statistics Agency (Ethiopia), ICF Macro, Ministry of Health (Ethiopia). Ethiopia Demographic and Health Survey 2010-2011. Fairfax, United States of America: ICF International.                                                                              | <a href="#">GHDx</a> |
| Ethiopia | 620                  | 0                        | 5711                        | Ethiopia Demographic and Health Survey 2016         | 2016      | Central Statistics Agency (Ethiopia), ICF International. Ethiopia Demographic and Health Survey 2016. Fairfax, United States of America: ICF International, 2017.                                                                                                    | <a href="#">GHDx</a> |
| Ethiopia | 0                    | 11                       | 2661                        | Ethiopia Interim Demographic and Health Survey 2019 | 2019      | Central Statistics Agency (Ethiopia), Ethiopian Public Health Institute (EPHI), ICF International, Ministry of Health (Ethiopia). Ethiopia Interim Demographic and Health Survey 2019.                                                                               | <a href="#">GHDx</a> |
| Gabon    | 0                    | 40                       | 4051                        | Gabon Demographic and Health Survey 2000-2001       | 2000-2001 | General Directorate of Statistics and Economic Studies (Gabon), Macro International, Inc. Gabon Demographic and Health Survey 2000-2001. Fairfax, United States of America: ICF International.                                                                       | <a href="#">GHDx</a> |
| Gabon    | 330                  | 0                        | 5606                        | Gabon Demographic and Health Survey 2012            | 2012      | General Directorate of Statistics (Gabon), ICF International, Ministry of Economy, Employment and Sustainable Development (Gabon), Ministry of Health (Gabon). Gabon Demographic and Health Survey 2012. Fairfax, United States of America: ICF International, 2013. | <a href="#">GHDx</a> |
| Ghana    | 0                    | 10                       | 618                         | Ghana Multiple Indicator Cluster Survey 2006        | 2006      | Ministry of Health (MOH) (Ghana), Ghana Statistical Service and United Nations Children's Fund (UNICEF). Ghana Multiple Indicator Cluster Survey 2006. New York, United States: United Nations Children's Fund (UNICEF).                                             | <a href="#">GHDx</a> |
| Ghana    | 408                  | 0                        | 3479                        | Ghana Demographic and Health Survey 2003            | 2003      | Ghana Statistical Service, Macro International, Inc. Ghana Demographic and Health Survey 2003. Fairfax, United States of America: ICF International.                                                                                                                 | <a href="#">GHDx</a> |
| Ghana    | 401                  | 0                        | 2727                        | Ghana Demographic and Health Survey 2008            | 2008      | Ghana Statistical Service, Macro International, Inc, Ministry of Health (Ghana). Ghana Demographic and Health Survey 2008. Fairfax, United States of America: ICF International.                                                                                     | <a href="#">GHDx</a> |
| Ghana    | 805                  | 0                        | 7451                        | Ghana Multiple Indicator                            | 2011      | Centers for Disease Control and Prevention (CDC), Ghana Statistical Service, Government of Japan, ICF Macro, Ministry of Health (Ghana), Navrongo Health Research Centre, United                                                                                     | <a href="#">GHDx</a> |

| Country | GPS-located clusters | Areally-located clusters | Number of children included | Series                                            | Years     | Citation                                                                                                                                                                                                                                                                                                                                                                                                                                                     | Link                 |
|---------|----------------------|--------------------------|-----------------------------|---------------------------------------------------|-----------|--------------------------------------------------------------------------------------------------------------------------------------------------------------------------------------------------------------------------------------------------------------------------------------------------------------------------------------------------------------------------------------------------------------------------------------------------------------|----------------------|
|         |                      |                          |                             | Cluster Survey 2011                               |           | Nations Children's Fund (UNICEF), United Nations Population Fund (UNFPA), United States Agency for International Development (USAID). Ghana Multiple Indicator Cluster Survey 2011. New York, United States of America: United Nations Children's Fund (UNICEF), 2013.                                                                                                                                                                                       |                      |
| Ghana   | 422                  | 0                        | 5499                        | Ghana Demographic and Health Survey 2014          | 2014      | Ghana Health Service, Ghana Statistical Service, ICF International. Ghana Demographic and Health Survey 2014. Fairfax, United States of America: ICF International, 2016.                                                                                                                                                                                                                                                                                    | <a href="#">GHDx</a> |
| Ghana   | 0                    | 10                       | 3274                        | Ghana Multiple Indicator Cluster Survey 2017-2018 | 2017-2018 | Centers for Disease Control and Prevention (CDC), Ghana Statistical Service, Government of Japan, ICF Macro, Ministry of Health (Ghana), Navrongo Health Research Centre, United Nations Children's Fund (UNICEF), United Nations Population Fund (UNFPA), United States Agency for International Development (USAID). Ghana Multiple Indicator Cluster Survey 2017-2018. New York, United States of America: United Nations Children's Fund (UNICEF), 2013. | <a href="#">GHDx</a> |
| Guinea  | 291                  | 0                        | 5465                        | Guinea Demographic and Health Survey 2005         | 2005      | Macro International, Inc, National Statistics Directorate (Guinea). Guinea Demographic and Health Survey 2005. Fairfax, United States of America: ICF International.                                                                                                                                                                                                                                                                                         | <a href="#">GHDx</a> |
| Guinea  | 300                  | 0                        | 6414                        | Guinea Demographic and Health Survey 2012         | 2012      | ICF Macro, Ministry of Health and Public Hygiene (Guinea), National Institute of Statistics (Guinea). Guinea Demographic and Health Survey 2012. Fairfax, United States of America: ICF International.                                                                                                                                                                                                                                                       | <a href="#">GHDx</a> |
| Guinea  | 0                    | 8                        | 3867                        | Guinea Multiple Indicator Cluster Survey 2016     | 2016      | National Institute of Public Health (NPHI) (Guinea), National Institute of Statistics (Guinea), National Malaria Control Program (Guinea), United Nations Children's Fund (UNICEF). Guinea Multiple Indicator Cluster Survey 2016. New York, United States of America: United Nations Children's Fund (UNICEF), 2018.                                                                                                                                        | <a href="#">GHDx</a> |
| Guinea  | 400                  | 0                        | 4211                        | Guinea Demographic and Health Survey 2018         | 2018      | Ministry of Health (Guinea), Ministry of Planning and Economic Development (Guinea), National Institute of Statistics (Guinea). Guinea Demographic and Health Survey 2018. Fairfax, United States of America: ICF International, 2019.                                                                                                                                                                                                                       | <a href="#">GHDx</a> |
| Gambia  | 0                    | 7                        | 3153                        | Gambia Multiple Indicator                         | 2000      | Central Statistics Department (Gambia), United Nations Children's Fund (UNICEF). Gambia Multiple Indicator Cluster Survey 2000. New York, United States: United Nations Children's Fund (UNICEF).                                                                                                                                                                                                                                                            | <a href="#">GHDx</a> |

| Country       | GPS-located clusters | Areally-located clusters | Number of children included | Series                                               | Years     | Citation                                                                                                                                                                                                                                          | Link                 |
|---------------|----------------------|--------------------------|-----------------------------|------------------------------------------------------|-----------|---------------------------------------------------------------------------------------------------------------------------------------------------------------------------------------------------------------------------------------------------|----------------------|
|               |                      |                          |                             | Cluster Survey 2000                                  |           |                                                                                                                                                                                                                                                   |                      |
| Gambia        | 0                    | 35                       | 6252                        | Gambia Multiple Indicator Cluster Survey 2005-2006   | 2005-2006 | Gambia Bureau of Statistics (GBOS), United Nations Children's Fund (UNICEF). Gambia Multiple Indicator Cluster Survey 2005-2006. New York, United States of America: United Nations Children's Fund (UNICEF).                                     | <a href="#">GHDx</a> |
| Gambia        | 0                    | 36                       | 6394                        | Gambia Demographic and Health Survey 2013            | 2013      | Gambia Bureau of Statistics (GBOS), ICF International, Ministry of Health and Social Welfare (The Gambia). Gambia Demographic and Health Survey 2013. Fairfax, United States of America: ICF International, 2015.                                 | <a href="#">GHDx</a> |
| Gambia        | 0                    | 5                        | 7578                        | Gambia Multiple Indicator Cluster Survey 2010        | 2010      | Gambia Bureau of Statistics (GBOS), United Nations Children's Fund (UNICEF). Gambia Multiple Indicator Cluster Survey 2010. New York, United States of America: United Nations Children's Fund (UNICEF), 2018.                                    | <a href="#">GHDx</a> |
| Gambia        | 0                    | 7                        | 4907                        | Gambia Multiple Indicator Cluster Survey 2018        | 2018      | Gambia Bureau of Statistics (GBOS), United Nations Children's Fund (UNICEF). Gambia Multiple Indicator Cluster Survey 2018. New York, United States of America: United Nations Children's Fund (UNICEF), 2019.                                    | <a href="#">GHDx</a> |
| Gambia        | 0                    | 7                        | 4395                        | Gambia Demographic and Health Survey 2019-2020       | 2019-2020 | Gambia Bureau of Statistics (GBOS), ICF International, Ministry of Health and Social Welfare (The Gambia). Gambia Demographic and Health Survey 2019-2020. Fairfax, United States of America: ICF International, 2021.                            | <a href="#">GHDx</a> |
| Guinea-Bissau | 0                    | 9                        | 4575                        | Guinea-Bissau Multiple Indicator Cluster Survey 2000 | 2000      | Secretary State of Planning, National Institute of Statistics and Census (INEC), United Nations Children's Fund (UNICEF). Guinea-Bissau Multiple Indicator Cluster Survey 2000. New York, United States: United Nations Children's Fund (UNICEF). | <a href="#">GHDx</a> |
| Guinea-Bissau | 0                    | 9                        | 5111                        | Guinea-Bissau Multiple Indicator Cluster Survey 2006 | 2006      | United Nations Children's Fund (UNICEF), Government of Guinea-Bissau. Guinea-Bissau Multiple Indicator Cluster Survey 2006. New York, United States: United Nations Children's Fund (UNICEF).                                                     | <a href="#">GHDx</a> |
| Guinea-Bissau | 0                    | 9                        | 4020                        | Guinea-Bissau Multiple Indicator                     | 2014      | National Statistics Institute (Guinea-Bissau), United Nations Children's Fund (UNICEF). Guinea-Bissau Multiple Indicator Cluster Survey 2014. New York, United States of America: United Nations Children's Fund (UNICEF), 2016.                  | <a href="#">GHDx</a> |

| Country           | GPS-located clusters | Areally-located clusters | Number of children included | Series                                                        | Years     | Citation                                                                                                                                                                                                                                                                                                            | Link                 |
|-------------------|----------------------|--------------------------|-----------------------------|---------------------------------------------------------------|-----------|---------------------------------------------------------------------------------------------------------------------------------------------------------------------------------------------------------------------------------------------------------------------------------------------------------------------|----------------------|
|                   |                      |                          |                             | Cluster Survey 2014                                           |           |                                                                                                                                                                                                                                                                                                                     |                      |
| Guinea-Bissau     | 0                    | 8                        | 3764                        | Guinea-Bissau Multiple Indicator Cluster Survey 2018-2019     | 2018-2019 | National Statistics Institute (Guinea-Bissau), United Nations Children's Fund (UNICEF). Guinea-Bissau Multiple Indicator Cluster Survey 2018-2019. New York, United States of America: United Nations Children's Fund (UNICEF), 2020.                                                                               | <a href="#">GHDx</a> |
| Equatorial Guinea | 0                    | 7                        | 2929                        | Equatorial Guinea Multiple Indicator Cluster Survey 2000      | 2000      | Ministry of Planning, Economic Development and Public Investment (Equatorial Guinea), United Nations Children's Fund (UNICEF). Equatorial Guinea Multiple Indicator Cluster Survey 2000. New York, United States of America: United Nations Children's Fund (UNICEF).                                               | <a href="#">GHDx</a> |
| Equatorial Guinea | 0                    | 2                        | 462                         | Equatorial Guinea Demographic and Health Survey 2011          | 2011      | ICF International, Ministry of Health and Social Welfare (Equatorial Guinea), Ministry of Planning, Economic Development and Public Investment (Equatorial Guinea). Equatorial Guinea Demographic and Health Survey 2011. Fairfax, United States of America: ICF International, 2012.                               | <a href="#">GHDx</a> |
| Indonesia         | 1315                 | 0                        | 14622                       | Indonesia Demographic and Health Survey 2002-2003             | 2002-2003 | Macro International, Inc, Ministry of Health (Indonesia), National Family Planning Coordinating Board (Indonesia), Statistics Indonesia. Indonesia Demographic and Health Survey 2002-2003. Fairfax, United States of America: ICF International.                                                                   | <a href="#">GHDx</a> |
| Indonesia         | 0                    | 33                       | 14769                       | Indonesia Demographic and Health Survey 2007                  | 2007      | Macro International, Inc, Ministry of Health (Indonesia), National Family Planning Coordinating Board (Indonesia), Statistics Indonesia. Indonesia Demographic and Health Survey 2007. Fairfax, United States of America: ICF International.                                                                        | <a href="#">GHDx</a> |
| Indonesia         | 0                    | 33                       | 16645                       | Indonesia Demographic and Health Survey 2012                  | 2012      | ICF International, Ministry of Health (Indonesia), National Population and Family Planning Board (Indonesia), Statistics Indonesia. Indonesia Demographic and Health Survey 2012. Fairfax, United States of America: ICF International.                                                                             | <a href="#">GHDx</a> |
| Indonesia         | 0                    | 3                        | 1248                        | Indonesia - West Papua Multiple Indicator Cluster Survey 2011 | 2011      | Ministry of Home Affairs (Indonesia), National Development Planning Agency (BAPPENAS) (Indonesia), Statistics Indonesia, United Nations Children's Fund (UNICEF). Indonesia - West Papua Multiple Indicator Cluster Survey 2011. New York, United States of America: United Nations Children's Fund (UNICEF), 2013. | <a href="#">GHDx</a> |
| Indonesia         | 0                    | 3                        | 1258                        | Indonesia - Papua Multiple                                    | 2011      | Ministry of Home Affairs (Indonesia), National Development Planning Agency (BAPPENAS) (Indonesia), Statistics                                                                                                                                                                                                       | <a href="#">GHDx</a> |

| Country   | GPS-located clusters | Areally-located clusters | Number of children included | Series                                                          | Years     | Citation                                                                                                                                                                                                                                                                                                                                                                                             | Link                 |
|-----------|----------------------|--------------------------|-----------------------------|-----------------------------------------------------------------|-----------|------------------------------------------------------------------------------------------------------------------------------------------------------------------------------------------------------------------------------------------------------------------------------------------------------------------------------------------------------------------------------------------------------|----------------------|
|           |                      |                          |                             | Indicator Cluster Survey 2011                                   |           | Indonesia, United Nations Children's Fund (UNICEF). Indonesia - Papua Multiple Indicator Cluster Survey 2011. New York, United States of America: United Nations Children's Fund (UNICEF), 2013.                                                                                                                                                                                                     |                      |
| Indonesia | 0                    | 1058                     | 4436                        | Indonesia Family Life Survey 2014-2015                          | 2014-2015 | RAND Corporation, SurveyMETER. Indonesia Family Life Survey 2014-2015. Santa Monica, United States of America: RAND Corporation, 2016.                                                                                                                                                                                                                                                               | <a href="#">GHDx</a> |
| Indonesia | 0                    | 33                       | 9367                        | Indonesia Demographic and Health Survey 2017                    | 2017      | Ministry of Health (Indonesia), National Population and Family Planning Board (Indonesia), Statistics Indonesia. Indonesia Demographic and Health Survey 2017. Fairfax, United States of America: ICF International, 2019.                                                                                                                                                                           | <a href="#">GHDx</a> |
| Indonesia | 0                    | 34                       | 53816                       | Indonesia National Socioeconomic Survey 2017                    | 2017      | Central Bureau of Statistics (Indonesia). Indonesia National Socioeconomic Survey 2017. Jakarta, Indonesia: Central Bureau of Statistics (Indonesia), 2018.                                                                                                                                                                                                                                          | <a href="#">GHDx</a> |
| Indonesia | 0                    | 3                        | 20                          | Indonesia Special Demographic and Health Survey 2017            | 2017      | ICF International, Ministry of Health (Indonesia), National Population and Family Planning Board (Indonesia), Statistics Indonesia. Indonesia Special Demographic and Health Survey 2017. Fairfax, United States of America: ICF International, 2019.                                                                                                                                                | <a href="#">GHDx</a> |
| Kenya     | 1310                 | 0                        | 7587                        | Kenya Integrated Household Budget Survey 2005-2006              | 2005-2006 | Central Bureau of Statistics (Kenya), UK Department for International Development (DFID), United States Agency for International Development (USAID), European Union (EU), Danish International Development Agency (DANIDA), World Bank (WB), United Nations Development Programme (UNDP). Kenya Integrated Household Budget Survey 2005-2006. Nairobi, Kenya: Central Bureau of Statistics (Kenya). | <a href="#">GHDx</a> |
| Kenya     | 803                  | 0                        | 7266                        | Kenya Multiple Indicator Cluster Survey 2000                    | 2000      | Central Bureau of Statistics (Kenya), United Nations Children's Fund (UNICEF). Kenya Multiple Indicator Cluster Survey 2000. New York, United States: United Nations Children's Fund (UNICEF).                                                                                                                                                                                                       | <a href="#">GHDx</a> |
| Kenya     | 590                  | 0                        | 13936                       | Kenya - Eastern Province Multiple Indicator Cluster Survey 2008 | 2008      | Kenya National Bureau of Statistics, United Nations Children's Fund (UNICEF). Kenya - Eastern Province Multiple Indicator Cluster Survey 2008. Nairobi, Kenya: Kenya National Bureau of Statistics.                                                                                                                                                                                                  | <a href="#">GHDx</a> |

| Country | GPS-located clusters | Areally-located clusters | Number of children included | Series                                                         | Years     | Citation                                                                                                                                                                                                                                                                                                                                                                                                                                                           | Link                 |
|---------|----------------------|--------------------------|-----------------------------|----------------------------------------------------------------|-----------|--------------------------------------------------------------------------------------------------------------------------------------------------------------------------------------------------------------------------------------------------------------------------------------------------------------------------------------------------------------------------------------------------------------------------------------------------------------------|----------------------|
| Kenya   | 397                  | 0                        | 5677                        | Kenya Demographic and Health Survey 2008-2009                  | 2008-2009 | ICF Macro, Kenya Medical Research Institute (KEMRI), Kenya National Bureau of Statistics, Ministry of Public Health and Sanitation (Kenya), National AIDS and STI Control Programme (NASCOP) (Kenya), National Association of County and City Health Officials (NACCHO) (United States), National Coordinating Agency for Population and Development (Kenya). Kenya Demographic and Health Survey 2008-2009. Fairfax, United States of America: ICF International. | <a href="#">GHDx</a> |
| Kenya   | 0                    | 1                        | 446                         | Kenya - Coast Multiple Indicator Cluster Survey 2009           | 2009      | Kenya National Bureau of Statistics, United Nations Children's Fund (UNICEF). Kenya - Coast Multiple Indicator Cluster Survey 2009. New York, United States of America: United Nations Children's Fund (UNICEF), 2014.                                                                                                                                                                                                                                             | <a href="#">GHDx</a> |
| Kenya   | 289                  | 0                        | 4803                        | Kenya - Nyanza Province Multiple Indicator Cluster Survey 2011 | 2011      | Kenya National Bureau of Statistics, United Nations Children's Fund (UNICEF). Kenya - Nyanza Province Multiple Indicator Cluster Survey 2011. Nairobi, Kenya: Kenya National Bureau of Statistics.                                                                                                                                                                                                                                                                 | <a href="#">GHDx</a> |
| Kenya   | 1584                 | 0                        | 19942                       | Kenya Demographic and Health Survey 2014                       | 2014      | ICF International, Kenya Medical Research Institute (KEMRI), Kenya National Bureau of Statistics, Ministry of Health (Kenya), National AIDS Control Council (Kenya), National Council for Population and Development (Kenya). Kenya Demographic and Health Survey 2014. Fairfax, United States of America: ICF International.                                                                                                                                      | <a href="#">GHDx</a> |
| Kenya   | 40                   | 0                        | 831                         | Kenya - Bungoma County Multiple Indicator Survey 2013-2014     | 2013-2014 | Kenya National Bureau of Statistics, Population Studies and Research Institute, University of Nairobi (Kenya), United Nations Children's Fund (UNICEF). Kenya - Bungoma County Multiple Indicator Survey 2013-2014. New York, United States of America: United Nations Children's Fund (UNICEF), 2015.                                                                                                                                                             | <a href="#">GHDx</a> |
| Kenya   | 48                   | 0                        | 762                         | Kenya - Kakamega County Multiple Indicator                     | 2013-2014 | Kenya National Bureau of Statistics, Population Studies and Research Institute, University of Nairobi (Kenya), United Nations Children's Fund (UNICEF). Kenya - Kakamega County Multiple Indicator Survey 2013-2014. New York, United States of America: United Nations Children's Fund (UNICEF), 2015.                                                                                                                                                            | <a href="#">GHDx</a> |

| Country                          | GPS-located clusters | Areally-located clusters | Number of children included | Series                                                     | Years     | Citation                                                                                                                                                                                                                                                                                               | Link                 |
|----------------------------------|----------------------|--------------------------|-----------------------------|------------------------------------------------------------|-----------|--------------------------------------------------------------------------------------------------------------------------------------------------------------------------------------------------------------------------------------------------------------------------------------------------------|----------------------|
|                                  |                      |                          |                             | Survey 2013-2014                                           |           |                                                                                                                                                                                                                                                                                                        |                      |
| Kenya                            | 50                   | 0                        | 1028                        | Kenya - Turkana County Multiple Indicator Survey 2013-2014 | 2013-2014 | Kenya National Bureau of Statistics, Population Studies and Research Institute, University of Nairobi (Kenya), United Nations Children's Fund (UNICEF). Kenya - Turkana County Multiple Indicator Survey 2013-2014. New York, United States of America: United Nations Children's Fund (UNICEF), 2015. | <a href="#">GHDx</a> |
| Cambodia                         | 470                  | 0                        | 7772                        | Cambodia Demographic and Health Survey 2000                | 2000      | Macro International, Inc, Ministry of Health (Cambodia), National Institute of Statistics (Cambodia). Cambodia Demographic and Health Survey 2000. Fairfax, United States of America: ICF International.                                                                                               | <a href="#">GHDx</a> |
| Cambodia                         | 548                  | 0                        | 7490                        | Cambodia Demographic and Health Survey 2005-2006           | 2005-2006 | Macro International, Inc, National Institute of Public Health (Cambodia), National Institute of Statistics (Cambodia). Cambodia Demographic and Health Survey 2005-2006. Fairfax, United States of America: ICF International.                                                                         | <a href="#">GHDx</a> |
| Cambodia                         | 607                  | 0                        | 7742                        | Cambodia Demographic and Health Survey 2010-2011           | 2010-2011 | ICF Macro, Ministry of Health (Cambodia), National Institute of Statistics (Cambodia). Cambodia Demographic and Health Survey 2010-2011. Fairfax, United States of America: ICF International.                                                                                                         | <a href="#">GHDx</a> |
| Cambodia                         | 258                  | 17                       | 1264                        | Cambodia Socio-Economic Survey 2003-2005                   | 2003-2005 | National Institute of Statistics (Cambodia), Statistics Sweden. Cambodia Socio-Economic Survey 2003-2005. Phnom Penh, Cambodia: National Institute of Statistics (Cambodia).                                                                                                                           | <a href="#">GHDx</a> |
| Cambodia                         | 242                  | 0                        | 587                         | Cambodia Socio-Economic Survey 2006-2007                   | 2006-2007 | National Institute of Statistics (Cambodia), Statistics Sweden. Cambodia Socio-Economic Survey 2006-2007. Phnom Penh, Cambodia: National Institute of Statistics (Cambodia).                                                                                                                           | <a href="#">GHDx</a> |
| Cambodia                         | 609                  | 0                        | 6962                        | Cambodia Demographic and Health Survey 2014                | 2014      | ICF International, Ministry of Health (Cambodia), National Institute of Statistics (Cambodia). Cambodia Demographic and Health Survey 2014. Fairfax, United States of America: ICF International, 2017.                                                                                                | <a href="#">GHDx</a> |
| Lao People's Democratic Republic | 0                    | 3                        | 848                         | Laos Multiple Indicator                                    | 2000      | Ministry of Health (Laos), National Institute of Public Health (NIOPH), National Statistical Center (Laos), United Nations Children's Fund (UNICEF). Laos Multiple Indicator Cluster                                                                                                                   | <a href="#">GHDx</a> |

| Country                          | GPS-located clusters | Areally-located clusters | Number of children included | Series                                             | Years     | Citation                                                                                                                                                                                                                                                                                    | Link                 |
|----------------------------------|----------------------|--------------------------|-----------------------------|----------------------------------------------------|-----------|---------------------------------------------------------------------------------------------------------------------------------------------------------------------------------------------------------------------------------------------------------------------------------------------|----------------------|
|                                  |                      |                          |                             | Cluster Survey 2000                                |           | Survey 2000. New York, United States of America: United Nations Children's Fund (UNICEF).                                                                                                                                                                                                   |                      |
| Lao People's Democratic Republic | 300                  | 0                        | 4093                        | Laos Multiple Indicator Cluster Survey 2006        | 2006      | United Nations Children's Fund (UNICEF), Department of Statistics (Laos), Ministry of Health (Laos). Laos Multiple Indicator Cluster Survey 2006. New York, United States: United Nations Children's Fund (UNICEF).                                                                         | <a href="#">GHDx</a> |
| Lao People's Democratic Republic | 0                    | 17                       | 1873                        | Laos Multiple Indicator Cluster Survey 2011-2012   | 2011-2012 | Ministry of Education and Sports (Laos), Ministry of Health (Laos), Ministry of Planning and Investment (Laos). Laos Multiple Indicator Cluster Survey 2011-2012. New York, United States of America: United Nations Children's Fund (UNICEF), 2013.                                        | <a href="#">GHDx</a> |
| Lao People's Democratic Republic | 0                    | 18                       | 6431                        | Laos Multiple Indicator Cluster Survey 2017        | 2017      | Lao Statistics Bureau, Ministry of Education and Sports (Laos), Ministry of Health (Laos), United Nations Children's Fund (UNICEF). Laos Multiple Indicator Cluster Survey 2017. New York, United States of America: United Nations Children's Fund (UNICEF), 2018.                         | <a href="#">GHDx</a> |
| Liberia                          | 290                  | 0                        | 5131                        | Liberia Demographic and Health Survey 2006-2007    | 2006-2007 | Liberia Institute for Statistics and Geo-information Services (LISGIS), Macro International, Inc. Liberia Demographic and Health Survey 2006-2007. Fairfax, United States of America: ICF International.                                                                                    | <a href="#">GHDx</a> |
| Liberia                          | 322                  | 0                        | 7015                        | Liberia Demographic and Health Survey 2013         | 2013      | ICF International, Liberia Institute for Statistics and Geo-information Services (LISGIS), National AIDS and STI Control Program (NACP), Ministry of Health and Social Welfare (Liberia). Liberia Demographic and Health Survey 2013. Fairfax, United States of America: ICF International. | <a href="#">GHDx</a> |
| Liberia                          | 150                  | 0                        | 1725                        | Liberia Malaria Indicator Survey 2016              | 2016      | ICF International, Liberia Institute for Statistics and Geo-information Services (LISGIS), National Malaria Control Program (Liberia). Liberia Malaria Indicator Survey 2016. Fairfax, United States of America: ICF International, 2017.                                                   | <a href="#">GHDx</a> |
| Liberia                          | 321                  | 0                        | 3125                        | Liberia Demographic and Health Survey 2019-2020    | 2019-2020 | ICF International, Liberia Institute for Statistics and Geo-information Services (LISGIS), Ministry of Health and Social Welfare (Liberia). Liberia Demographic and Health Survey 2019-2020. 2021.                                                                                          | <a href="#">GHDx</a> |
| Madagascar                       | 0                    | 6                        | 2848                        | Madagascar Demographic and Health Survey 2003-2004 | 2003-2004 | Macro International, Inc, National Institute of Statistics (Madagascar). Madagascar Demographic and Health Survey 2003-2004. Fairfax, United States of America: ICF International.                                                                                                          | <a href="#">GHDx</a> |

| Country    | GPS-located clusters | Areally-located clusters | Number of children included | Series                                                    | Years     | Citation                                                                                                                                                                                                                                                                             | Link                 |
|------------|----------------------|--------------------------|-----------------------------|-----------------------------------------------------------|-----------|--------------------------------------------------------------------------------------------------------------------------------------------------------------------------------------------------------------------------------------------------------------------------------------|----------------------|
| Madagascar | 585                  | 0                        | 11510                       | Madagascar Demographic and Health Survey 2008-2009        | 2008-2009 | ICF Macro, National Institute of Statistics (Madagascar). Madagascar Demographic and Health Survey 2008-2009. Fairfax, United States of America: ICF International.                                                                                                                  | <a href="#">GHDx</a> |
| Madagascar | 127                  | 0                        | 2933                        | Madagascar - South Multiple Indicator Cluster Survey 2012 | 2012      | National Institute of Statistics (Madagascar), United Nations Children's Fund (UNICEF). Madagascar - South Multiple Indicator Cluster Survey 2012. New York, United States of America: United Nations Children's Fund (UNICEF), 2015.                                                | <a href="#">GHDx</a> |
| Madagascar | 772                  | 0                        | 7650                        | Madagascar Multiple Indicator Cluster Survey 2018         | 2018      | National Institute of Statistics (Madagascar), United Nations Children's Fund (UNICEF). Madagascar Multiple Indicator Cluster Survey 2018. 2019.                                                                                                                                     | <a href="#">GHDx</a> |
| Madagascar | 649                  | 0                        | 7200                        | Madagascar Demographic and Health Survey 2021             | 2021      | ICF Macro, National Institute of Statistics (Madagascar). Madagascar Demographic and Health Survey 2021. Fairfax, United States of America: ICF International, 2022.                                                                                                                 | <a href="#">GHDx</a> |
| Madagascar | 0                    | 22                       | 3279                        | Madagascar Vaccine Coverage Survey 2021                   | 2021      | Ministry of Public Health (Madagascar), National Institute of Statistics (Madagascar). Madagascar Vaccine Coverage Survey 2021.                                                                                                                                                      | <a href="#">GHDx</a> |
| Mali       | 405                  | 0                        | 12206                       | Mali Demographic and Health Survey 2006                   | 2006      | Macro International, Inc, Ministry of Health (Mali), National Directorate of Statistics and Informatics (DNSI) (Mali). Mali Demographic and Health Survey 2006. Fairfax, United States of America: ICF International.                                                                | <a href="#">GHDx</a> |
| Mali       | 399                  | 0                        | 10824                       | Mali Demographic and Health Survey 2001                   | 2001      | Macro International, Inc, National Directorate of Statistics and Informatics (DNSI) (Mali), Planning and Statistics Unit, Ministry of Health (Mali). Mali Demographic and Health Survey 2001. Fairfax, United States of America: ICF International.                                  | <a href="#">GHDx</a> |
| Mali       | 413                  | 0                        | 9582                        | Mali Demographic and Health Survey 2012-2013              | 2012-2013 | ICF International, INFO-STAT (Mali), Ministry of Health (Mali), National Institute of Statistics (INSTAT) (Mali), Planning and Statistics Unit, Ministry of Health (Mali). Mali Demographic and Health Survey 2012-2013. Fairfax, United States of America: ICF International, 2014. | <a href="#">GHDx</a> |
| Mali       | 0                    | 8                        | 7791                        | Mali Multiple Indicator                                   | 2015      | Ministry of Health (Mali), Ministry of Planning (Mali), National Institute of Statistics (INSTAT) (Mali), United Nations Children's Fund (UNICEF). Mali Multiple Indicator                                                                                                           | <a href="#">GHDx</a> |

| Country    | GPS-located clusters | Areally-located clusters | Number of children included | Series                                                 | Years     | Citation                                                                                                                                                                                                                                                                              | Link                 |
|------------|----------------------|--------------------------|-----------------------------|--------------------------------------------------------|-----------|---------------------------------------------------------------------------------------------------------------------------------------------------------------------------------------------------------------------------------------------------------------------------------------|----------------------|
|            |                      |                          |                             | Cluster Survey 2015                                    |           | Cluster Survey 2015. New York, United States of America: United Nations Children's Fund (UNICEF), 2017.                                                                                                                                                                               |                      |
| Mali       | 0                    | 44                       | 3387                        | Mali Agricultural Integrated Economic Survey 2014-2015 | 2014-2015 | Ministry of Rural Development (Mali), National Institute of Statistics (INSTAT) (Mali), World Bank. Mali Agricultural Integrated Economic Survey 2014-2015. Washington DC, United States of America: World Bank.                                                                      | <a href="#">GHDx</a> |
| Mali       | 328                  | 0                        | 5398                        | Mali Demographic and Health Survey 2018                | 2018      | ICF International, National Institute of Statistics (INSTAT) (Mali), Sector Planning and Statistics Unit Health-Social Development and Family Promotion (CPS / SS-DS-PF) (Mali). Mali Demographic and Health Survey 2018. Fairfax, United States of America: ICF International, 2019. | <a href="#">GHDx</a> |
| Myanmar    | 0                    | 16                       | 14431                       | Myanmar Multiple Indicator Cluster Survey 2000         | 2000      | Ministry of Health (Myanmar), United Nations Children's Fund (UNICEF). Myanmar Multiple Indicator Cluster Survey 2000. New York, United States of America: United Nations Children's Fund (UNICEF).                                                                                   | <a href="#">GHDx</a> |
| Myanmar    | 0                    | 17                       | 14764                       | Myanmar Multiple Indicator Cluster Survey 2009-2010    | 2009-2010 | Ministry of Health (Myanmar), Ministry of National Planning and Economic Development (Myanmar), United Nations Children's Fund (UNICEF). Myanmar Multiple Indicator Cluster Survey 2009-2010.                                                                                         | <a href="#">GHDx</a> |
| Myanmar    | 0                    | 17                       | 10357                       | Myanmar Multiple Indicator Cluster Survey 2003         | 2003      | Ministry of Health (Myanmar), United Nations Children's Fund (UNICEF). Myanmar Multiple Indicator Cluster Survey 2003.                                                                                                                                                                | <a href="#">GHDx</a> |
| Myanmar    | 440                  | 0                        | 4593                        | Myanmar Demographic and Health Survey 2015-2016        | 2015-2016 | ICF International, Ministry of Health and Sports (Myanmar). Myanmar Demographic and Health Survey 2015-2016. Fairfax, United States of America: ICF International, 2017.                                                                                                              | <a href="#">GHDx</a> |
| Mozambique | 0                    | 11                       | 6769                        | Mozambique Demographic and Health Survey 2003-2004     | 2003-2004 | Macro International, Inc, National Institute of Statistics (INE) (Mozambique). Mozambique Demographic and Health Survey 2003-2004. Fairfax, United States of America: ICF International.                                                                                              | <a href="#">GHDx</a> |
| Mozambique | 67                   | 593                      | 10566                       | Mozambique Multiple                                    | 2008-2009 | United Nations Children's Fund (UNICEF), National Statistics Institute (Mozambique). Mozambique Multiple Indicator                                                                                                                                                                    | <a href="#">GHDx</a> |

| Country    | GPS-located clusters | Areally-located clusters | Number of children included | Series                                             | Years     | Citation                                                                                                                                                                                                                                                                                                 | Link                 |
|------------|----------------------|--------------------------|-----------------------------|----------------------------------------------------|-----------|----------------------------------------------------------------------------------------------------------------------------------------------------------------------------------------------------------------------------------------------------------------------------------------------------------|----------------------|
|            |                      |                          |                             | Indicator Cluster Survey 2008-2009                 |           | Cluster Survey 2008-2009. New York, United States: United Nations Children's Fund (UNICEF).                                                                                                                                                                                                              |                      |
| Mozambique | 609                  | 0                        | 10255                       | Mozambique Demographic and Health Survey 2011      | 2011      | ICF Macro, Manhica Health Research Center (CISM), Ministry of Health (Mozambique), National Institute of Statistics (INE) (Mozambique). Mozambique Demographic and Health Survey 2011. Fairfax, United States of America: ICF International.                                                             | <a href="#">GHDx</a> |
| Mozambique | 306                  | 0                        | 4695                        | Mozambique AIDS Indicator Survey 2015              | 2015      | Centers for Disease Control and Prevention (CDC), ICF International, Ministry of Health (Mozambique), National Institute of Health (Mozambique), National Institute of Statistics (INE) (Mozambique). Mozambique AIDS Indicator Survey 2015. Fairfax, United States of America: ICF International, 2018. | <a href="#">GHDx</a> |
| Mauritania | 0                    | 195                      | 8195                        | Mauritania Multiple Indicator Cluster Survey 2007  | 2007      | National Office of Statistics (Mauritania), United Nations Children's Fund (UNICEF). Mauritania Multiple Indicator Cluster Survey 2007. New York, United States of America: United Nations Children's Fund (UNICEF).                                                                                     | <a href="#">GHDx</a> |
| Mauritania | 0                    | 13                       | 3336                        | Mauritania Demographic and Health Survey 2000-2001 | 2000-2001 | Macro International, Inc, National Office of Statistics (Mauritania). Mauritania Demographic and Health Survey 2000-2001. Fairfax, United States of America: ICF International.                                                                                                                          | <a href="#">GHDx</a> |
| Mauritania | 0                    | 194                      | 8880                        | Mauritania Multiple Indicator Cluster Survey 2011  | 2011      | National Office of Statistics (Mauritania), United Nations Children's Fund (UNICEF). Mauritania Multiple Indicator Cluster Survey 2011. New York, United States of America: United Nations Children's Fund (UNICEF), 2015.                                                                               | <a href="#">GHDx</a> |
| Mauritania | 0                    | 13                       | 5107                        | Mauritania Multiple Indicator Cluster Survey 2015  | 2015      | National Office of Statistics (Mauritania), United Nations Children's Fund (UNICEF). Mauritania Multiple Indicator Cluster Survey 2015. New York, United States of America: United Nations Children's Fund (UNICEF), 2018.                                                                               | <a href="#">GHDx</a> |
| Mauritania | 0                    | 12                       | 5315                        | Mauritania Demographic and Health Survey 2019-2020 | 2019-2021 | National Office of Statistics (Mauritania). Mauritania Demographic and Health Survey 2019-2020. Fairfax, United States of America: ICF International, 2022.                                                                                                                                              | <a href="#">GHDx</a> |

| Country | GPS-located clusters | Areally-located clusters | Number of children included | Series                                                        | Years     | Citation                                                                                                                                                                                                                                                                        | Link                 |
|---------|----------------------|--------------------------|-----------------------------|---------------------------------------------------------------|-----------|---------------------------------------------------------------------------------------------------------------------------------------------------------------------------------------------------------------------------------------------------------------------------------|----------------------|
| Malawi  | 0                    | 26                       | 20037                       | Malawi Multiple Indicator Cluster Survey 2006                 | 2006      | United Nations Children's Fund (UNICEF), National Statistics Office (Malawi). Malawi Multiple Indicator Cluster Survey 2006. New York, United States: United Nations Children's Fund (UNICEF).                                                                                  | <a href="#">GHDx</a> |
| Malawi  | 559                  | 0                        | 10359                       | Malawi Demographic and Health Survey 2000                     | 2000      | Macro International, Inc, National Statistical Office of Malawi. Malawi Demographic and Health Survey 2000. Fairfax, United States of America: ICF International.                                                                                                               | <a href="#">GHDx</a> |
| Malawi  | 520                  | 0                        | 9834                        | Malawi Demographic and Health Survey 2004-2005                | 2004-2005 | Macro International, Inc, National Statistical Office of Malawi. Malawi Demographic and Health Survey 2004-2005. Fairfax, United States of America: ICF International.                                                                                                          | <a href="#">GHDx</a> |
| Malawi  | 827                  | 0                        | 17903                       | Malawi Demographic and Health Survey 2010                     | 2010      | ICF Macro, National Statistical Office of Malawi. Malawi Demographic and Health Survey 2010. Fairfax, United States of America: ICF International.                                                                                                                              | <a href="#">GHDx</a> |
| Malawi  | 0                    | 10                       | 1442                        | Malawi Global Fund Household Health Coverage Survey 2007-2008 | 2007-2008 | Ministry of Economic Planning and Development (Malawi), National Statistical Office of Malawi. Malawi Global Fund Household Health Coverage Survey 2007-2008.                                                                                                                   | <a href="#">GHDx</a> |
| Malawi  | 0                    | 31                       | 9487                        | Malawi Multiple Indicator Cluster Survey 2013-2014            | 2013-2014 | National Statistical Office of Malawi, United Nations Children's Fund (UNICEF). Malawi Multiple Indicator Cluster Survey 2013-2014. New York, United States of America: United Nations Children's Fund (UNICEF), 2015.                                                          | <a href="#">GHDx</a> |
| Malawi  | 850                  | 0                        | 9839                        | Malawi Demographic and Health Survey 2015-2016                | 2015-2016 | Emory University and Centers for Disease Control & Prevention Collaboration, ICF International, Ministry of Health (Malawi), National Statistical Office of Malawi. Malawi Demographic and Health Survey 2015-2016. Fairfax, United States of America: ICF International, 2017. | <a href="#">GHDx</a> |
| Malawi  | 1110                 | 0                        | 9459                        | Malawi Multiple Indicator Cluster Survey 2019-2020            | 2019-2020 | National Statistical Office of Malawi, United Nations Children's Fund (UNICEF). Malawi Multiple Indicator Cluster Survey 2019-2020.                                                                                                                                             | <a href="#">GHDx</a> |

| Country  | GPS-located clusters | Areally-located clusters | Number of children included | Series                                             | Years     | Citation                                                                                                                                                                                                                                                                                                   | Link                 |
|----------|----------------------|--------------------------|-----------------------------|----------------------------------------------------|-----------|------------------------------------------------------------------------------------------------------------------------------------------------------------------------------------------------------------------------------------------------------------------------------------------------------------|----------------------|
| Malaysia | 0                    | 16                       | 9510                        | Malaysia National Health and Morbidity Survey 2016 | 2016      | Institute for Public Health, Ministry of Health (Malaysia), National Institutes of Health (NIH). Malaysia National Health and Morbidity Survey 2016.                                                                                                                                                       | <a href="#">GHDx</a> |
| Niger    | 0                    | 8                        | 4649                        | Niger Multiple Indicator Cluster Survey 2000       | 2000      | Government of Niger, Macro International, Inc, United Nations Children's Fund (UNICEF). Niger Multiple Indicator Cluster Survey 2000. New York, United States of America: United Nations Children's Fund (UNICEF).                                                                                         | <a href="#">GHDx</a> |
| Niger    | 0                    | 8                        | 6994                        | Niger Demographic and Health Survey 2006           | 2006      | Department of Statistics and National Accounts (Niger), Macro International, Inc. Niger Demographic and Health Survey 2006. Fairfax, United States of America: ICF International.                                                                                                                          | <a href="#">GHDx</a> |
| Niger    | 476                  | 0                        | 11470                       | Niger Demographic and Health Survey 2012           | 2012      | ICF International, Ministry of Public Health (Niger), National Institute of Statistics (Niger). Niger Demographic and Health Survey 2012. Fairfax, United States of America: ICF International, 2019.                                                                                                      | <a href="#">GHDx</a> |
| Nigeria  | 0                    | 37                       | 15833                       | Nigeria Multiple Indicator Cluster Survey 2007     | 2007      | United Nations Children's Fund (UNICEF), National Bureau of Statistics (Nigeria). Nigeria Multiple Indicator Cluster Survey 2007. New York, United States: United Nations Children's Fund (UNICEF).                                                                                                        | <a href="#">GHDx</a> |
| Nigeria  | 359                  | 0                        | 5081                        | Nigeria Demographic and Health Survey 2003         | 2003      | Department for International Development (DFiD) (United Kingdom), National Population Commission of Nigeria, ORC Macro, United Nations Children's Fund (UNICEF), United Nations Population Fund (UNFPA). Nigeria Demographic and Health Survey 2003. Fairfax, United States of America: ICF International. | <a href="#">GHDx</a> |
| Nigeria  | 886                  | 0                        | 25203                       | Nigeria Demographic and Health Survey 2008         | 2008      | Macro International, Inc, National Population Commission of Nigeria. Nigeria Demographic and Health Survey 2008. Fairfax, United States of America: ICF International, 2009.                                                                                                                               | <a href="#">GHDx</a> |
| Nigeria  | 0                    | 37                       | 8235                        | Nigeria Living Standards Survey 2003-2004          | 2003-2004 | Federal Office of Statistics (Nigeria). Nigeria Living Standards Survey 2003-2004.                                                                                                                                                                                                                         | <a href="#">GHDx</a> |
| Nigeria  | 0                    | 37                       | 102                         | Nigeria Reproductive Health, Child Health, and     | 2005      | MEASURE Evaluation Project, Carolina Population Center, University of North Carolina, Center for Research, Evaluation, and Resource Development (CRERD), Center for Communication Programs, Bloomberg School of Public                                                                                     | <a href="#">GHDx</a> |

| Country | GPS-located clusters | Areally-located clusters | Number of children included | Series                                                                                                                                    | Years     | Citation                                                                                                                                                                                                                                                                                                                                                                                                                                                                                                                                                           | Link                 |
|---------|----------------------|--------------------------|-----------------------------|-------------------------------------------------------------------------------------------------------------------------------------------|-----------|--------------------------------------------------------------------------------------------------------------------------------------------------------------------------------------------------------------------------------------------------------------------------------------------------------------------------------------------------------------------------------------------------------------------------------------------------------------------------------------------------------------------------------------------------------------------|----------------------|
|         |                      |                          |                             | Education Household, School, and Health Facility Baseline Surveys 2005                                                                    |           | Health, Johns Hopkins, Creative Associates International, Constella Futures, Adolescent Health and Information Project (Nigeria), Federation of Muslim Women's Associations of Nigeria (FOMWAN), Nigerian Medical Association, Management Sciences for Health (MSH), Civil Society Action Coalition on Education For All. Nigeria Reproductive Health, Child Health, and Education Household, School, and Health Facility Baseline Surveys 2005. Chapel Hill, United States: MEASURE Evaluation Project, Carolina Population Center, University of North Carolina. |                      |
| Nigeria | 0                    | 37                       | 15906                       | Nigeria Multiple Indicator Cluster Survey 2011                                                                                            | 2011      | National Bureau of Statistics (Nigeria), United Nations Children's Fund (UNICEF). Nigeria Multiple Indicator Cluster Survey 2011. New York, United States of America: United Nations Children's Fund (UNICEF), 2013.                                                                                                                                                                                                                                                                                                                                               | <a href="#">GHDx</a> |
| Nigeria | 889                  | 0                        | 28207                       | Nigeria Demographic and Health Survey 2013                                                                                                | 2013      | ICF International, National Population Commission of Nigeria. Nigeria Demographic and Health Survey 2013. Fairfax, United States of America: ICF International.                                                                                                                                                                                                                                                                                                                                                                                                    | <a href="#">GHDx</a> |
| Nigeria | 0                    | 769                      | 17382                       | Nigeria Living Standards Survey 2008-2010                                                                                                 | 2008-2010 | National Bureau of Statistics (Nigeria). Nigeria Living Standards Survey 2008-2010. Abuja, Nigeria: National Bureau of Statistics (Nigeria).                                                                                                                                                                                                                                                                                                                                                                                                                       | <a href="#">GHDx</a> |
| Nigeria | 1381                 | 0                        | 18165                       | Nigeria Demographic and Health Survey 2018                                                                                                | 2018      | Federal Ministry of Health (Nigeria), ICF International, National Population Commission (NPC). Nigeria Demographic and Health Survey 2018. Fairfax, United States of America: ICF International, 2020.                                                                                                                                                                                                                                                                                                                                                             | <a href="#">GHDx</a> |
| Nigeria | 2198                 | 0                        | 16304                       | Nigeria Multiple Indicator Cluster Survey with National Immunization Coverage Survey Supplement 2016-2017 - National Bureau of Statistics | 2016-2017 | National Agency for the Control of AIDS (Nigeria), National Bureau of Statistics (Nigeria), National Primary Health Care Development Agency (NPHCDA) (Nigeria), United Nations Children's Fund (UNICEF). Nigeria Multiple Indicator Cluster Survey with National Immunization Coverage Survey Supplement 2016-2017 - National Bureau of Statistics. New York, United States of America: United Nations Children's Fund (UNICEF), 2018.                                                                                                                             | <a href="#">GHDx</a> |

| Country          | GPS-located clusters | Areally-located clusters | Number of children included | Series                                                                                                                   | Years     | Citation                                                                                                                                                                                                                                                                                 | Link                 |
|------------------|----------------------|--------------------------|-----------------------------|--------------------------------------------------------------------------------------------------------------------------|-----------|------------------------------------------------------------------------------------------------------------------------------------------------------------------------------------------------------------------------------------------------------------------------------------------|----------------------|
| Nigeria          | 0                    | 37                       | 6630                        | Nigeria National Nutrition and Health Survey 2018                                                                        | 2018      | Federal Ministry of Health (Nigeria), National Bureau of Statistics (Nigeria), National Population Commission of Nigeria. Nigeria National Nutrition and Health Survey 2018.                                                                                                             | <a href="#">GHDx</a> |
| Nigeria          | 0                    | 37                       | 4942                        | Nigeria Multiple Indicator Cluster Survey and National Immunization Coverage Survey 2021 - National Bureau of Statistics | 2021      | National Bureau of Statistics (Nigeria), United Nations Children's Fund (UNICEF). Nigeria Multiple Indicator Cluster Survey and National Immunization Coverage Survey 2021 - National Bureau of Statistics. New York, United States of America: United Nations Children's Fund (UNICEF). | <a href="#">GHDx</a> |
| Philippines      | 805                  | 0                        | 6864                        | Philippines Demographic and Health Survey 2003                                                                           | 2003      | Macro International, Inc, National Statistics Office (Philippines). Philippines Demographic and Health Survey 2003. Fairfax, United States of America: ICF International.                                                                                                                | <a href="#">GHDx</a> |
| Philippines      | 768                  | 0                        | 6336                        | Philippines Demographic and Health Survey 2008                                                                           | 2008      | Macro International, Inc, National Statistics Office (Philippines). Philippines Demographic and Health Survey 2008. Fairfax, United States of America: ICF International, 2010.                                                                                                          | <a href="#">GHDx</a> |
| Philippines      | 0                    | 17                       | 7004                        | Philippines Demographic and Health Survey 2013                                                                           | 2013      | ICF International, Philippines Statistics Authority. Philippines Demographic and Health Survey 2013. Fairfax, United States of America: ICF International, 2014.                                                                                                                         | <a href="#">GHDx</a> |
| Papua New Guinea | 0                    | 4                        | 1097                        | Papua New Guinea Demographic and Health Survey 2006-2007                                                                 | 2006-2007 | National Statistical Office (Papua New Guinea), National Statistics Office (Philippines). Papua New Guinea Demographic and Health Survey 2006-2007.                                                                                                                                      | <a href="#">GHDx</a> |
| Papua New Guinea | 722                  | 0                        | 5306                        | Papua New Guinea Demographic and Health Survey 2016-2018                                                                 | 2016-2018 | ICF International, National Statistical Office (Papua New Guinea). Papua New Guinea Demographic and Health Survey 2016-2018. Fairfax, United States of America: ICF International, 2019.                                                                                                 | <a href="#">GHDx</a> |

| Country | GPS-located clusters | Areally-located clusters | Number of children included | Series                                                         | Years     | Citation                                                                                                                                                                                                            | Link                 |
|---------|----------------------|--------------------------|-----------------------------|----------------------------------------------------------------|-----------|---------------------------------------------------------------------------------------------------------------------------------------------------------------------------------------------------------------------|----------------------|
| Rwanda  | 0                    | 12                       | 6710                        | Rwanda Demographic and Health Survey 2000                      | 2000      | Macro International, Inc, National Office of Population (Rwanda). Rwanda Demographic and Health Survey 2000. Fairfax, United States of America: ICF International.                                                  | <a href="#">GHDx</a> |
| Rwanda  | 456                  | 0                        | 7620                        | Rwanda Demographic and Health Survey 2005                      | 2005      | Macro International, Inc, National Institute of Statistics of Rwanda. Rwanda Demographic and Health Survey 2005. Fairfax, United States of America: ICF International.                                              | <a href="#">GHDx</a> |
| Rwanda  | 246                  | 0                        | 4996                        | Rwanda Interim Demographic and Health Survey 2007-2008         | 2007-2008 | Macro International, Inc, Ministry of Health (Rwanda), National Institute of Statistics of Rwanda. Rwanda Interim Demographic and Health Survey 2007-2008. Fairfax, United States of America: ICF International.    | <a href="#">GHDx</a> |
| Rwanda  | 0                    | 12                       | 3154                        | Rwanda Multiple Indicator Cluster Survey 2000                  | 2000      | Department of Statistics (Rwanda), United Nations Children's Fund (UNICEF). Rwanda Multiple Indicator Cluster Survey 2000. New York, United States: United Nations Children's Fund (UNICEF).                        | <a href="#">GHDx</a> |
| Rwanda  | 492                  | 0                        | 8480                        | Rwanda Demographic and Health Survey 2010-2011                 | 2010-2011 | ICF Macro, Ministry of Health (Rwanda), National Institute of Statistics of Rwanda. Rwanda Demographic and Health Survey 2010-2011. Fairfax, United States of America: ICF International.                           | <a href="#">GHDx</a> |
| Rwanda  | 0                    | 5                        | 8909                        | Rwanda Integrated Household Living Conditions Survey 2010-2011 | 2010-2011 | National Institute of Statistics of Rwanda. Rwanda Integrated Household Living Conditions Survey 2010-2011. Kigali, Rwanda: National Institute of Statistics of Rwanda.                                             | <a href="#">GHDx</a> |
| Rwanda  | 492                  | 0                        | 7553                        | Rwanda Demographic and Health Survey 2014-2015                 | 2014-2015 | ICF International, Ministry of Health (Rwanda), National Institute of Statistics of Rwanda. Rwanda Demographic and Health Survey 2014-2015. Fairfax, United States of America: ICF International, 2016.             | <a href="#">GHDx</a> |
| Rwanda  | 500                  | 0                        | 4729                        | Rwanda Demographic and Health                                  | 2019-2020 | Ministry of Health (Rwanda), National Institute of Statistics (Rwanda), Rwanda Biomedical Center (RBC). Rwanda Demographic and Health Survey 2019-2020. Fairfax, United States of America: ICF International, 2021. | <a href="#">GHDx</a> |

| Country | GPS-located clusters | Areally-located clusters | Number of children included | Series                                                            | Years     | Citation                                                                                                                                                                                                                                                                             | Link                 |
|---------|----------------------|--------------------------|-----------------------------|-------------------------------------------------------------------|-----------|--------------------------------------------------------------------------------------------------------------------------------------------------------------------------------------------------------------------------------------------------------------------------------------|----------------------|
|         |                      |                          |                             | Survey 2019-2020                                                  |           |                                                                                                                                                                                                                                                                                      |                      |
| Senegal | 366                  | 0                        | 9744                        | Senegal Demographic and Health Survey 2005                        | 2005      | Ministry of Health and Prevention (Senegal), Research Center for Human Development (Senegal). Senegal Demographic and Health Survey 2005. Fairfax, United States of America: ICF International.                                                                                      | <a href="#">GHDx</a> |
| Senegal | 385                  | 0                        | 11385                       | Senegal Demographic and Health Survey 2010-2011                   | 2010-2011 | Center for Research in Human Development (CRDH), Cheikh Anta Diop University, Hospital Aristide Le Dantec, ICF Macro, National Agency of Statistics and Demography (Senegal). Senegal Demographic and Health Survey 2010-2011. Fairfax, United States of America: ICF International. | <a href="#">GHDx</a> |
| Senegal | 200                  | 0                        | 6537                        | Senegal Continuous Demographic and Health Survey 2012-2013        | 2012-2013 | ICF International, Ministry of Health and Social Action (Senegal), National Agency of Statistics and Demography (Senegal). Senegal Continuous Demographic and Health Survey 2012-2013. Fairfax, United States of America: ICF International.                                         | <a href="#">GHDx</a> |
| Senegal | 196                  | 0                        | 6412                        | Senegal Continuous Demographic and Health Survey 2014             | 2014      | Cheikh Anta Diop University, ICF International, National Agency of Statistics and Demography (Senegal). Senegal Continuous Demographic and Health Survey 2014. Fairfax, United States of America: ICF International.                                                                 | <a href="#">GHDx</a> |
| Senegal | 214                  | 0                        | 6601                        | Senegal Continuous Demographic and Health Survey 2015             | 2015      | Cheikh Anta Diop University, ICF International, National Agency of Statistics and Demography (Senegal). Senegal Continuous Demographic and Health Survey 2015. Fairfax, United States of America: ICF International, 2016.                                                           | <a href="#">GHDx</a> |
| Senegal | 214                  | 0                        | 6413                        | Senegal Continuous Demographic and Health Survey 2016             | 2016      | ICF International, Ministry of Health and Social Action (Senegal), National Agency of Statistics and Demography (Senegal). Senegal Continuous Demographic and Health Survey 2016. Fairfax, United States of America: ICF International, 2017.                                        | <a href="#">GHDx</a> |
| Senegal | 0                    | 4                        | 2472                        | Senegal - Dakar Urban Multiple Indicator Cluster Survey 2015-2016 | 2015-2016 | National Agency of Statistics and Demography (Senegal), United Nations Children's Fund (UNICEF). Senegal - Dakar Urban Multiple Indicator Cluster Survey 2015-2016. New York, United States of America: United Nations Children's Fund (UNICEF), 2018.                               | <a href="#">GHDx</a> |
| Senegal | 400                  | 0                        | 7004                        | Senegal Continuous                                                | 2017      | ICF International, Ministry of Health and Social Action (Senegal), National Agency of Statistics and Demography                                                                                                                                                                      | <a href="#">GHDx</a> |

| Country      | GPS-located clusters | Areally-located clusters | Number of children included | Series                                                | Years | Citation                                                                                                                                                                                                                                                                                                                                              | Link                 |
|--------------|----------------------|--------------------------|-----------------------------|-------------------------------------------------------|-------|-------------------------------------------------------------------------------------------------------------------------------------------------------------------------------------------------------------------------------------------------------------------------------------------------------------------------------------------------------|----------------------|
|              |                      |                          |                             | Demographic and Health Survey 2017                    |       | (Senegal), Unit for the Fight Against Malnutrition (Senegal). Senegal Continuous Demographic and Health Survey 2017. Fairfax, United States of America: ICF International, 2018.                                                                                                                                                                      |                      |
| Senegal      | 0                    | 14                       | 3618                        | Senegal Continuous Demographic and Health Survey 2018 | 2018  | Directorate of Forecasting and Statistics, Ministry of the Economy, Finance and Planning (Senegal), ICF International, Ministry of Health and Social Action (Senegal), United States Agency for International Development (USAID). Senegal Continuous Demographic and Health Survey 2018. Fairfax, United States of America: ICF International, 2020. | <a href="#">GHDx</a> |
| Senegal      | 213                  | 0                        | 2503                        | Senegal Continuous Demographic and Health Survey 2019 | 2019  | ICF International, Ministry of Health and Social Action (Senegal), National Agency of Statistics and Demography (Senegal), United States Agency for International Development (USAID). Senegal Continuous Demographic and Health Survey 2019. Fairfax, United States of America: ICF International, 2020.                                             | <a href="#">GHDx</a> |
| Sierra Leone | 0                    | 4                        | 2680                        | Sierra Leone Multiple Indicator Cluster Survey 2000   | 2000  | Central Statistics Office (Sierra Leone), United Nations Children's Fund (UNICEF). Sierra Leone Multiple Indicator Cluster Survey 2000. New York, United States of America: United Nations Children's Fund (UNICEF).                                                                                                                                  | <a href="#">GHDx</a> |
| Sierra Leone | 0                    | 14                       | 5038                        | Sierra Leone Multiple Indicator Cluster Survey 2005   | 2005  | United Nations Children's Fund (UNICEF), Statistics Sierra Leone. Sierra Leone Multiple Indicator Cluster Survey 2005. New York, United States: United Nations Children's Fund (UNICEF).                                                                                                                                                              | <a href="#">GHDx</a> |
| Sierra Leone | 349                  | 0                        | 4892                        | Sierra Leone Demographic and Health Survey 2008       | 2008  | Macro International, Inc, Statistics Sierra Leone. Sierra Leone Demographic and Health Survey 2008. Fairfax, United States of America: ICF International.                                                                                                                                                                                             | <a href="#">GHDx</a> |
| Sierra Leone | 0                    | 14                       | 6783                        | Sierra Leone Multiple Indicator Cluster Survey 2010   | 2010  | Statistics Sierra Leone, United Nations Children's Fund (UNICEF). Sierra Leone Multiple Indicator Cluster Survey 2010. New York, United States of America: United Nations Children's Fund (UNICEF).                                                                                                                                                   | <a href="#">GHDx</a> |
| Sierra Leone | 435                  | 0                        | 10369                       | Sierra Leone Demographic and Health Survey 2013       | 2013  | ICF International, Ministry of Health and Sanitation (Sierra Leone), Statistics Sierra Leone. Sierra Leone Demographic and Health Survey 2013. Fairfax, United States of America: ICF International, 2014.                                                                                                                                            | <a href="#">GHDx</a> |
| Sierra Leone | 0                    | 14                       | 9665                        | Sierra Leone Multiple                                 | 2017  | Statistics Sierra Leone, United Nations Children's Fund (UNICEF). Sierra Leone Multiple Indicator Cluster Survey                                                                                                                                                                                                                                      | <a href="#">GHDx</a> |

| Country               | GPS-located clusters | Areally-located clusters | Number of children included | Series                                                                 | Years     | Citation                                                                                                                                                                                                                                                                                                                               | Link                 |
|-----------------------|----------------------|--------------------------|-----------------------------|------------------------------------------------------------------------|-----------|----------------------------------------------------------------------------------------------------------------------------------------------------------------------------------------------------------------------------------------------------------------------------------------------------------------------------------------|----------------------|
|                       |                      |                          |                             | Indicator Cluster Survey 2017                                          |           | 2017. New York, United States of America: United Nations Children's Fund (UNICEF), 2018.                                                                                                                                                                                                                                               |                      |
| Somalia               | 0                    | 18                       | 6103                        | Somalia Multiple Indicator Cluster Survey 2006                         | 2006      | Pan Arab Project for Family Health (PAPFAM), United Nations Children's Fund (UNICEF). Somalia Multiple Indicator Cluster Survey 2006. New York, United States of America: United Nations Children's Fund (UNICEF).                                                                                                                     | <a href="#">GHDx</a> |
| Somalia               | 245                  | 0                        | 4263                        | Somalia - Somaliland Multiple Indicator Cluster Survey 2011            | 2011      | Ministry of National Planning and Development (Somaliland), United Nations Children's Fund (UNICEF). Somalia - Somaliland Multiple Indicator Cluster Survey 2011. New York, United States of America: United Nations Children's Fund (UNICEF), 2015.                                                                                   | <a href="#">GHDx</a> |
| Somalia               | 276                  | 0                        | 4425                        | Somalia - Northeast Zone Multiple Indicator Cluster Survey 2011        | 2011      | Puntland Ministry of Planning and International Cooperation (Somalia), United Nations Children's Fund (UNICEF). Somalia - Northeast Zone Multiple Indicator Cluster Survey 2011. New York, United States of America: United Nations Children's Fund (UNICEF), 2015.                                                                    | <a href="#">GHDx</a> |
| South Sudan           | 0                    | 7                        | 1225                        | South Sudan Expanded Program on Immunization Coverage Survey 2017-2018 | 2017-2018 | Ministry of Health (South Sudan), South Sudan National Bureau of Statistics. South Sudan Expanded Program on Immunization Coverage Survey 2017-2018.                                                                                                                                                                                   | <a href="#">GHDx</a> |
| South Sudan           | 0                    | 10                       | 1403                        | Sudan - South Multiple Indicator Cluster Survey 2010                   | 2010      | Central Bureau of Statistics (Sudan), Federal Ministry of Health (Sudan), Government of Sudan, Ministry of Health (South Sudan), Southern Sudan Centre for Census, Statistics and Evaluation. Sudan - South Multiple Indicator Cluster Survey 2010. New York, United States of America: United Nations Children's Fund (UNICEF), 2015. | <a href="#">GHDx</a> |
| Sao Tome and Principe | 0                    | 7                        | 1684                        | Sao Tome and Principe Demographic and Health Survey 2008-2009          | 2008-2009 | ICF Macro, Ministry of Health (Sao Tome and Principe), National Institute of Statistics (Sao Tome and Principe). Sao Tome and Principe Demographic and Health Survey 2008-2009. Fairfax, United States of America: ICF International.                                                                                                  | <a href="#">GHDx</a> |

| Country               | GPS-located clusters | Areally-located clusters | Number of children included | Series                                                       | Years     | Citation                                                                                                                                                                                                                                                                                                                                                                                                                                            | Link                 |
|-----------------------|----------------------|--------------------------|-----------------------------|--------------------------------------------------------------|-----------|-----------------------------------------------------------------------------------------------------------------------------------------------------------------------------------------------------------------------------------------------------------------------------------------------------------------------------------------------------------------------------------------------------------------------------------------------------|----------------------|
| Sao Tome and Principe | 0                    | 4                        | 912                         | Sao Tome and Principe Multiple Indicator Cluster Survey 2000 | 2000      | National Institute of Statistics (Sao Tome and Principe), United Nations Children's Fund (UNICEF). Sao Tome and Principe Multiple Indicator Cluster Survey 2000. New York, United States of America: United Nations Children's Fund (UNICEF).                                                                                                                                                                                                       | <a href="#">GHDx</a> |
| Sao Tome and Principe | 0                    | 7                        | 1034                        | Sao Tome and Principe Multiple Indicator Cluster Survey 2014 | 2014      | Global Fund to Fight Aids Tuberculosis and Malaria (GFATM), ICF International, National Center for Endemic Diseases (CNE) (Sao Tome and Principe), National Institute of Statistics (Sao Tome and Principe), United Nations Children's Fund (UNICEF), United Nations Development Programme (UNDP). Sao Tome and Principe Multiple Indicator Cluster Survey 2014. New York, United States of America: United Nations Children's Fund (UNICEF), 2016. | <a href="#">GHDx</a> |
| Sao Tome and Principe | 0                    | 5                        | 861                         | Sao Tome and Principe Multiple Indicator Cluster Survey 2019 | 2019      | National Institute of Statistics (Sao Tome and Principe), United Nations Children's Fund (UNICEF). Sao Tome and Principe Multiple Indicator Cluster Survey 2019. New York, United States of America: United Nations Children's Fund (UNICEF), 2021.                                                                                                                                                                                                 | <a href="#">GHDx</a> |
| Chad                  | 0                    | 15                       | 4128                        | Chad Multiple Indicator Cluster Survey 2000                  | 2000      | United Nations Children's Fund (UNICEF), Census Bureau (Chad), National Institute of Statistical, Economic and Demographic Studies (Chad). Chad Multiple Indicator Cluster Survey 2000. New York, United States: United Nations Children's Fund (UNICEF).                                                                                                                                                                                           | <a href="#">GHDx</a> |
| Chad                  | 0                    | 9                        | 3652                        | Chad Demographic and Health Survey 2004                      | 2004      | Macro International, Inc, National Institute for Statistics, Economic and Demographic Studies (INSEED) (Chad). Chad Demographic and Health Survey 2004. Fairfax, United States of America: ICF International.                                                                                                                                                                                                                                       | <a href="#">GHDx</a> |
| Chad                  | 0                    | 60                       | 12026                       | Chad Multiple Indicator Cluster Survey 2010                  | 2010      | Ministry of Planning, Economy, and International Cooperation (Chad), National Institute for Statistics, Economic and Demographic Studies (INSEED) (Chad), United Nations Children's Fund (UNICEF). Chad Multiple Indicator Cluster Survey 2010. New York, United States of America: United Nations Children's Fund (UNICEF), 2014.                                                                                                                  | <a href="#">GHDx</a> |
| Chad                  | 624                  | 0                        | 16545                       | Chad Demographic and Health Survey 2014-2015                 | 2014-2015 | ICF International, National Institute for Statistics, Economic and Demographic Studies (INSEED) (Chad). Chad Demographic and Health Survey 2014-2015. Fairfax, United States of America: ICF International, 2016.                                                                                                                                                                                                                                   | <a href="#">GHDx</a> |

| Country  | GPS-located clusters | Areally-located clusters | Number of children included | Series                                                                                                                       | Years     | Citation                                                                                                                                                                                                                                                                           | Link                 |
|----------|----------------------|--------------------------|-----------------------------|------------------------------------------------------------------------------------------------------------------------------|-----------|------------------------------------------------------------------------------------------------------------------------------------------------------------------------------------------------------------------------------------------------------------------------------------|----------------------|
| Togo     | 0                    | 29                       | 2996                        | Togo Multiple Indicator Cluster Survey 2000                                                                                  | 2000      | United Nations Children's Fund (UNICEF). Togo Multiple Indicator Cluster Survey 2000. New York, United States of America: United Nations Children's Fund (UNICEF).                                                                                                                 | <a href="#">GHDx</a> |
| Togo     | 0                    | 6                        | 3410                        | Togo Multiple Indicator Cluster Survey 2006                                                                                  | 2006      | Directorate General of Statistics and National Accounting (Togo), United Nations Children's Fund (UNICEF). Togo Multiple Indicator Cluster Survey 2006. New York, United States: United Nations Children's Fund (UNICEF).                                                          | <a href="#">GHDx</a> |
| Togo     | 0                    | 6                        | 3975                        | Togo Multiple Indicator Cluster Survey 2010                                                                                  | 2010      | Directorate General of Statistics and National Accounting (Togo), United Nations Children's Fund (UNICEF). Togo Multiple Indicator Cluster Survey 2010. New York, United States: United Nations Children's Fund (UNICEF).                                                          | <a href="#">GHDx</a> |
| Togo     | 330                  | 0                        | 6521                        | Togo Demographic and Health Survey 2013-2014                                                                                 | 2013-2014 | Directorate General of Statistics and National Accounts (Togo), ICF International, Ministry of Health (Togo), Ministry of Planning, Development and Zoning (Togo). Togo Demographic and Health Survey 2013-2014. Fairfax, United States of America: ICF International, 2015.       | <a href="#">GHDx</a> |
| Togo     | 0                    | 5                        | 920                         | Incomplete immunization among children aged 12-23 months in Togo: a multilevel analysis of individual and contextual factors | 2017      | Ekouevi DK, Gbeasor-Komlanvi FA, Yaya I, Zida-Compaore WI, Boko A, Sewu E, Lacle A, Ndibu N, Toke Y, Landoh DE. Incomplete immunization among children aged 12-23 months in Togo: a multilevel analysis of individual and contextual factors. BMC Public Health. 2018; 18(1): 952. | <a href="#">GHDx</a> |
| Togo     | 409                  | 0                        | 2926                        | Togo Multiple Indicator Cluster Survey 2017                                                                                  | 2017      | Directorate General of Statistics and National Accounting (Togo), United Nations Children's Fund (UNICEF). Togo Multiple Indicator Cluster Survey 2017. New York, United States: United Nations Children's Fund (UNICEF).                                                          | <a href="#">GHDx</a> |
| Thailand | 0                    | 4                        | 5037                        | Thailand Multiple Indicator Cluster Survey 2005-2006                                                                         | 2005-2006 | National Statistical Office (Thailand), United Nations Children's Fund (UNICEF). Thailand Multiple Indicator Cluster Survey 2005-2006. New York, United States of America: United Nations Children's Fund (UNICEF).                                                                | <a href="#">GHDx</a> |
| Thailand | 0                    | 5                        | 4096                        | Thailand Multiple Indicator                                                                                                  | 2012      | College of Population Studies, Chulalongkorn University (Thailand), Institute for Population and Social Research, Mahidol University (Thailand), International Health Policy                                                                                                       | <a href="#">GHDx</a> |

| Country     | GPS-located clusters | Areally-located clusters | Number of children included | Series                                                                    | Years     | Citation                                                                                                                                                                                                                                                                                                                                                                                                                                                             | Link                 |
|-------------|----------------------|--------------------------|-----------------------------|---------------------------------------------------------------------------|-----------|----------------------------------------------------------------------------------------------------------------------------------------------------------------------------------------------------------------------------------------------------------------------------------------------------------------------------------------------------------------------------------------------------------------------------------------------------------------------|----------------------|
|             |                      |                          |                             | Cluster Survey 2012                                                       |           | Program (Thailand), Ministry of Education (Thailand), Ministry of Public Health (Thailand), Ministry of Social Development and Human Security (MSDHS) (Thailand), National Health Security Office (Thailand), National Statistical Office (Thailand), Thai Health Promotion Foundation, United Nations Children's Fund (UNICEF). Thailand Multiple Indicator Cluster Survey 2012. New York, United States of America: United Nations Children's Fund (UNICEF), 2016. |                      |
| Thailand    | 0                    | 5                        | 3023                        | Thailand Multiple Indicator Cluster Survey 2015-2016                      | 2015-2016 | National Health Security Office (Thailand), National Statistical Office (Thailand), United Nations Children's Fund (UNICEF). Thailand Multiple Indicator Cluster Survey 2015-2016. New York, United States of America: United Nations Children's Fund (UNICEF), 2018.                                                                                                                                                                                                | <a href="#">GHDx</a> |
| Thailand    | 0                    | 1                        | 503                         | Thailand - Bangkok Small Community Multiple Indicator Cluster Survey 2016 | 2016      | National Health Security Office (Thailand), National Statistical Office (Thailand), United Nations Children's Fund (UNICEF). Thailand - Bangkok Small Community Multiple Indicator Cluster Survey 2016. New York, United States of America: United Nations Children's Fund (UNICEF), 2018.                                                                                                                                                                           | <a href="#">GHDx</a> |
| Thailand    | 0                    | 77                       | 8602                        | Thailand Multiple Indicator Cluster Survey 2019                           | 2019      | National Health Security Office (Thailand), National Statistical Office (Thailand), United Nations Children's Fund (UNICEF). Thailand Multiple Indicator Cluster Survey 2019. New York, United States of America: United Nations Children's Fund (UNICEF), 2020.                                                                                                                                                                                                     | <a href="#">GHDx</a> |
| Timor-Leste | 0                    | 163                      | 4508                        | Timor-Leste Demographic and Health Survey 2003                            | 2003      | ACIL Australia Pty Ltd., Australian National University, Ministry of Health (Timor-Leste), National Statistics Directorate (Timor-Leste), University of Newcastle (Australia). Timor-Leste Demographic and Health Survey 2003. Newcastle, Australia: University of Newcastle (Australia).                                                                                                                                                                            | <a href="#">GHDx</a> |
| Timor-Leste | 0                    | 13                       | 8933                        | Timor-Leste Demographic and Health Survey 2009-2010                       | 2009-2010 | ICF Macro, Ministry of Finance (Timor-Leste), National Statistics Directorate (Timor-Leste). Timor-Leste Demographic and Health Survey 2009-2010. Fairfax, United States of America: ICF International.                                                                                                                                                                                                                                                              | <a href="#">GHDx</a> |

| Country                     | GPS-located clusters | Areally-located clusters | Number of children included | Series                                           | Years     | Citation                                                                                                                                                                                                                                                                                                                                                               | Link                 |
|-----------------------------|----------------------|--------------------------|-----------------------------|--------------------------------------------------|-----------|------------------------------------------------------------------------------------------------------------------------------------------------------------------------------------------------------------------------------------------------------------------------------------------------------------------------------------------------------------------------|----------------------|
| Timor-Leste                 | 455                  | 0                        | 4228                        | Timor-Leste Demographic and Health Survey 2016   | 2016      | ICF International, National Statistics Directorate (Timor-Leste). Timor-Leste Demographic and Health Survey 2016. Fairfax, United States of America: ICF International, 2018.                                                                                                                                                                                          | <a href="#">GHDx</a> |
| United Republic of Tanzania | 0                    | 26                       | 7594                        | Tanzania Demographic and Health Survey 2004-2005 | 2004-2005 | Macro International, Inc, National Bureau of Statistics (Tanzania). Tanzania Demographic and Health Survey 2004-2005. Fairfax, United States of America: ICF International.                                                                                                                                                                                            | <a href="#">GHDx</a> |
| United Republic of Tanzania | 458                  | 0                        | 7268                        | Tanzania Demographic and Health Survey 2009-2010 | 2009-2010 | ICF Macro, National Bureau of Statistics (Tanzania). Tanzania Demographic and Health Survey 2009-2010. Fairfax, United States of America: ICF International.                                                                                                                                                                                                           | <a href="#">GHDx</a> |
| United Republic of Tanzania | 0                    | 124                      | 2277                        | Tanzania National Panel Survey 2008-2009         | 2008-2009 | National Bureau of Statistics (Tanzania). Tanzania Living Standards Measurement Study - Integrated Survey on Agriculture 2008-2009. Dar es Salaam, Tanzania: National Bureau of Statistics (Tanzania).                                                                                                                                                                 | <a href="#">GHDx</a> |
| United Republic of Tanzania | 608                  | 0                        | 6090                        | Tanzania Demographic and Health Survey 2015-2016 | 2015-2016 | ICF International, Ministry of Health (Zanzibar), Ministry of Health, Community Development, Gender, Elderly and Children (MoHCDEC) (Tanzania), National Bureau of Statistics (Tanzania), Office of the Chief Government Statistician (OCGS) (Zanzibar). Tanzania Demographic and Health Survey 2015-2016. Fairfax, United States of America: ICF International, 2016. | <a href="#">GHDx</a> |
| Uganda                      | 269                  | 0                        | 5605                        | Uganda Demographic and Health Survey 2000-2001   | 2000-2001 | Macro International, Inc, Uganda Bureau of Statistics. Uganda Demographic and Health Survey 2000-2001. Fairfax, United States of America: ICF International.                                                                                                                                                                                                           | <a href="#">GHDx</a> |
| Uganda                      | 336                  | 0                        | 6931                        | Uganda Demographic and Health Survey 2006        | 2006      | Macro International, Inc, Uganda Bureau of Statistics. Uganda Demographic and Health Survey 2006. Fairfax, United States of America: ICF International.                                                                                                                                                                                                                | <a href="#">GHDx</a> |
| Uganda                      | 400                  | 0                        | 7253                        | Uganda Demographic and Health Survey 2011        | 2011      | ICF Macro, Uganda Bureau of Statistics. Uganda Demographic and Health Survey 2011. Fairfax, United States of America: ICF International.                                                                                                                                                                                                                               | <a href="#">GHDx</a> |
| Uganda                      | 0                    | 80                       | 6479                        | Uganda National                                  | 2008      | Ministry of Public Service (Uganda), Uganda Bureau of Statistics. Uganda National Service Delivery Survey 2008.                                                                                                                                                                                                                                                        | <a href="#">GHDx</a> |

| Country  | GPS-located clusters | Areally-located clusters | Number of children included | Series                                              | Years     | Citation                                                                                                                                                                                                              | Link                 |
|----------|----------------------|--------------------------|-----------------------------|-----------------------------------------------------|-----------|-----------------------------------------------------------------------------------------------------------------------------------------------------------------------------------------------------------------------|----------------------|
|          |                      |                          |                             | Service Delivery Survey 2008                        |           |                                                                                                                                                                                                                       |                      |
| Uganda   | 685                  | 0                        | 8769                        | Uganda Demographic and Health Survey 2016           | 2016      | ICF International, Uganda Bureau of Statistics. Uganda Demographic and Health Survey 2016. Fairfax, United States of America: ICF International, 2018.                                                                | <a href="#">GHDx</a> |
| Viet Nam | 0                    | 8                        | 2974                        | Vietnam Multiple Indicator Cluster Survey 2000      | 2000      | General Statistics Office (Vietnam), United Nations Children's Fund (UNICEF). Vietnam Multiple Indicator Cluster Survey 2000. New York, United States of America: United Nations Children's Fund (UNICEF).            | <a href="#">GHDx</a> |
| Viet Nam | 0                    | 8                        | 2578                        | Vietnam Multiple Indicator Cluster Survey 2006      | 2006      | General Statistics Office (Vietnam), United Nations Children's Fund (UNICEF). Vietnam Multiple Indicator Cluster Survey 2006. New York, United States of America: United Nations Children's Fund (UNICEF).            | <a href="#">GHDx</a> |
| Viet Nam | 0                    | 41                       | 1235                        | Vietnam Demographic and Health Survey 2002          | 2002      | General Statistics Office (Vietnam), Macro International, Inc. Vietnam Demographic and Health Survey 2002. Fairfax, United States of America: ICF International.                                                      | <a href="#">GHDx</a> |
| Viet Nam | 0                    | 587                      | 3603                        | Vietnam Multiple Indicator Cluster Survey 2010-2011 | 2010-2011 | General Statistics Office (Vietnam), United Nations Children's Fund (UNICEF). Vietnam Multiple Indicator Cluster Survey 2010-2011. New York, United States of America: United Nations Children's Fund (UNICEF).       | <a href="#">GHDx</a> |
| Viet Nam | 0                    | 500                      | 2072                        | Vietnam Multiple Indicator Cluster Survey 2013-2014 | 2013-2014 | General Statistics Office (Vietnam), United Nations Children's Fund (UNICEF). Vietnam Multiple Indicator Cluster Survey 2013-2014. New York, United States of America: United Nations Children's Fund (UNICEF), 2015. | <a href="#">GHDx</a> |
| Yemen    | 0                    | 443                      | 6152                        | Yemen Family Health Survey 2003                     | 2003      | Central Statistical Organization (Yemen), League of Arab States, Ministry of Public Health and Population (Yemen), Pan Arab Project for Family Health (PAPFAM). Yemen Family Health Survey 2003.                      | <a href="#">GHDx</a> |
| Yemen    | 0                    | 21                       | 3360                        | Yemen Multiple Indicator Cluster Survey 2006        | 2006      | Ministry of Health (Yemen) and United Nations Children's Fund (UNICEF). Yemen Multiple Indicator Cluster Survey 2006. New York, United States: United Nations Children's Fund (UNICEF).                               | <a href="#">GHDx</a> |

| Country | GPS-located clusters | Areally-located clusters | Number of children included | Series                                                   | Years     | Citation                                                                                                                                                                                                       | Link                 |
|---------|----------------------|--------------------------|-----------------------------|----------------------------------------------------------|-----------|----------------------------------------------------------------------------------------------------------------------------------------------------------------------------------------------------------------|----------------------|
| Yemen   | 0                    | 489                      | 10932                       | Yemen Household Budget Survey 2005-2006                  | 2005-2006 | Central Statistical Organization (Yemen). Yemen Household Budget Survey 2005-2006. Sana'a, Yemen: Central Statistical Organization (Yemen).                                                                    | <a href="#">GHDx</a> |
| Yemen   | 0                    | 528                      | 14906                       | Yemen Demographic and Health Survey 2013                 | 2013      | Central Statistical Organization (Yemen), ICF International, Ministry of Public Health and Population (Yemen). Yemen Demographic and Health Survey 2013. Fairfax, United States of America: ICF International. | <a href="#">GHDx</a> |
| Zambia  | 0                    | 72                       | 5726                        | Zambia Living Conditions Monitoring Survey 2002-2003     | 2002-2003 | Central Statistical Office (Zambia). Zambia Living Conditions Monitoring Survey 2002-2003. Lusaka, Zambia: Central Statistical Office (Zambia).                                                                | <a href="#">GHDx</a> |
| Zambia  | 0                    | 132                      | 8478                        | Zambia Living Conditions Monitoring Survey 2004-2005     | 2004-2005 | Central Statistical Office (Zambia). Zambia Living Conditions Monitoring Survey 2004-2005. Lusaka, Zambia: Central Statistical Office (Zambia).                                                                | <a href="#">GHDx</a> |
| Zambia  | 0                    | 72                       | 5982                        | Zambia Demographic and Health Survey 2001-2002           | 2001-2002 | Central Board of Health (Zambia), Central Statistical Office (Zambia), Macro International, Inc. Zambia Demographic and Health Survey 2001-2002. Fairfax, United States of America: ICF International.         | <a href="#">GHDx</a> |
| Zambia  | 319                  | 0                        | 5844                        | Zambia Demographic and Health Survey 2007                | 2007      | Central Statistical Office (Zambia), Macro International, Inc. Zambia Demographic and Health Survey 2007. Fairfax, United States of America: ICF International.                                                | <a href="#">GHDx</a> |
| Zambia  | 0                    | 22                       | 1155                        | Zambia Global Fund Household Health Coverage Survey 2008 | 2008      | Central Statistical Office (Zambia). Zambia Global Fund Household Health Coverage Survey 2008. Lusaka, Zambia: Central Statistical Office (Zambia).                                                            | <a href="#">GHDx</a> |
| Zambia  | 0                    | 146                      | 2829                        | Zambia Living Conditions Monitoring Survey 2010          | 2010      | Central Statistical Office (Zambia). Zambia Living Conditions Monitoring Survey 2010.                                                                                                                          | <a href="#">GHDx</a> |
| Zambia  | 719                  | 0                        | 12654                       | Zambia Demographic and Health                            | 2013-2014 | Central Statistical Office (Zambia), ICF International, Ministry of Health (Zambia), Tropical Diseases Research Centre, University Teaching Hospital (Zambia), University of Zambia.                           | <a href="#">GHDx</a> |

| Country | GPS-located clusters | Areally-located clusters | Number of children included | Series                                          | Years     | Citation                                                                                                                                                                                                                                                      | Link                 |
|---------|----------------------|--------------------------|-----------------------------|-------------------------------------------------|-----------|---------------------------------------------------------------------------------------------------------------------------------------------------------------------------------------------------------------------------------------------------------------|----------------------|
|         |                      |                          |                             | Survey 2013-2014                                |           | Zambia Demographic and Health Survey 2013-2014. Fairfax, United States of America: ICF International.                                                                                                                                                         |                      |
| Zambia  | 0                    | 72                       | 4259                        | Zambia Living Conditions Monitoring Survey 2015 | 2015      | Central Statistical Office (Zambia), World Bank. Zambia Living Conditions Monitoring Survey 2015.                                                                                                                                                             | <a href="#">GHDx</a> |
| Zambia  | 535                  | 0                        | 5665                        | Zambia Demographic and Health Survey 2018-2019  | 2018-2019 | Central Statistical Office (Zambia), ICF International, Ministry of Health (Zambia), University Teaching Hospital (Zambia), University of Zambia. Zambia Demographic and Health Survey 2018-2019. Fairfax, United States of America: ICF International, 2020. | <a href="#">GHDx</a> |

3

*Supplemental Table S3: Surveys excluded from DTP modeling.*

| Country       | Series                                                         | Year(s)   | Citation                                                                                                                                                                                                                                 | Rationale for exclusion                                                                                                                                                                                                                                                |
|---------------|----------------------------------------------------------------|-----------|------------------------------------------------------------------------------------------------------------------------------------------------------------------------------------------------------------------------------------------|------------------------------------------------------------------------------------------------------------------------------------------------------------------------------------------------------------------------------------------------------------------------|
| Angola        | Angola Core Welfare Indicators Questionnaire Survey 2011       | 2011      | Ministry of Planning and Territorial Development (Angola), National Institute of Statistics (Angola). Angola Core Welfare Indicators Questionnaire Survey 2011. Luanda, Angola: National Institute of Statistics (Angola).               | Estimates considered implausible. Survey estimates are systematically low compared to admin estimates and other sources.                                                                                                                                               |
| Benin         | Benin Demographic and Health Survey 2011-2012                  | 2011-2012 | ICF International, National Institute of Statistics and Economic Analysis (INSAE) (Benin), National Program Against AIDS (PNLS) (Benin). Benin Demographic and Health Survey 2011-2012. Fairfax, United States: ICF International, 2014. | Estimates considered implausible. Survey estimates are systematically low compared to admin estimates and estimates from other established survey series (2009-2012 Benin Health Statistical Yearbook, 2008 External Review of the Extended Programme on Immunisation) |
| Djibouti      | Djibouti Family Health Survey 2002                             | 2002      | Department of Statistics and Demographic Studies (Djibouti), League of Arab States, Ministry of Health (Djibouti), Pan Arab Project for Family Health (PAPFAM). Djibouti Family Health Survey 2002.                                      | Estimates considered implausible. Survey estimates are systematically high compared to admin estimates and other source for all cohorts except 12-23 and 24-35 months cohort                                                                                           |
| Ethiopia      | Ethiopia Welfare Monitoring Survey 2004                        | 2004      | Central Statistical Agency (Ethiopia). Ethiopia Welfare Monitoring Survey 2004.                                                                                                                                                          | Estimates considered implausible. Survey estimates are systematically high compared to admin estimates and estimates from other established surveys series (2001-2003 DHS, 2001 National EPI Coverage Survey)                                                          |
| Ghana         | Ghana Living Standards Measurement Survey 2012-2013            | 2012-2013 | Ghana Statistical Service, World Bank. Ghana Living Standards Measurement Survey 2012-2013. Accra, Ghana: Ghana Statistical Service.                                                                                                     | Estimates considered implausible. Survey estimates are systematically low compared to admin estimates and other sources.                                                                                                                                               |
| Indonesia     | Indonesia National Socioeconomic Survey 2006                   | 2004-2013 | Statistics Indonesia. Indonesia National Socioeconomic Survey 2006.                                                                                                                                                                      | Estimates considered implausible. Survey estimates are inconsistent with admin estimates and estimates from other established survey series (2007-2008 Indonesia Family Life Survey, 2003-2005 DHS)                                                                    |
| Indonesia     | Indonesia Family Life Survey East 2012                         | 2012      | National Team for the Acceleration of Poverty Reduction (TNP2K) (Indonesia), SurveyMETER, University of Southern California, World Bank. Indonesia Family Life Survey East 2012.                                                         | Estimates considered implausible. Survey estimates are inconsistent with admin estimates and estimates from other established survey series (2008-2011 DHS)                                                                                                            |
| Burkina Faso  | Burkina Faso Core Welfare Indicators Questionnaire Survey 2007 | 2007      | National Institute of Statistics and Demography (INSD). Burkina Faso Core Welfare Indicators Questionnaire Survey 2007. Ouagadougou, Burkina Faso: National Institute of Statistics and Demography (INSD), 2008.                         | Estimates considered implausible. Survey estimates are inconsistent with admin estimates and estimates from other established survey series (Burkina Faso Multiple Indicator Cluster Survey 2006, Burkina Faso Demographic and Health Survey 2003)                     |
| Burkina Faso  | Burkina Faso Core Welfare Indicators Questionnaire Survey 2005 | 2005      | National Institute of Statistics and Demography (Burkina Faso), World Bank. Burkina Faso Core Welfare Indicators Questionnaire Survey 2005. Ouagadougou, Burkina Faso: National Institute of Statistics and Demography (Burkina Faso).   | Estimates considered implausible. Survey estimates are inconsistent with admin estimates and estimates from other established survey series (Burkina Faso Multiple Indicator Cluster Survey 2006, Burkina Faso Demographic and Health Survey 2003)                     |
| Cote d'Ivoire | Cote d'Ivoire Multiple Indicator Cluster Survey 2016           | 2016      | National Institute of Statistics (Côte d'Ivoire), United Nations Children's Fund (UNICEF). Cote d'Ivoire Multiple Indicator Cluster Survey 2016. New York, United States of America: United Nations Children's Fund (UNICEF), 2018.      | Estimates outliered due to implausibly high coverage values in some data points (100%)                                                                                                                                                                                 |
| Cameroon      | Cameroon Multiple                                              | 2014      | Ministry of Public Health (Cameroon), National Institute of Statistics (Cameroon), United Nations Children's Fund                                                                                                                        | Coverage is implausibly high for the 48-59 months cohort compared to estimates for other cohorts of this MICS                                                                                                                                                          |

| Country       | Series                                               | Year(s)   | Citation                                                                                                                                                                                                                                          | Rationale for exclusion                                                                                                                                                                             |
|---------------|------------------------------------------------------|-----------|---------------------------------------------------------------------------------------------------------------------------------------------------------------------------------------------------------------------------------------------------|-----------------------------------------------------------------------------------------------------------------------------------------------------------------------------------------------------|
|               | Indicator Cluster Survey 2014                        |           | (UNICEF). Cameroon Multiple Indicator Cluster Survey 2014. New York, United States of America: United Nations Children's Fund (UNICEF), 2017.                                                                                                     |                                                                                                                                                                                                     |
| Congo         | Congo Demographic and Health Survey 2005             | 2005      | Macro International, Inc, National Center for Statistics and Economic Studies (Congo, Rep.). Congo Demographic and Health Survey 2005. Fairfax, United States of America: ICF International.                                                      | Coverage patterns suggest strong influence of catch-up vaccination rather than on-schedule routine immunization                                                                                     |
| Ghana         | Ghana Socioeconomic Panel Survey 2009-2010           | 2009-2010 | Economic Growth Center, Yale University, Institute of Statistical, Social and Economic Research, University of Ghana. Ghana Socioeconomic Panel Survey 2009-2010. Washington DC, United States: World Bank.                                       | Estimates outliered due to implausible coverage, including values of both 100% and 0% coverage in 2000                                                                                              |
| Guinea-Bissau | Guinea-Bissau Multiple Indicator Cluster Survey 2000 | 2000      | Secretary State of Planning, National Institute of Statistics and Census (INEC), United Nations Children's Fund (UNICEF). Guinea-Bissau Multiple Indicator Cluster Survey 2000. New York, United States: United Nations Children's Fund (UNICEF). | Estimates outliered due to a large observed cohort effect (24-25 months cohort).                                                                                                                    |
| Indonesia     | Indonesia National Socioeconomic Survey 2005         | 2005      | Statistics Indonesia. Indonesia National Socioeconomic Survey 2005.                                                                                                                                                                               | Estimates considered implausible. Survey estimates are inconsistent with admin estimates and estimates from other established survey series (2007-2008 Indonesia Family Life Survey, 2003-2005 DHS) |
| Indonesia     | Indonesia National Socioeconomic Survey 2004         | 2004      | Statistics Indonesia. Indonesia National Socioeconomic Survey 2004.                                                                                                                                                                               | Estimates considered implausible. Survey estimates are inconsistent with admin estimates and estimates from other established survey series (2007-2008 Indonesia Family Life Survey, 2003-2005 DHS) |
| Indonesia     | Indonesia National Socioeconomic Survey 2007         | 2007      | Statistics Indonesia. Indonesia National Socioeconomic Survey 2007.                                                                                                                                                                               | Estimates considered implausible. Survey estimates are inconsistent with admin estimates and estimates from other established survey series (2007-2008 Indonesia Family Life Survey, 2003-2005 DHS) |
| Indonesia     | Indonesia National Socioeconomic Survey 2010         | 2010      | Statistics Indonesia. Indonesia National Socioeconomic Survey 2010.                                                                                                                                                                               | Estimates considered implausible. Survey estimates are inconsistent with admin estimates and estimates from other established survey series (2007-2008 Indonesia Family Life Survey, 2003-2005 DHS) |
| Indonesia     | Indonesia National Socioeconomic Survey 2008         | 2008      | Statistics Indonesia. Indonesia National Socioeconomic Survey 2008.                                                                                                                                                                               | Estimates considered implausible. Survey estimates are inconsistent with admin estimates and estimates from other established survey series (2007-2008 Indonesia Family Life Survey, 2003-2005 DHS) |
| Indonesia     | Indonesia National Socioeconomic Survey 2009         | 2009      | Statistics Indonesia. Indonesia National Socioeconomic Survey 2009.                                                                                                                                                                               | Estimates considered implausible. Survey estimates are inconsistent with admin estimates and estimates from other established survey series (2007-2008 Indonesia Family Life Survey, 2003-2005 DHS) |
| Indonesia     | Indonesia National Socioeconomic Survey 2011         | 2011      | Statistics Indonesia. Indonesia National Socioeconomic Survey 2011.                                                                                                                                                                               | Estimates considered implausible. Survey estimates are inconsistent with admin estimates and estimates from other established survey series (2007-2008 Indonesia Family Life Survey, 2003-2005 DHS) |
| Indonesia     | Indonesia National Socioeconomic Survey 2012         | 2012      | Statistics Indonesia. Indonesia National Socioeconomic Survey 2012.                                                                                                                                                                               | Estimates considered implausible. Survey estimates are inconsistent with admin estimates and estimates from other established survey series (2007-2008 Indonesia Family Life Survey, 2003-2005 DHS) |

| Country    | Series                                                                         | Year(s)   | Citation                                                                                                                                                                                                                                                                                                                                                                      | Rationale for exclusion                                                                                                                                                                                                                          |
|------------|--------------------------------------------------------------------------------|-----------|-------------------------------------------------------------------------------------------------------------------------------------------------------------------------------------------------------------------------------------------------------------------------------------------------------------------------------------------------------------------------------|--------------------------------------------------------------------------------------------------------------------------------------------------------------------------------------------------------------------------------------------------|
| Indonesia  | Indonesia National Socioeconomic Survey 2013                                   | 2013      | Statistics Indonesia. Indonesia National Socioeconomic Survey 2013.                                                                                                                                                                                                                                                                                                           | Estimates considered implausible. Survey estimates are inconsistent with admin estimates and estimates from other established survey series (2007-2008 Indonesia Family Life Survey, 2003-2005 DHS)                                              |
| Indonesia  | Indonesia Basic Health Research 2018                                           | 2018      | Agency of Health Research and Development (Indonesia). Indonesia Basic Health Research 2018.                                                                                                                                                                                                                                                                                  | Estimates considered implausible. Survey estimates are inconsistent with admin estimates and estimates from other established surveys (2017 DHS)                                                                                                 |
| Kenya      | Kenya Demographic and Health Survey 2003                                       | 2003      | Centers for Disease Control and Prevention (CDC), Central Bureau of Statistics (Kenya), Macro International, Inc, Ministry of Health (Kenya), National Council for Population and Development (Kenya). Kenya Demographic and Health Survey 2003. Fairfax, United States of America: ICF International.                                                                        | Estimates considered implausible. Survey estimates are systematically low compared to admin estimates and estimates from other established survey series (2005-2006 Kenya Integrated Household Budget Survey, 2004-2006 DHS)                     |
| Kenya      | Kenya - North Eastern Province Multiple Indicator Cluster Survey 2007          | 2007      | Kenya National Bureau of Statistics, United Nations Children's Fund (UNICEF). Kenya - North Eastern Province Multiple Indicator Cluster Survey 2007. Nairobi, Kenya: Kenya National Bureau of Statistics.                                                                                                                                                                     | Estimates considered implausible. Survey estimates are systematically low compared to admin estimates and estimates from other established survey series (2005-2006 Kenya Integrated Household Budget Survey, 2004-2006 DHS)                     |
| Cambodia   | Cambodia Socio-Economic Survey 2009                                            | 2009      | National Institute of Statistics (Cambodia), Statistics Sweden. Cambodia Socio-Economic Survey 2009. Phnom Penh, Cambodia: National Institute of Statistics (Cambodia).                                                                                                                                                                                                       | Estimates considered implausible. Survey estimates are inconsistent with admin estimates and estimates from other established survey series (Cambodia Demographic and Health Survey 2005-2006, Cambodia Demographic and Health Survey 2010-2011) |
| Madagascar | Madagascar Multiple Indicator Cluster Survey 2000                              | 2000      | National Institute of Statistics (Madagascar), United Nations Children's Fund (UNICEF). Madagascar Multiple Indicator Cluster Survey 2000. New York, United States of America: United Nations Children's Fund (UNICEF).                                                                                                                                                       | Estimates outliered due to implausibly low coverage                                                                                                                                                                                              |
| Mali       | Mali Multiple Indicator Cluster Survey 2009-2010                               | 2009-2010 | Ministry of Health (Mali), National Institute of Statistics (INSTAT) (Mali), United Nations Children's Fund (UNICEF). Mali Multiple Indicator Cluster Survey 2009-2010. New York, United States of America: United Nations Children's Fund (UNICEF), 2017.                                                                                                                    | Estimates considered implausible. Survey estimates are inconsistent with both admin estimates and estimates from other established survey series (2008-2011 DHS, 2010-2013 World Bank Living Standards Measurement Survey)                       |
| Niger      | Niger National Survey on Household Living Conditions and Agriculture 2014-2015 | 2014-2015 | National Institute of Statistics (Niger), World Bank. Niger National Survey on Household Living Conditions and Agriculture 2014-2015. Washington DC, United States of America: World Bank.                                                                                                                                                                                    | Estimates outliered due to reliability concerns, survey design, and implausibly low coverage                                                                                                                                                     |
| Nigeria    | Nigeria General Household Survey 2007                                          | 2007      | Central Bank of Nigeria, National Bureau of Statistics (Nigeria), Nigerian Communications Commission (NCC). Nigeria General Household Survey 2007. Abuja, Nigeria: National Bureau of Statistics (Nigeria).                                                                                                                                                                   | Estimates considered implausible. Survey estimates are systematically low compared to admin estimates and estimates from other established survey series (1999-2007 DHS, 2007/2010 MICS)                                                         |
| Nigeria    | Nigeria Reproductive Health, Child Health, and Education Household,            | 2007      | MEASURE Evaluation Project, Carolina Population Center, University of North Carolina, Center for Research, Evaluation, and Resource Development (CRERD), Center for Communication Programs, Bloomberg School of Public Health, Johns Hopkins, Creative Associates International, Constella Futures, Adolescent Health and Information Project (Nigeria), Federation of Muslim | Estimates considered implausible. Survey estimates are inconsistent with both admin estimates and estimates from other established survey series (1999-2007 DHS, 2007-2010 MICS)                                                                 |

| Country               | Series                                                       | Year(s)   | Citation                                                                                                                                                                                                                                                                                                                                                                                                   | Rationale for exclusion                                                                                                                                                                                                                                                                                                                                                                                                                                                            |
|-----------------------|--------------------------------------------------------------|-----------|------------------------------------------------------------------------------------------------------------------------------------------------------------------------------------------------------------------------------------------------------------------------------------------------------------------------------------------------------------------------------------------------------------|------------------------------------------------------------------------------------------------------------------------------------------------------------------------------------------------------------------------------------------------------------------------------------------------------------------------------------------------------------------------------------------------------------------------------------------------------------------------------------|
|                       | School, and Health Facility Midline Surveys 2007             |           | Women's Associations of Nigeria (FOMWAN), Nigerian Medical Association, Management Sciences for Health (MSH), Civil Society Action Coalition on Education For All. Nigeria Reproductive Health, Child Health, and Education Household, School, and Health Facility Midline Surveys 2007. Chapel Hill, United States: MEASURE Evaluation Project, Carolina Population Center, University of North Carolina. |                                                                                                                                                                                                                                                                                                                                                                                                                                                                                    |
| Nigeria               | Nigeria General Household Survey, Panel 2012-2013, Wave 2    | 2012-2013 | National Bureau of Statistics (Nigeria). Nigeria General Household Survey, Panel 2012-2013, Wave 2. Washington DC, United States of America: World Bank.                                                                                                                                                                                                                                                   | Estimates considered implausible. Survey estimates are systematically high compared to admin estimates and estimates from other established survey series (2009 DHS, 2009 MICS, 2009 Nigeria Reproductive Health, Child Health, and Education Household, School, and Health Facility Survey, 2009-2012 Nigeria Annual Abstract of Statistics)                                                                                                                                      |
| Nigeria               | Nigeria General Household Survey 2010-2011                   | 2010-2011 | National Bureau of Statistics (Nigeria). Nigeria General Household Survey 2010-2011. Abuja, Nigeria: National Bureau of Statistics (Nigeria).                                                                                                                                                                                                                                                              | Estimates considered implausible. Survey estimates are systematically high compared to admin estimates and estimates from other established survey series (2009 DHS, 2009 MICS, 2009 Nigeria Reproductive Health, Child Health, and Education Household, School, and Health Facility Survey, 2009-2012 Nigeria Annual Abstract of Statistics)                                                                                                                                      |
| Philippines           | Philippines Demographic and Health Survey 2017               | 2017      | ICF International, Philippines Statistics Authority, United States Agency for International Development (USAID). Philippines Demographic and Health Survey 2017. Fairfax, United States of America: ICF International, 2018.                                                                                                                                                                               | Estimates considered implausible. Some survey estimates are systematically low compared those in other locations in the same survey.                                                                                                                                                                                                                                                                                                                                               |
| Senegal               | Senegal Continuous Demographic and Health Survey 2019        | 2019      | ICF International, Ministry of Health and Social Action (Senegal), National Agency of Statistics and Demography (Senegal), United States Agency for International Development (USAID). Senegal Continuous Demographic and Health Survey 2019. Fairfax, United States of America: ICF International, 2020.                                                                                                  | Coverage patterns in data suggest strong influence of catch-up vaccination after 2018 health workers strike rather than on-schedule routine immunization                                                                                                                                                                                                                                                                                                                           |
| Sao Tome and Principe | Sao Tome and Principe Multiple Indicator Cluster Survey 2000 | 2000      | National Institute of Statistics (Sao Tome and Principe), United Nations Children's Fund (UNICEF). Sao Tome and Principe Multiple Indicator Cluster Survey 2000. New York, United States of America: United Nations Children's Fund (UNICEF).                                                                                                                                                              | Coverage patterns in data suggest strong influence of catch-up vaccination rather than routine immunization                                                                                                                                                                                                                                                                                                                                                                        |
| Uganda                | Uganda National Service Delivery Survey 2004                 | 2004      | Ministry of Public Service (Uganda), Uganda Bureau of Statistics. Uganda National Service Delivery Survey 2004. OpenMicroData.                                                                                                                                                                                                                                                                             | Estimates considered implausible. Survey estimates are systematically high compared to estimates from other established surveys over the same period (Uganda Demographic and Health Survey 2000-2001, Uganda Demographic and Health Survey 2011). Also, some households were not covered due to insecurity in the districts of Gulu, Lira, Katakwi, Kitgum, and Pader; while in Karamoja region (Kotido, Nakapiripirit and Moroto) due to mobility of the pastoralist communities. |
| Uganda                | Uganda Gavi FCE Household Survey 2015                        | 2015      | Institute for Health Metrics and Evaluation (IHME), Infectious Diseases Research Collaboration (IDRC). Uganda Gavi FCE Household Survey 2015. Seattle, United States: Institute for Health Metrics and Evaluation (IHME), 2017.                                                                                                                                                                            | Estimates considered implausible. Survey estimates are inconsistent with both admin estimates and estimates from other established survey series (2016 DHS)                                                                                                                                                                                                                                                                                                                        |
| Yemen                 | Yemen - Aden Nutritional Status and                          | 2015      | Ministry of Public Health and Population (Yemen), Yemen UNICEF, Field Medical Foundation. Yemen - Aden Nutrition and Mortality Survey 2015.                                                                                                                                                                                                                                                                | Estimates considered implausible. Survey estimates include implausibly high coverage rates of >100%                                                                                                                                                                                                                                                                                                                                                                                |

| Country | Series                                                       | Year(s) | Citation                                                                                                                                            | Rationale for exclusion                                                                                                                                                                                   |
|---------|--------------------------------------------------------------|---------|-----------------------------------------------------------------------------------------------------------------------------------------------------|-----------------------------------------------------------------------------------------------------------------------------------------------------------------------------------------------------------|
|         | Mortality Survey 2015                                        |         |                                                                                                                                                     |                                                                                                                                                                                                           |
| Yemen   | Yemen - Ibb Nutritional Status and Mortality Survey 2012     | 2012    | Ministry of Public Health and Population (Yemen), Yemen UNICEF. Yemen - Ibb Nutrition and Mortality Survey 2012.                                    | Estimates considered implausible. Survey estimates include implausibly high coverage rates of >100%                                                                                                       |
| Yemen   | Yemen - Mahweet Nutritional Status and Mortality Survey 2013 | 2013    | Ministry of Public Health and Population (Yemen), Yemen UNICEF. Yemen - Mahweet Nutrition and Mortality Survey 2013.                                | Estimates considered implausible. Survey estimates include implausibly high coverage rates of >100%                                                                                                       |
| Zambia  | Zambia Global Fund Household Health Coverage Survey 2008     | 2008    | Central Statistical Office (Zambia). Zambia Global Fund Household Health Coverage Survey 2008. Lusaka, Zambia: Central Statistical Office (Zambia). | Estimates considered implausible for 24-35 and 36-47 cohort. Survey estimates are systematically low compared to admin estimates and estimates from other established survey series (DHS 2007, LCMS 2010) |

*Supplemental Table S4: GATHER Compliance checklist*

| Item number                                                                                           | Checklist item                                                                                                                                                                                                                                                                                                                                | Reported on page number(s):                                                                                                                                                              |
|-------------------------------------------------------------------------------------------------------|-----------------------------------------------------------------------------------------------------------------------------------------------------------------------------------------------------------------------------------------------------------------------------------------------------------------------------------------------|------------------------------------------------------------------------------------------------------------------------------------------------------------------------------------------|
| <b>Objectives and funding</b>                                                                         |                                                                                                                                                                                                                                                                                                                                               |                                                                                                                                                                                          |
| 1                                                                                                     | Define the indicator(s), populations (including age, sex, and geographic entities), and time period(s) for which estimates were made.                                                                                                                                                                                                         | Main text, Table 1                                                                                                                                                                       |
| 2                                                                                                     | List the funding sources for the work.                                                                                                                                                                                                                                                                                                        | Main text, Conflict of Interest section, paragraph 1; Funding section, paragraph 1                                                                                                       |
| <b>Data inputs</b>                                                                                    |                                                                                                                                                                                                                                                                                                                                               |                                                                                                                                                                                          |
| <i>For all data inputs from multiple sources that are synthesised as part of the study:</i>           |                                                                                                                                                                                                                                                                                                                                               |                                                                                                                                                                                          |
| 3                                                                                                     | Describe how the data were identified and how the data were accessed.                                                                                                                                                                                                                                                                         | Main text, Geospatial estimation of vaccine coverage section, paragraphs 3-4; Spatial estimates of other health indicators section, paragraphs 1-2; Main text, Table 1                   |
| 4                                                                                                     | Specify the inclusion and exclusion criteria. Identify all ad hoc exclusions.                                                                                                                                                                                                                                                                 | Main text, Materials and Methods section, paragraph 2-3, 5; Supplemental tables S2 and S3                                                                                                |
| 5                                                                                                     | Provide information on all included data sources and their main characteristics. For each data source used, report reference information or contact name/institution, population represented, data collection method, year(s) of data collection, sex and age range, diagnostic criteria or measurement method, and sample size, as relevant. | Supplemental Table S2                                                                                                                                                                    |
| 6                                                                                                     | Identify and describe any categories of input data that have potentially important biases (e.g., based on characteristics listed in item 5).                                                                                                                                                                                                  | Main text, Discussion section, paragraph 4                                                                                                                                               |
| <i>For data inputs that contribute to the analysis but were not synthesised as part of the study:</i> |                                                                                                                                                                                                                                                                                                                                               |                                                                                                                                                                                          |
| 7                                                                                                     | Describe and give sources for any other data inputs.                                                                                                                                                                                                                                                                                          | N/A                                                                                                                                                                                      |
| <i>For all data inputs:</i>                                                                           |                                                                                                                                                                                                                                                                                                                                               |                                                                                                                                                                                          |
| 8                                                                                                     | Provide all data inputs in a file format from which data can be efficiently extracted (e.g., a spreadsheet rather than a PDF), including all relevant meta-data listed in item 5. For any data inputs that cannot be shared because of ethical or                                                                                             | Available through: <a href="https://ghdx.healthdata.org/record/ihme-data/dtp-vaccines-zero-dose-overlap">https://ghdx.healthdata.org/record/ihme-data/dtp-vaccines-zero-dose-overlap</a> |

|                               |                                                                                                                                                                                                                                                                         |                                                                                                                                                                                             |
|-------------------------------|-------------------------------------------------------------------------------------------------------------------------------------------------------------------------------------------------------------------------------------------------------------------------|---------------------------------------------------------------------------------------------------------------------------------------------------------------------------------------------|
|                               | legal reasons, such as third-party ownership, provide a contact name or the name of the institution that retains the right to the data.                                                                                                                                 |                                                                                                                                                                                             |
| <b>Data analysis</b>          |                                                                                                                                                                                                                                                                         |                                                                                                                                                                                             |
| 9                             | Provide a conceptual overview of the data analysis method. A diagram might be helpful.                                                                                                                                                                                  | Main text, Materials and methods section                                                                                                                                                    |
| 10                            | Provide a detailed description of all steps of the analysis, including mathematical formulae. This description should cover, as relevant, data cleaning, data pre-processing, data adjustments and weighting of data sources, and mathematical or statistical model(s). | Main text, Analyses of spatial overlap section                                                                                                                                              |
| 11                            | Describe how candidate models were evaluated and how the final model(s) were selected.                                                                                                                                                                                  | N/A                                                                                                                                                                                         |
| 12                            | Provide the results of an evaluation of model performance, if done, as well as the results of any relevant sensitivity analysis.                                                                                                                                        | N/A                                                                                                                                                                                         |
| 13                            | Describe methods for calculating uncertainty of the estimates. State which sources of uncertainty were, and were not, accounted for in the uncertainty analysis.                                                                                                        | Main text, Materials and methods section, paragraph 7; Discussion section, paragraph 4                                                                                                      |
| 14                            | State how analytic or statistical source used to generate estimates can be accessed.                                                                                                                                                                                    | Available through:<br><a href="https://www.github.com/ihmeuw/vaccines-zero-dose-overlap">https://www.github.com/ihmeuw/vaccines-zero-dose-overlap</a>                                       |
| <b>Results and discussion</b> |                                                                                                                                                                                                                                                                         |                                                                                                                                                                                             |
| 15                            | Provide published estimates in a file format from which data can be efficiently extracted.                                                                                                                                                                              | Available through:<br><a href="https://ghdx.healthdata.org/record/ihme-data/dtp-vaccines-zero-dose-overlap">https://ghdx.healthdata.org/record/ihme-data/dtp-vaccines-zero-dose-overlap</a> |
| 16                            | Report a quantitative measure of uncertainty of the estimates (e.g., uncertainty intervals).                                                                                                                                                                            | Main text, Materials and methods section, paragraph 7; Discussion section, paragraph 4                                                                                                      |
| 17                            | Interpret results in light of existing evidence. If updating a previous set of estimates, describe the reasons for changes in estimates.                                                                                                                                | Main text, Discussion section, paragraphs 3-5                                                                                                                                               |
| 18                            | Discuss limitations that affect interpretation of the estimates.                                                                                                                                                                                                        | Main text, Discussion section, paragraph 4                                                                                                                                                  |

*Supplemental Table S5: Geospatial covariates used in modeling.*

| <b>Covariate</b>                                           | <b>Temporal resolution</b> | <b>Source</b>                   | <b>Reference</b>                                                                                                                                                                                                                                                                                                                                                                                                                                                                                                                                                                                                                    |
|------------------------------------------------------------|----------------------------|---------------------------------|-------------------------------------------------------------------------------------------------------------------------------------------------------------------------------------------------------------------------------------------------------------------------------------------------------------------------------------------------------------------------------------------------------------------------------------------------------------------------------------------------------------------------------------------------------------------------------------------------------------------------------------|
| <b>Travel time to nearest settlement</b>                   | Static                     | Oxford                          | Weiss, D. J., et al. A global map of travel time to cities to assess inequalities in accessibility in 2015. <i>Nature</i> 533, 333-336 (2018).                                                                                                                                                                                                                                                                                                                                                                                                                                                                                      |
| <b>Distance from rivers or lakes</b>                       | Static                     | Natural Earth Data (derived)    | Available at: <a href="http://www.naturalearthdata.com/downloads/10m-physical-vectors/10m-rivers-lake-centerlines/">http://www.naturalearthdata.com/downloads/10m-physical-vectors/10m-rivers-lake-centerlines/</a> AND <a href="http://www.worldwildlife.org/pages/global-lakes-and-wetlands-database">http://www.worldwildlife.org/pages/global-lakes-and-wetlands-database</a>                                                                                                                                                                                                                                                   |
| <b>Elevation</b>                                           | Static                     | NOAA GLOBE                      | Available at: <a href="https://www.ngdc.noaa.gov/mgg/topo/gltiles.html">https://www.ngdc.noaa.gov/mgg/topo/gltiles.html</a>                                                                                                                                                                                                                                                                                                                                                                                                                                                                                                         |
| <b>Population</b>                                          | Annual                     | WorldPop                        | Lloyd, C. T., et al. Global spatio-temporally harmonised datasets for producing high-resolution gridded population distribution datasets. <i>Big Earth Data</i> . 2096(4471): 2574-5417 (2019).<br>World Pop. Get data. Available at: <a href="http://www.worldpop.org.uk/data/get_data/">http://www.worldpop.org.uk/data/get_data/</a> . (Accessed: 22th January 2019)                                                                                                                                                                                                                                                             |
| <b>Urban or rural</b>                                      | Annual                     | European Commission / GHS       | Pesaresi, M. et al. Operating procedure for the production of the Global Human Settlement Layer from Landsat data of the epochs 1975, 1990, 2000, and 2014. (Publications Office of the European Union, 2016). Available at: <a href="http://ghsl.jrc.ec.europa.eu/data.php">http://ghsl.jrc.ec.europa.eu/data.php</a>                                                                                                                                                                                                                                                                                                              |
| <b>Irrigation</b>                                          | Static                     | University of Frankfurt and FAO | Siebert, S., Doll, P., Hoogeveen, J., Faures, J.-M., Frenken, K., & Feick, S. Development and validation of the global map of irrigation areas. <i>Hydrology and Earth System Sciences</i> 9, 535-547 (2005).<br>Goethe-Universität. Generation of a digital global map of irrigation areas. Available at: <a href="https://www.unifrankfurt.de/45218039/Global_Irrigation_Map">https://www.unifrankfurt.de/45218039/Global_Irrigation_Map</a> . (Accessed: 25th July 2017). Also from: <a href="http://www.fao.org/nr/water/aquastat/irrigationmap/index10.stm">http://www.fao.org/nr/water/aquastat/irrigationmap/index10.stm</a> |
| <b>Cloud cover percentage</b>                              | Annual                     | Climatic Research Unit          | Harris, I., Osborn, T.J., Jones, P. et al. Version 4 of the CRU TS monthly high-resolution gridded multivariate climate dataset. <i>Sci Data</i> 7, 109 (2020). <a href="https://doi.org/10.1038/s41597-020-0453-3">https://doi.org/10.1038/s41597-020-0453-3</a><br>High-resolution gridded datasets (and derived products). Available at: <a href="https://crudata.uea.ac.uk/cru/data/hrg/">https://crudata.uea.ac.uk/cru/data/hrg/</a> .                                                                                                                                                                                         |
| <b>Mean diurnal temperature range</b>                      | Annual                     | Climatic Research Unit          | Harris, I., Osborn, T.J., Jones, P. et al. Version 4 of the CRU TS monthly high-resolution gridded multivariate climate dataset. <i>Sci Data</i> 7, 109 (2020). <a href="https://doi.org/10.1038/s41597-020-0453-3">https://doi.org/10.1038/s41597-020-0453-3</a><br>High-resolution gridded datasets (and derived products). Available at: <a href="https://crudata.uea.ac.uk/cru/data/hrg/">https://crudata.uea.ac.uk/cru/data/hrg/</a> .                                                                                                                                                                                         |
| <b>Frost day frequency</b>                                 | Annual                     | Climatic Research Unit          | Harris, I., Osborn, T.J., Jones, P. et al. Version 4 of the CRU TS monthly high-resolution gridded multivariate climate dataset. <i>Sci Data</i> 7, 109 (2020). <a href="https://doi.org/10.1038/s41597-020-0453-3">https://doi.org/10.1038/s41597-020-0453-3</a><br>High-resolution gridded datasets (and derived products). Available at: <a href="https://crudata.uea.ac.uk/cru/data/hrg/">https://crudata.uea.ac.uk/cru/data/hrg/</a> .                                                                                                                                                                                         |
| <b>Mean potential evapotranspiration per day per month</b> | Annual                     | Climatic Research Unit          | Harris, I., Osborn, T.J., Jones, P. et al. Version 4 of the CRU TS monthly high-resolution gridded multivariate climate dataset. <i>Sci Data</i> 7, 109 (2020). <a href="https://doi.org/10.1038/s41597-020-0453-3">https://doi.org/10.1038/s41597-020-0453-3</a>                                                                                                                                                                                                                                                                                                                                                                   |

| Covariate                              | Temporal resolution | Source                                                | Reference                                                                                                                                                                                                                                                                                                                                                                                                                                                                                                                                                                        |
|----------------------------------------|---------------------|-------------------------------------------------------|----------------------------------------------------------------------------------------------------------------------------------------------------------------------------------------------------------------------------------------------------------------------------------------------------------------------------------------------------------------------------------------------------------------------------------------------------------------------------------------------------------------------------------------------------------------------------------|
|                                        |                     |                                                       | High-resolution gridded datasets (and derived products). Available at: <a href="https://crudata.uea.ac.uk/cru/data/hrg/">https://crudata.uea.ac.uk/cru/data/hrg/</a> .                                                                                                                                                                                                                                                                                                                                                                                                           |
| Average daily minimum temperature      | Annual              | Climatic Research Unit                                | Harris, I., Osborn, T.J., Jones, P. et al. Version 4 of the CRU TS monthly high-resolution gridded multivariate climate dataset. Sci Data 7, 109 (2020). <a href="https://doi.org/10.1038/s41597-020-0453-3">https://doi.org/10.1038/s41597-020-0453-3</a><br>High-resolution gridded datasets (and derived products). Available at: <a href="https://crudata.uea.ac.uk/cru/data/hrg/">https://crudata.uea.ac.uk/cru/data/hrg/</a> .                                                                                                                                             |
| Average daily mean temperature         | Annual              | Climatic Research Unit                                | Harris, I., Osborn, T.J., Jones, P. et al. Version 4 of the CRU TS monthly high-resolution gridded multivariate climate dataset. Sci Data 7, 109 (2020). <a href="https://doi.org/10.1038/s41597-020-0453-3">https://doi.org/10.1038/s41597-020-0453-3</a><br>High-resolution gridded datasets (and derived products). Available at: <a href="https://crudata.uea.ac.uk/cru/data/hrg/">https://crudata.uea.ac.uk/cru/data/hrg/</a> .                                                                                                                                             |
| Average daily maximum temperature      | Annual              | Climatic Research Unit                                | Harris, I., Osborn, T.J., Jones, P. et al. Version 4 of the CRU TS monthly high-resolution gridded multivariate climate dataset. Sci Data 7, 109 (2020). <a href="https://doi.org/10.1038/s41597-020-0453-3">https://doi.org/10.1038/s41597-020-0453-3</a><br>High-resolution gridded datasets (and derived products). Available at: <a href="https://crudata.uea.ac.uk/cru/data/hrg/">https://crudata.uea.ac.uk/cru/data/hrg/</a> .                                                                                                                                             |
| Mean vapour pressure                   | Annual              | Climatic Research Unit                                | Harris, I., Osborn, T.J., Jones, P. et al. Version 4 of the CRU TS monthly high-resolution gridded multivariate climate dataset. Sci Data 7, 109 (2020). <a href="https://doi.org/10.1038/s41597-020-0453-3">https://doi.org/10.1038/s41597-020-0453-3</a><br>High-resolution gridded datasets (and derived products). Available at: <a href="https://crudata.uea.ac.uk/cru/data/hrg/">https://crudata.uea.ac.uk/cru/data/hrg/</a> .                                                                                                                                             |
| Monthly wet day frequency              | Annual              | Climatic Research Unit                                | Harris, I., Osborn, T.J., Jones, P. et al. Version 4 of the CRU TS monthly high-resolution gridded multivariate climate dataset. Sci Data 7, 109 (2020). <a href="https://doi.org/10.1038/s41597-020-0453-3">https://doi.org/10.1038/s41597-020-0453-3</a><br>High-resolution gridded datasets (and derived products). Available at: <a href="https://crudata.uea.ac.uk/cru/data/hrg/">https://crudata.uea.ac.uk/cru/data/hrg/</a> .                                                                                                                                             |
| Enhanced vegetation index              | Annual              | Moderate Resolution Imaging Spectroradiometer (MODIS) | Weiss, D. J. et al. An effective approach for gapfilling continental scale remotely sensed timeseries. Isprs J. Photogramm. Remote Sens. 98, 106–118 (2014).<br>USGS & NASA. Vegetation indices 16-Day L3 global 500m MOD13A1 dataset. Available at: <a href="https://lpdaac.usgs.gov/dataset_discovery/modis/modis_products_table/mcd43b4">https://lpdaac.usgs.gov/dataset_discovery/modis/modis_products_table/mcd43b4</a> . (Accessed: 25th July 2017) Huete, A., Justice, C. & van Leeuwen, W. MODIS vegetation index (MOD 13) algorithm theoretical basis document. (1999). |
| Growing season length                  | Static              | FAO Global Agro-Ecological Zone (GAEZ) project        | Available at: <a href="http://www.fao.org/nr/gaez/about-data-portal/en/">http://www.fao.org/nr/gaez/about-data-portal/en/</a>                                                                                                                                                                                                                                                                                                                                                                                                                                                    |
| Normalised difference vegetation index | Annual              | MODIS                                                 | NASA & NOAA. Advanced Very High Resolution Radiometer (AVHRR) Normalized Difference Vegetation Index (NDVI) dataset. Available at: <a href="https://nex.nasa.gov/nex/projects/1349/">https://nex.nasa.gov/nex/projects/1349/</a> . (Accessed: 25th July 2017)                                                                                                                                                                                                                                                                                                                    |

| Covariate                                                                        | Temporal resolution | Source               | Reference                                                                                                                                                                                                                                                                                                                                                                                              |
|----------------------------------------------------------------------------------|---------------------|----------------------|--------------------------------------------------------------------------------------------------------------------------------------------------------------------------------------------------------------------------------------------------------------------------------------------------------------------------------------------------------------------------------------------------------|
|                                                                                  |                     |                      |                                                                                                                                                                                                                                                                                                                                                                                                        |
| <b>Multi-source Weighted-Ensemble Precipitation</b>                              | Annual              | Princeton University | Beck, H.E., A.I.J.M. van Dijk, V. Levizzani, J. Schellekens, D.G. Miralles, B. Martens, A. de Roo: MSWEP: 3-hourly 0.25 global gridded precipitation (1979-2015) by merging gauge, satellite, and reanalysis data, Hydrology and Earth System Sciences, 21(1), 589-615, 2017.<br><br>Available at: <a href="https://data.princetonclimate.com/opendap">https://data.princetonclimate.com/opendap</a> . |
| <b>Tasseled cap brightness</b>                                                   | Annual              | MODIS                | Lobser, S.E., Cohen, W.B. MODIS tasseled cap: land cover characteristics expressed through transformed MODIS data. International Journal of Remote Sensing. 28(22): 5079-5101 (2007).<br><br>Available at: <a href="https://modis.gsfc.nasa.gov/data/dataproduct/mod43.php">https://modis.gsfc.nasa.gov/data/dataproduct/mod43.php</a>                                                                 |
| <b>Tasseled cap wetness</b>                                                      | Annual              | MODIS                | Lobser, S.E., Cohen, W.B. MODIS tasseled cap: land cover characteristics expressed through transformed MODIS data. International Journal of Remote Sensing. 28(22): 5079-5101 (2007).<br><br>Available at: <a href="https://modis.gsfc.nasa.gov/data/dataproduct/mod43.php">https://modis.gsfc.nasa.gov/data/dataproduct/mod43.php</a> .                                                               |
| <b>Average land surface temperature</b>                                          | Annual              | MODIS                | Weiss, D. J. et al. An effective approach for gapfilling continental scale remotely sensed timeseries. Isprs J. Photogramm. Remote Sens. 98, 106–118 (2014).<br><br>Available at <a href="https://modis.gsfc.nasa.gov/data/dataproduct/mod11.php">https://modis.gsfc.nasa.gov/data/dataproduct/mod11.php</a>                                                                                           |
| <b>Daytime land surface temperature</b>                                          | Annual              | MODIS                | Weiss, D. J. et al. An effective approach for gapfilling continental scale remotely sensed timeseries. Isprs J. Photogramm. Remote Sens. 98, 106–118 (2014).<br><br>Available at <a href="https://modis.gsfc.nasa.gov/data/dataproduct/mod11.php">https://modis.gsfc.nasa.gov/data/dataproduct/mod11.php</a>                                                                                           |
| <b>Difference between daytime and nighttime land surface temperature</b>         | Annual              | MODIS                | Weiss, D. J. et al. An effective approach for gapfilling continental scale remotely sensed timeseries. Isprs J. Photogramm. Remote Sens. 98, 106–118 (2014).<br><br>Available at <a href="https://modis.gsfc.nasa.gov/data/dataproduct/mod11.php">https://modis.gsfc.nasa.gov/data/dataproduct/mod11.php</a>                                                                                           |
| <b>Nighttime land surface temperature</b>                                        | Annual              | MODIS                | Weiss, D. J. et al. An effective approach for gapfilling continental scale remotely sensed timeseries. Isprs J. Photogramm. Remote Sens. 98, 106–118 (2014).<br><br>Available at <a href="https://modis.gsfc.nasa.gov/data/dataproduct/mod11.php">https://modis.gsfc.nasa.gov/data/dataproduct/mod11.php</a>                                                                                           |
| <b>Mean years of education among 15–49 year-old females (maternal education)</b> | Annual              | IHME                 | Graetz, N., Woyczynski, L., Wilson, K.F. et al. Mapping disparities in education across low- and middle-income countries. Nature 577, 235–238 (2020).<br><br>Available at: <a href="http://internal-ghdx.healthdata.org/record/ihme-data/lmic-education-geospatial-estimates-2000-2017">http://internal-ghdx.healthdata.org/record/ihme-data/lmic-education-geospatial-estimates-2000-2017</a>         |

## Supplemental Figures

### *Supplemental Figures S1–S23: Country-specific AUC step plots.*

For each country (Angola, DRC, Ethiopia, Indonesia and Nigeria) and health indicator (children with stunting, U5M, missed ORT, missed ITNs and LF), these scatterplots visualize area under the curve (AUC) can be used to quantify the proportion of the target population for the given indicator (Y axis) that could be reached through cumulative proportion targeting of districts for children with no-DTP (X axis). Individual points represent districts, ordered to begin with the district with the highest number of no-DTP children, then the second highest, until the cumulative proportion of no-DTP children reaches 100%. The red line represents  $AUC=0.5$ , indicating equal proportions for the given health indicator reached through cumulative no-DTP targeting. Curves below the red line are associated with  $AUC<0.5$  or smaller proportions for the given indicator reached, and curves above the red line are associated with  $AUC>0.5$ , or greater proportions for the given indicator reached. Point size represents district population size of children under 1.

### Supplemental Figure S1: Nigeria, U5M

Nigeria: cumulative proportions reached with no-DTP targeting

AUC = 0.448

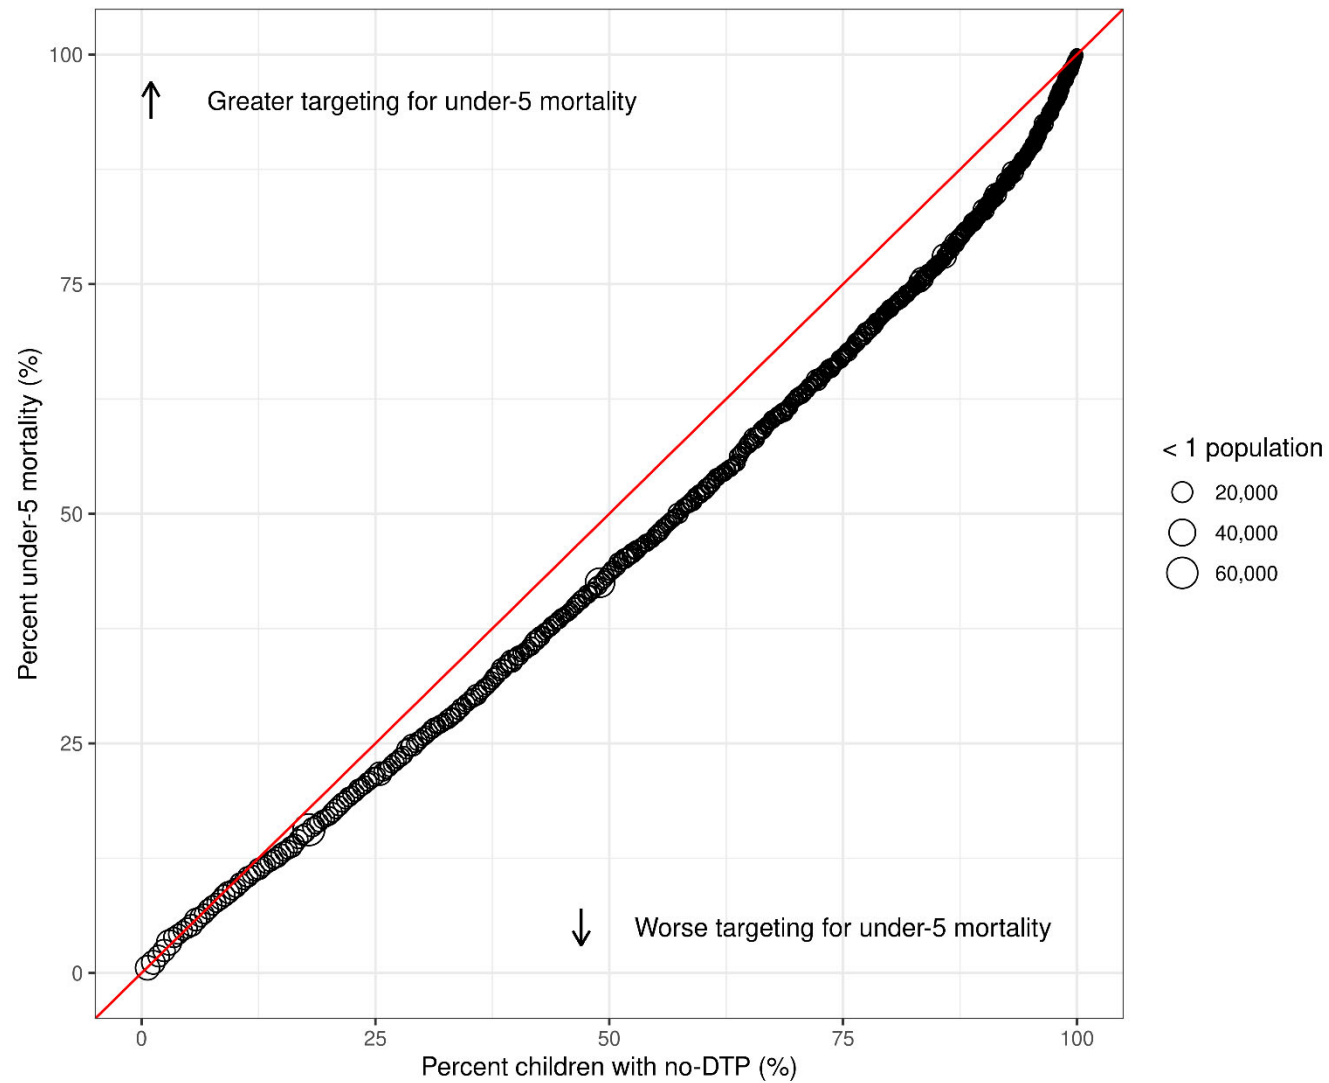

### Supplemental Figure S2: Nigeria, missed ITNs

Nigeria: cumulative proportions reached with no-DTP targeting

AUC = 0.262

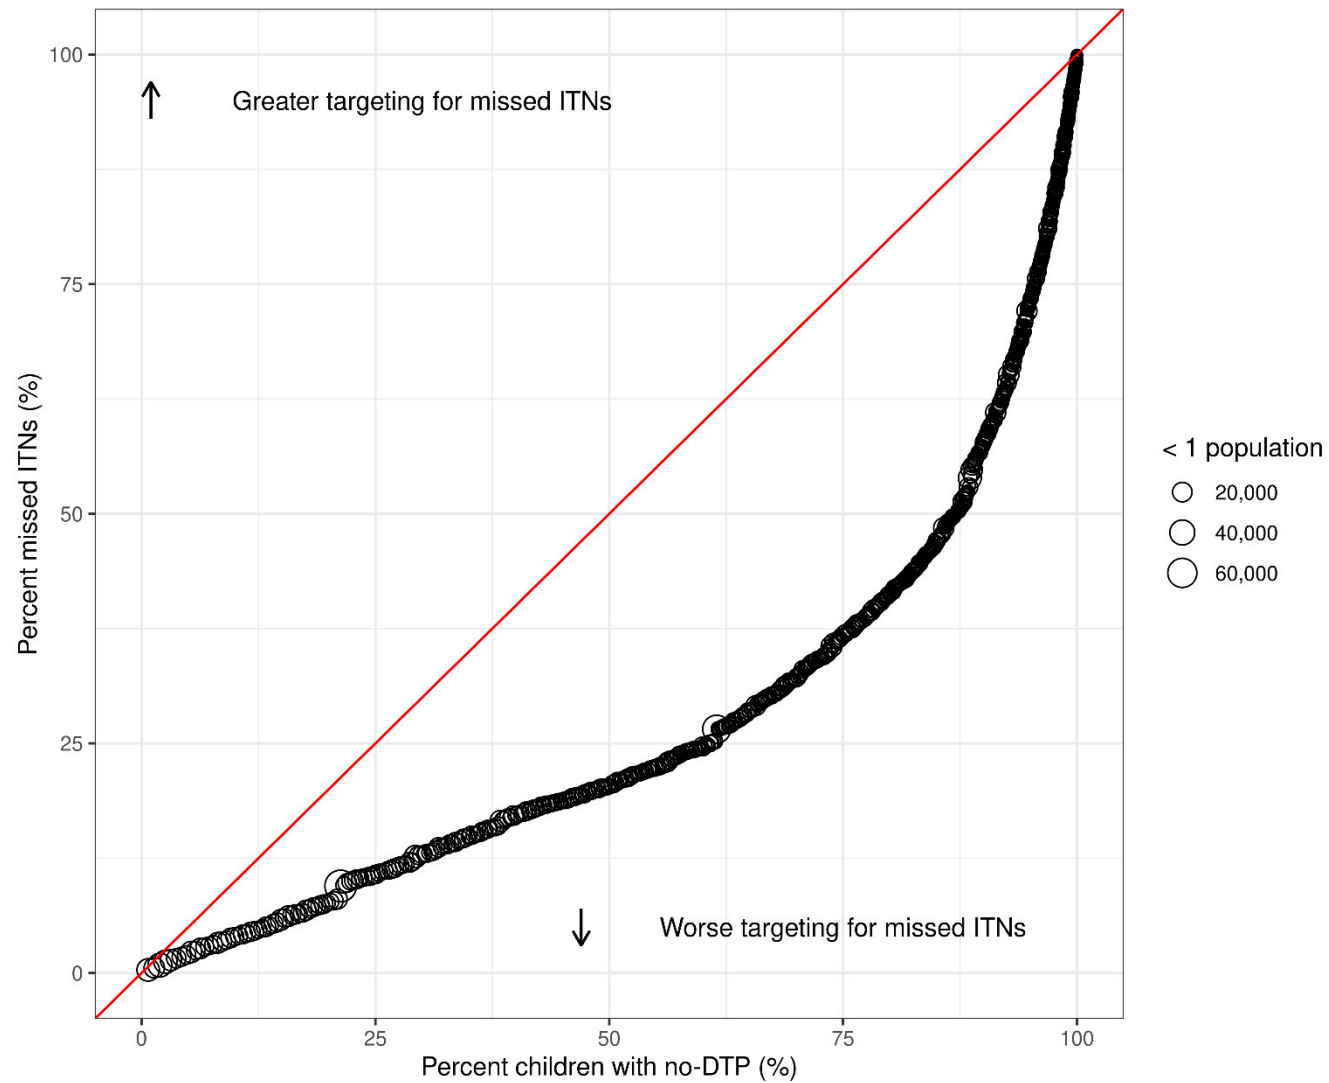

### Supplemental Figure S3: Nigeria, missed ORT

Nigeria: cumulative proportions reached with no-DTP targeting

AUC = 0.485

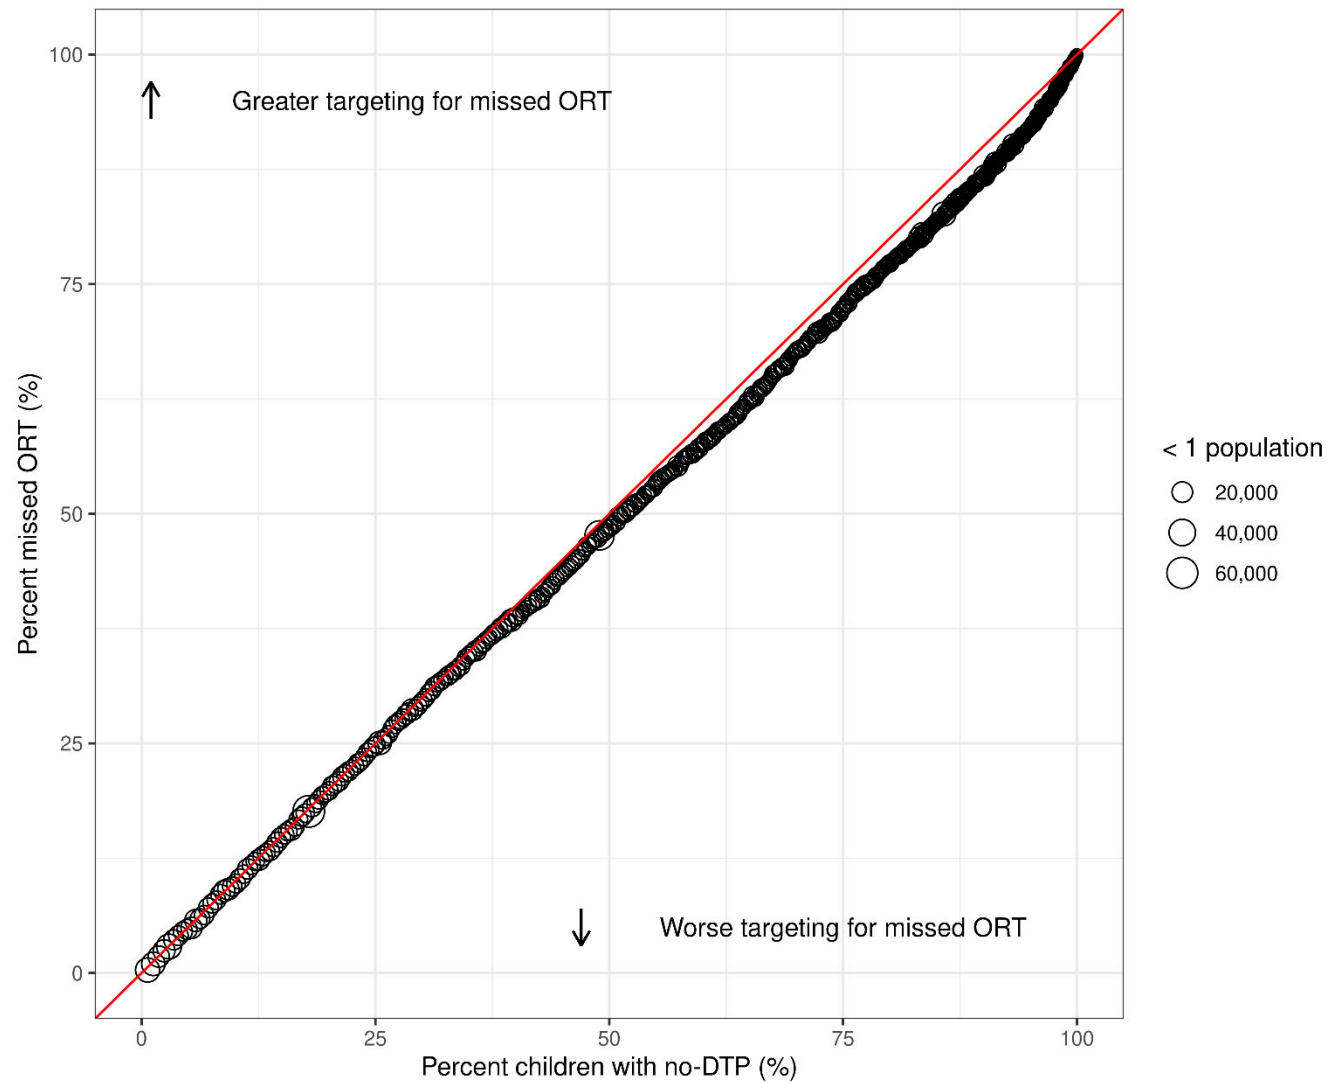

#### Supplemental Figure S4: Nigeria, LF

Nigeria: cumulative proportions reached with no-DTP targeting

AUC = 0.217

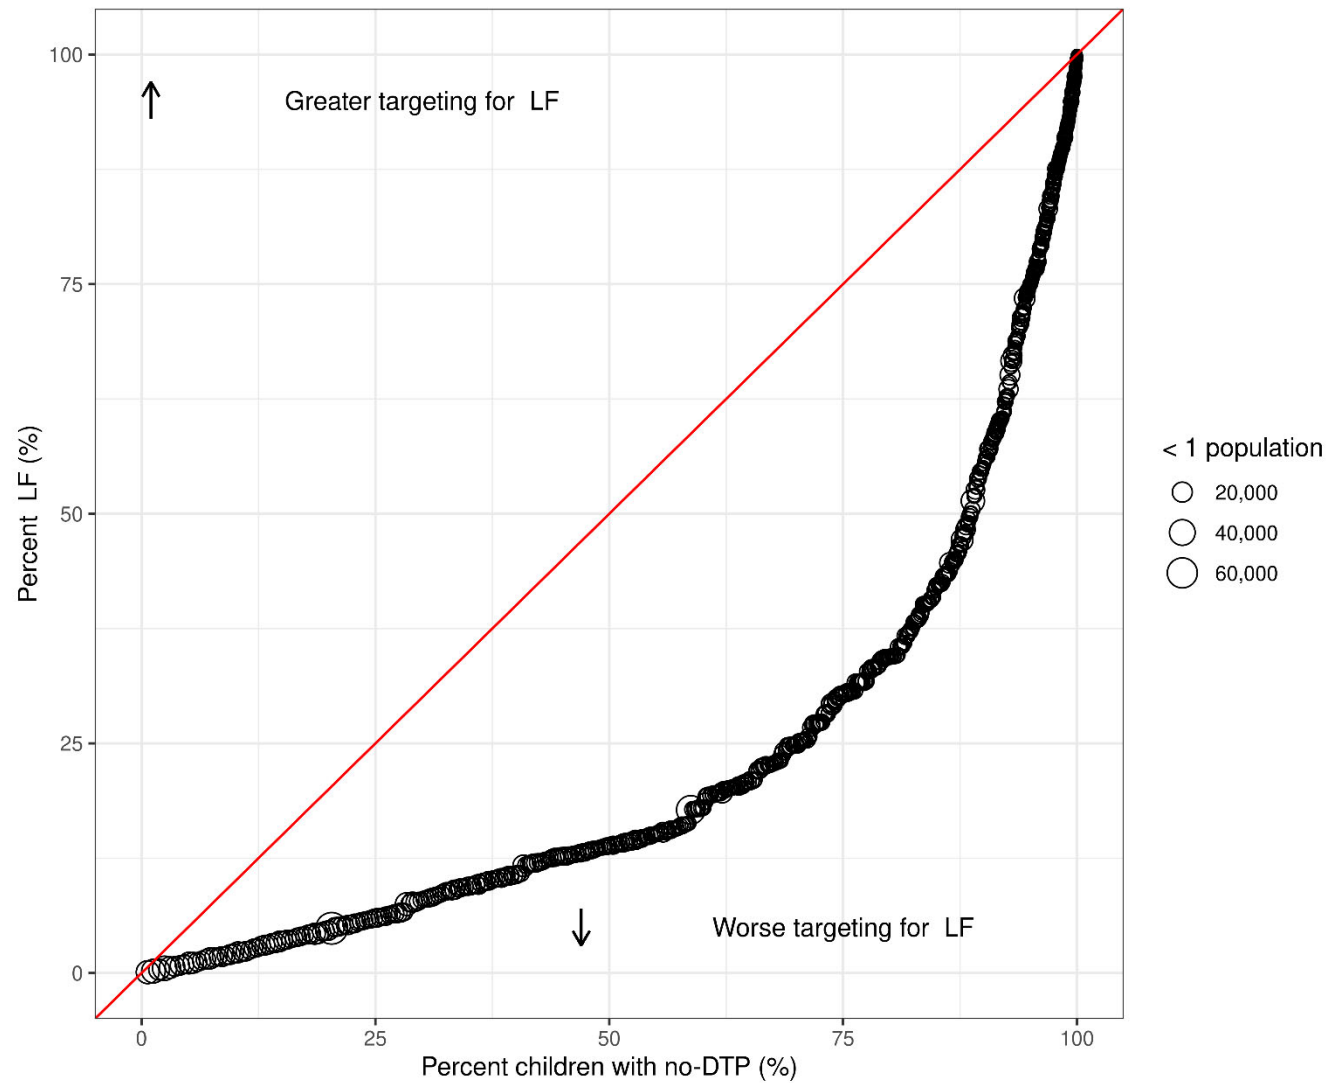

### Supplemental Figure S5: Angola, stunting

Angola: cumulative proportions reached with no-DTP targeting

AUC = 0.523

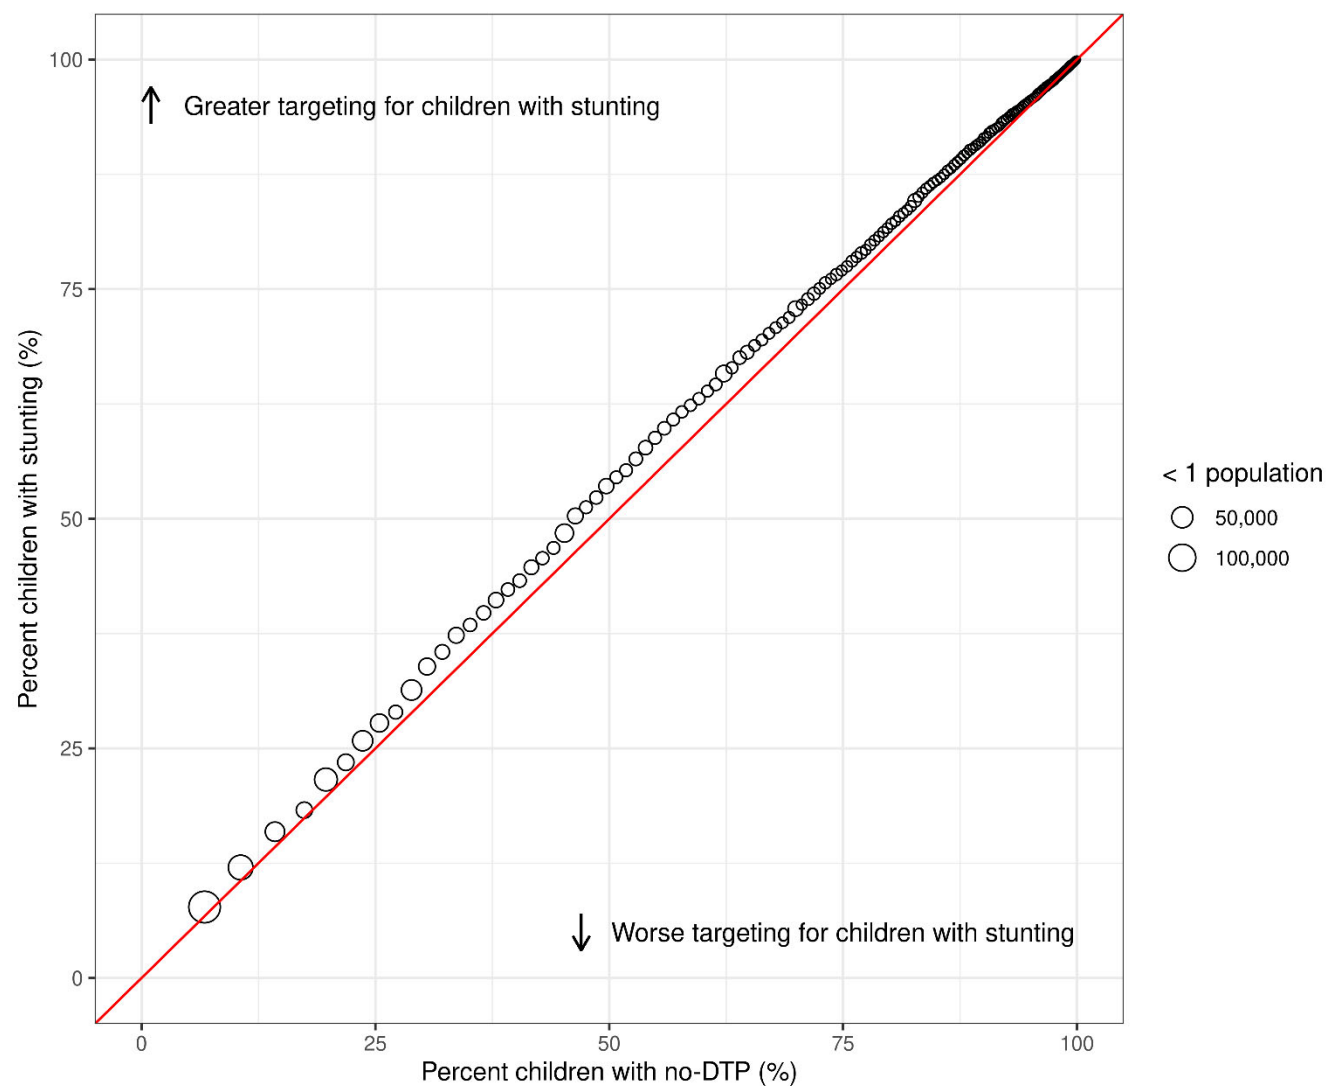

### Supplemental Figure S6: Angola, U5M

Angola: cumulative proportions reached with no-DTP targeting

AUC = 0.453

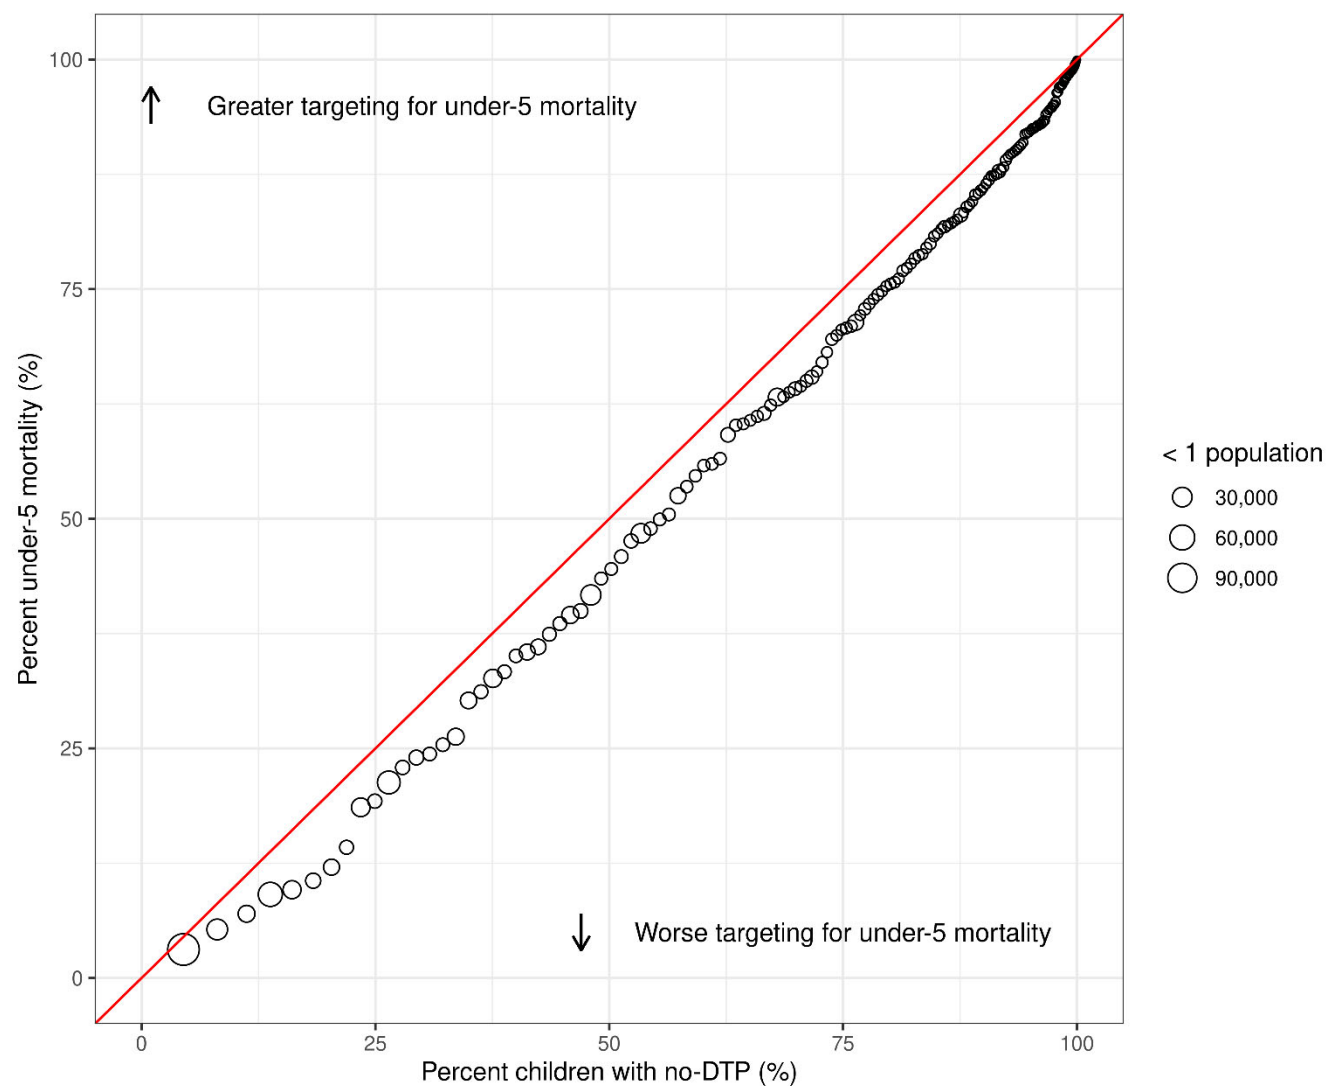

### Supplemental Figure S7: Angola, missed ITNs

Angola: cumulative proportions reached with no-DTP targeting

AUC = 0.58

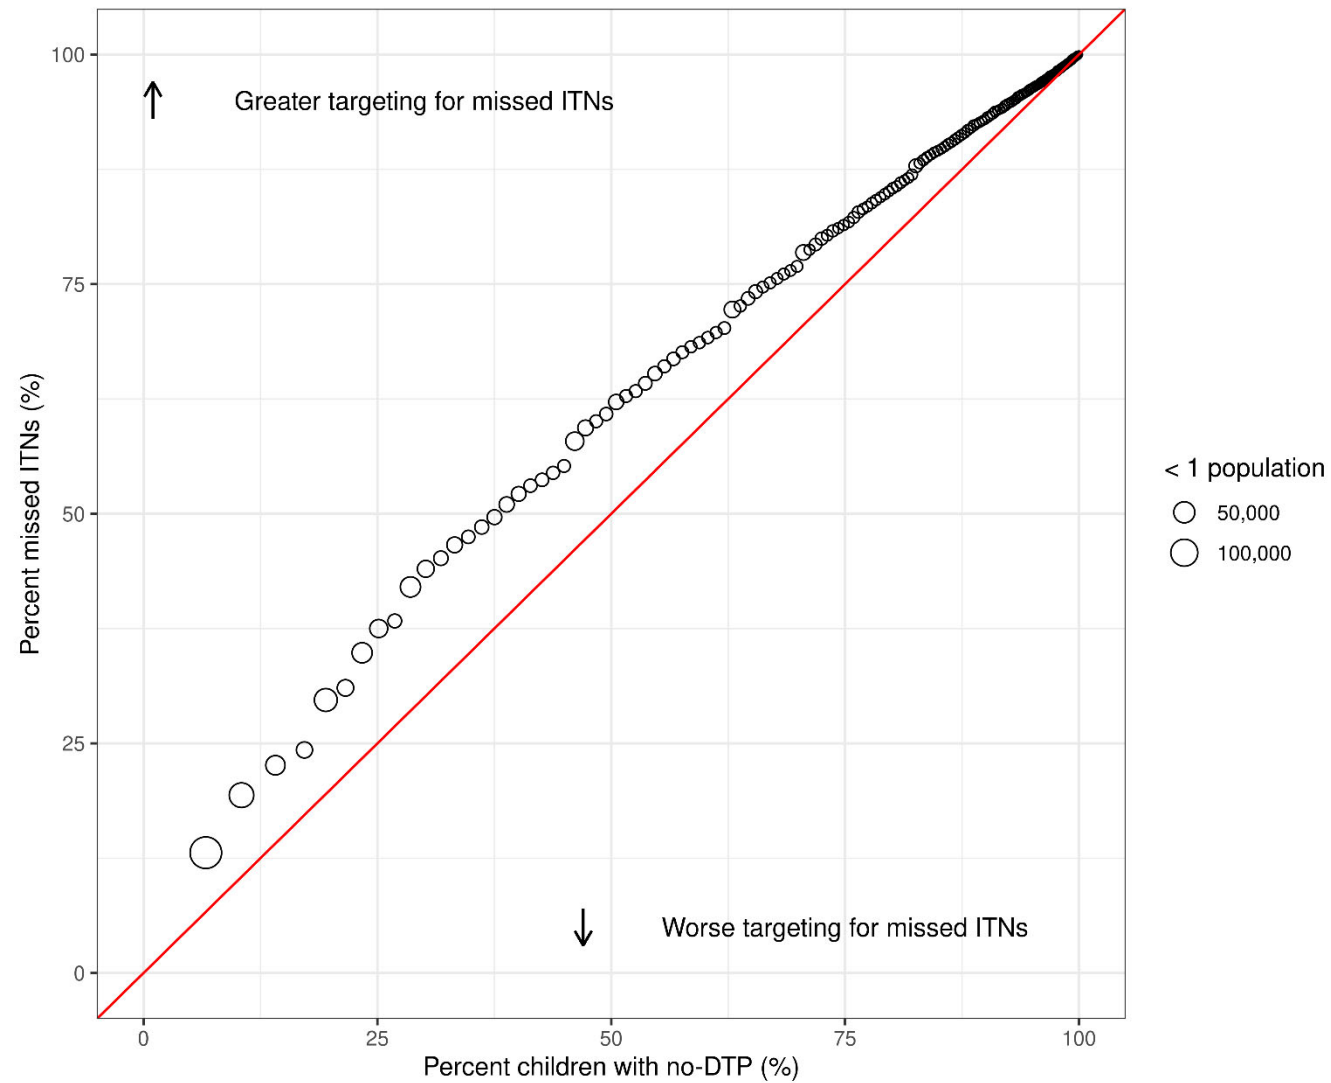

### Supplemental Figure S8: Angola, missed ORT

Angola: cumulative proportions reached with no-DTP targeting

AUC = 0.448

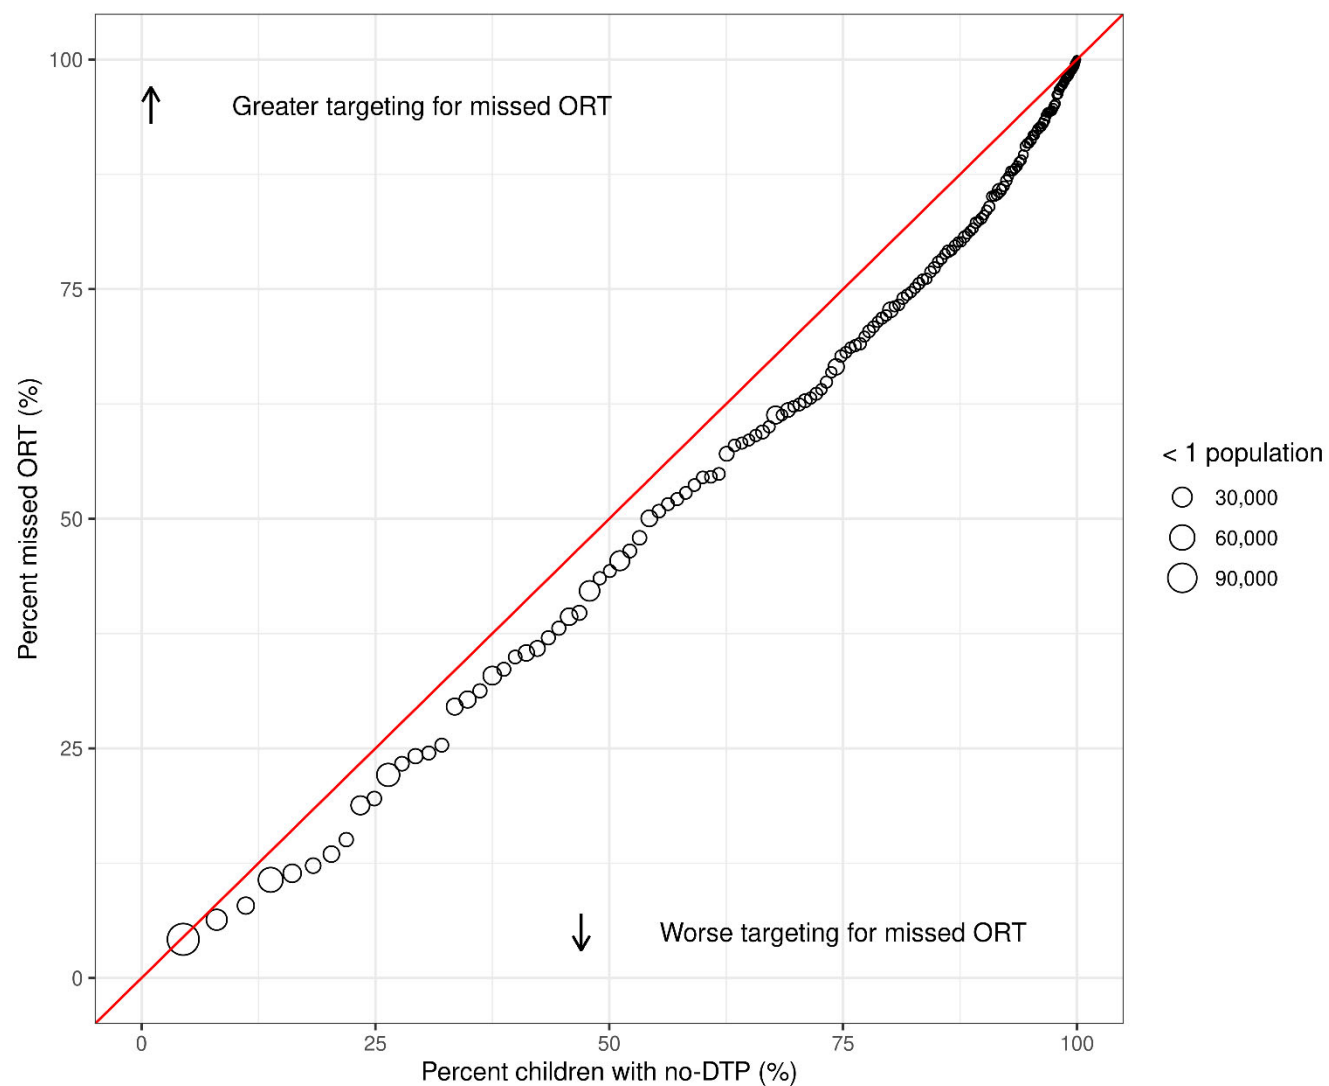

### Supplemental Figure S9: Angola, LF

Angola: cumulative proportions reached with no-DTP targeting

AUC = 0.546

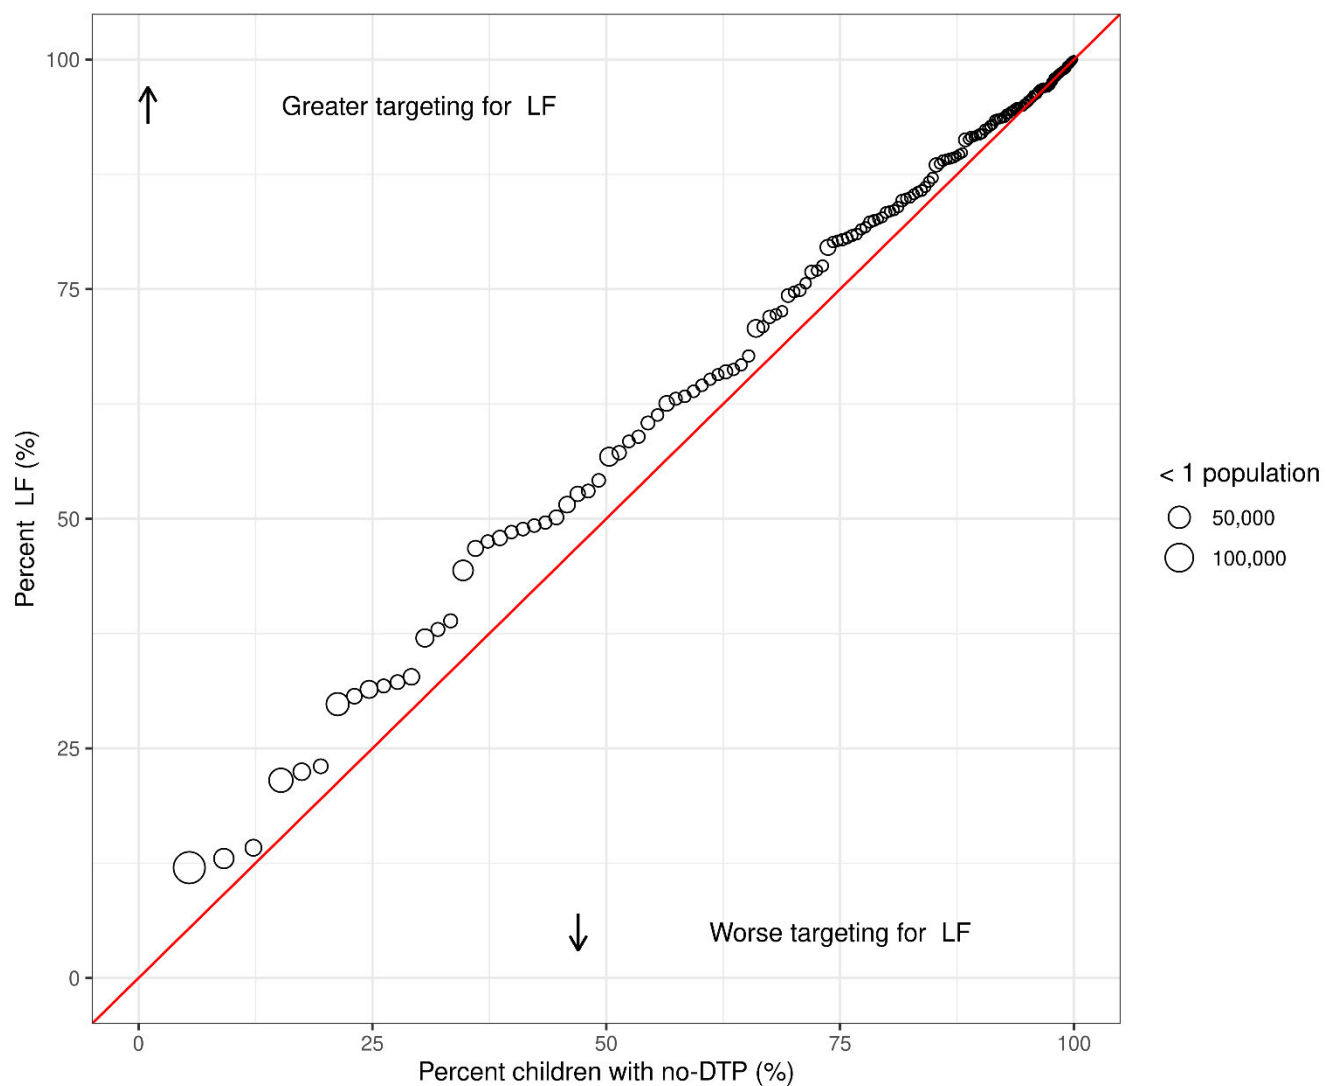

### Supplemental Figure S10: DRC, stunting

D.R.C.: cumulative proportions reached with no-DTP targeting

AUC = 0.432

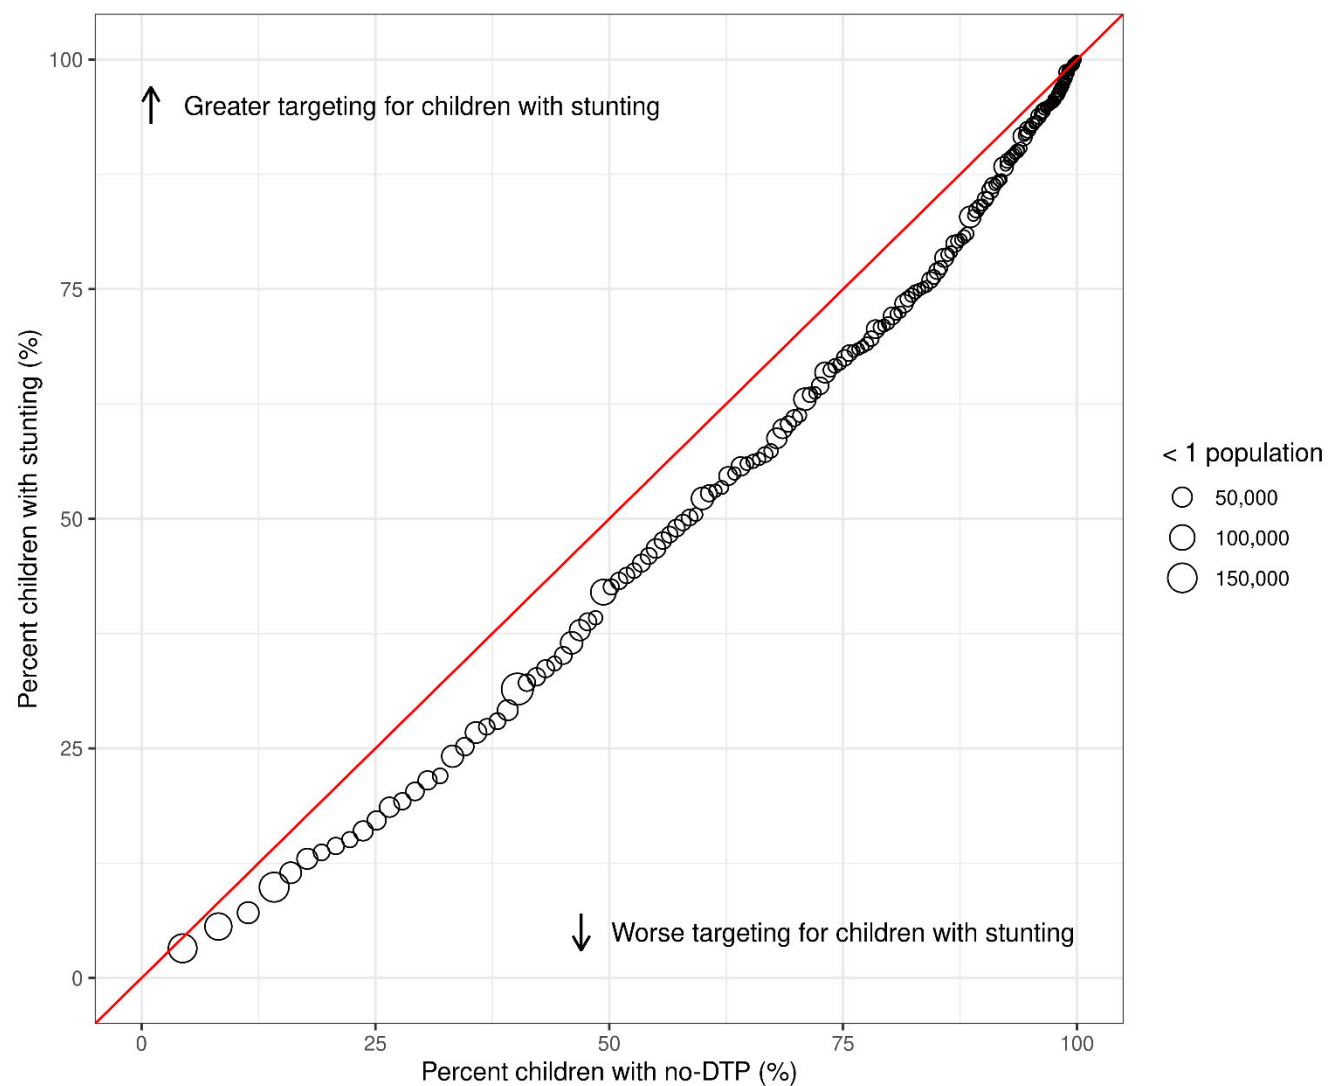

### Supplemental Figure S11: DRC, U5M

D.R.C.: cumulative proportions reached with no-DTP targeting

AUC = 0.392

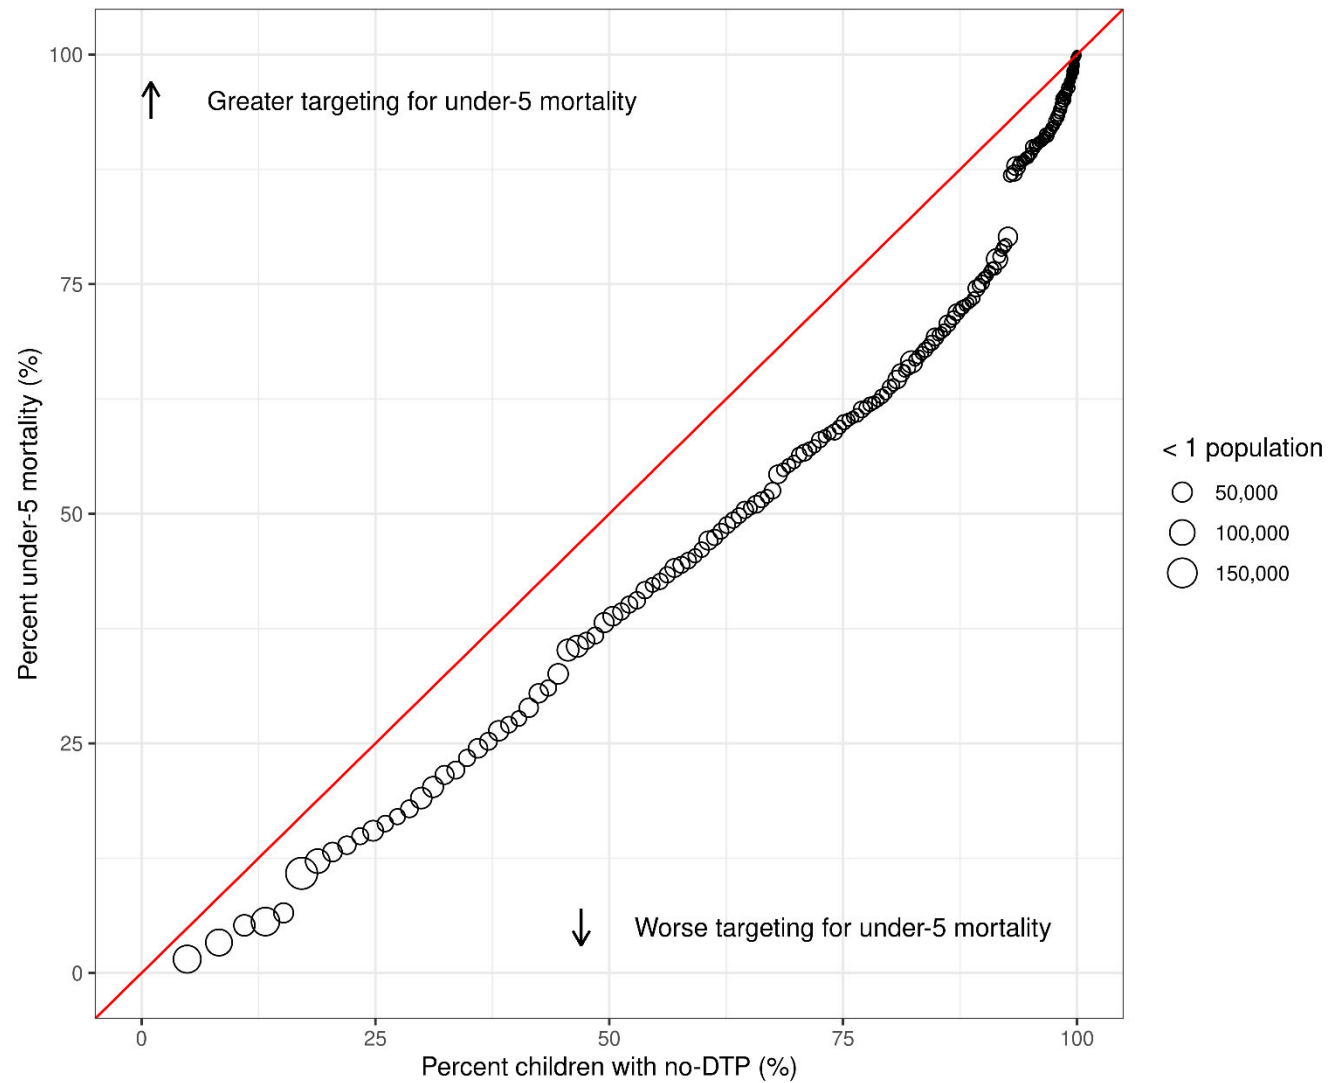

### Supplemental Figure S12: DRC, missed ITNs

D.R.C.: cumulative proportions reached with no-DTP targeting

AUC = 0.428

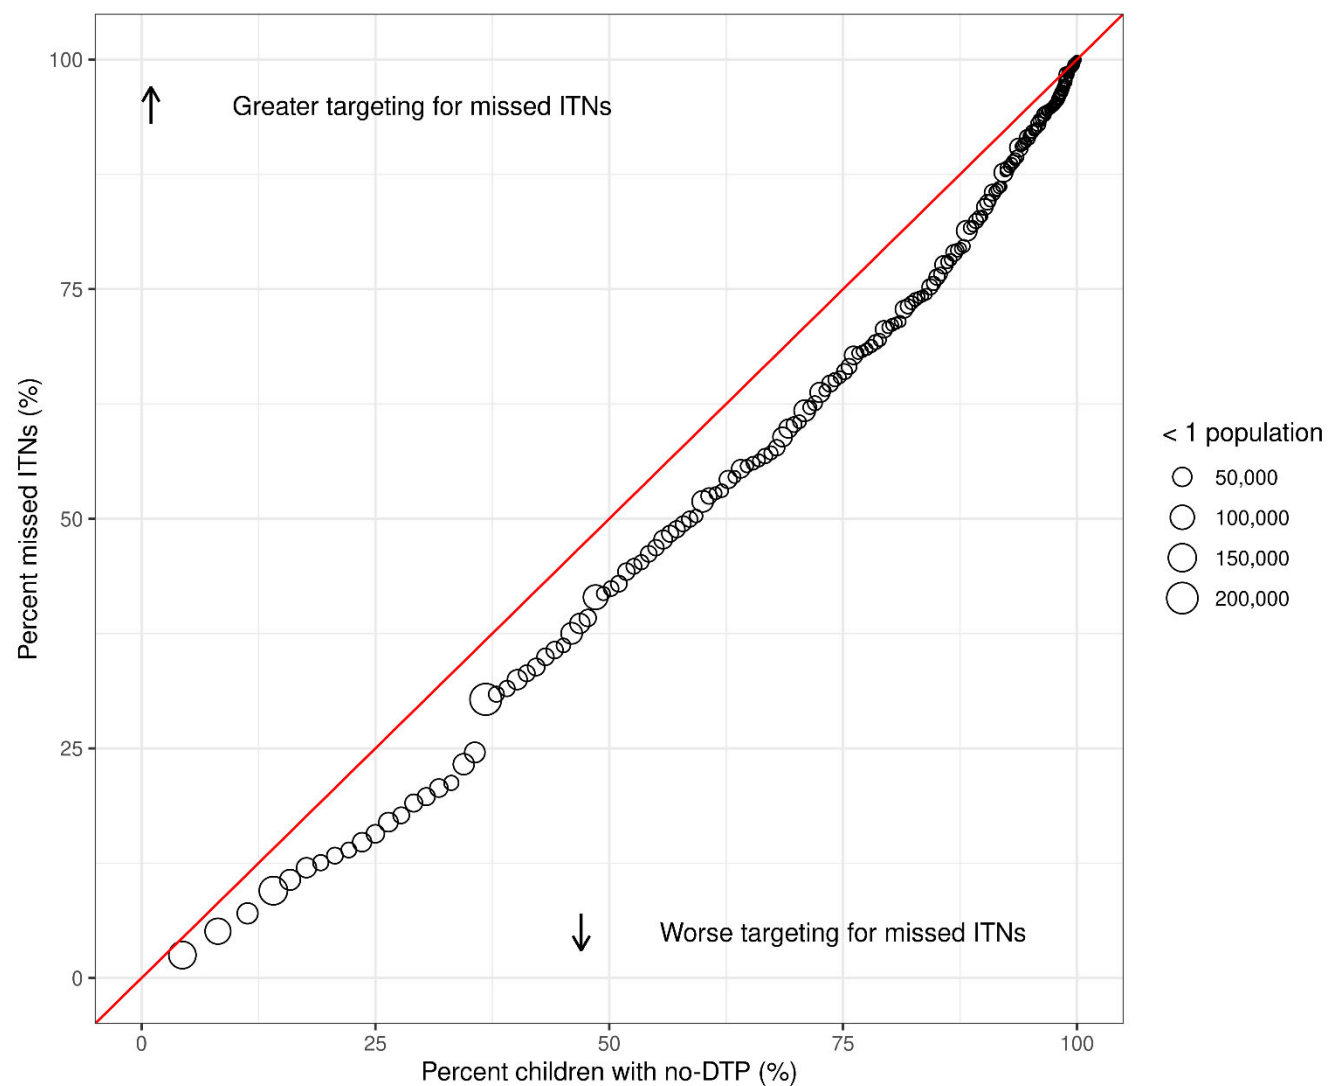

### Supplemental Figure S13: DRC, missed ORT

D.R.C.: cumulative proportions reached with no-DTP targeting

AUC = 0.4

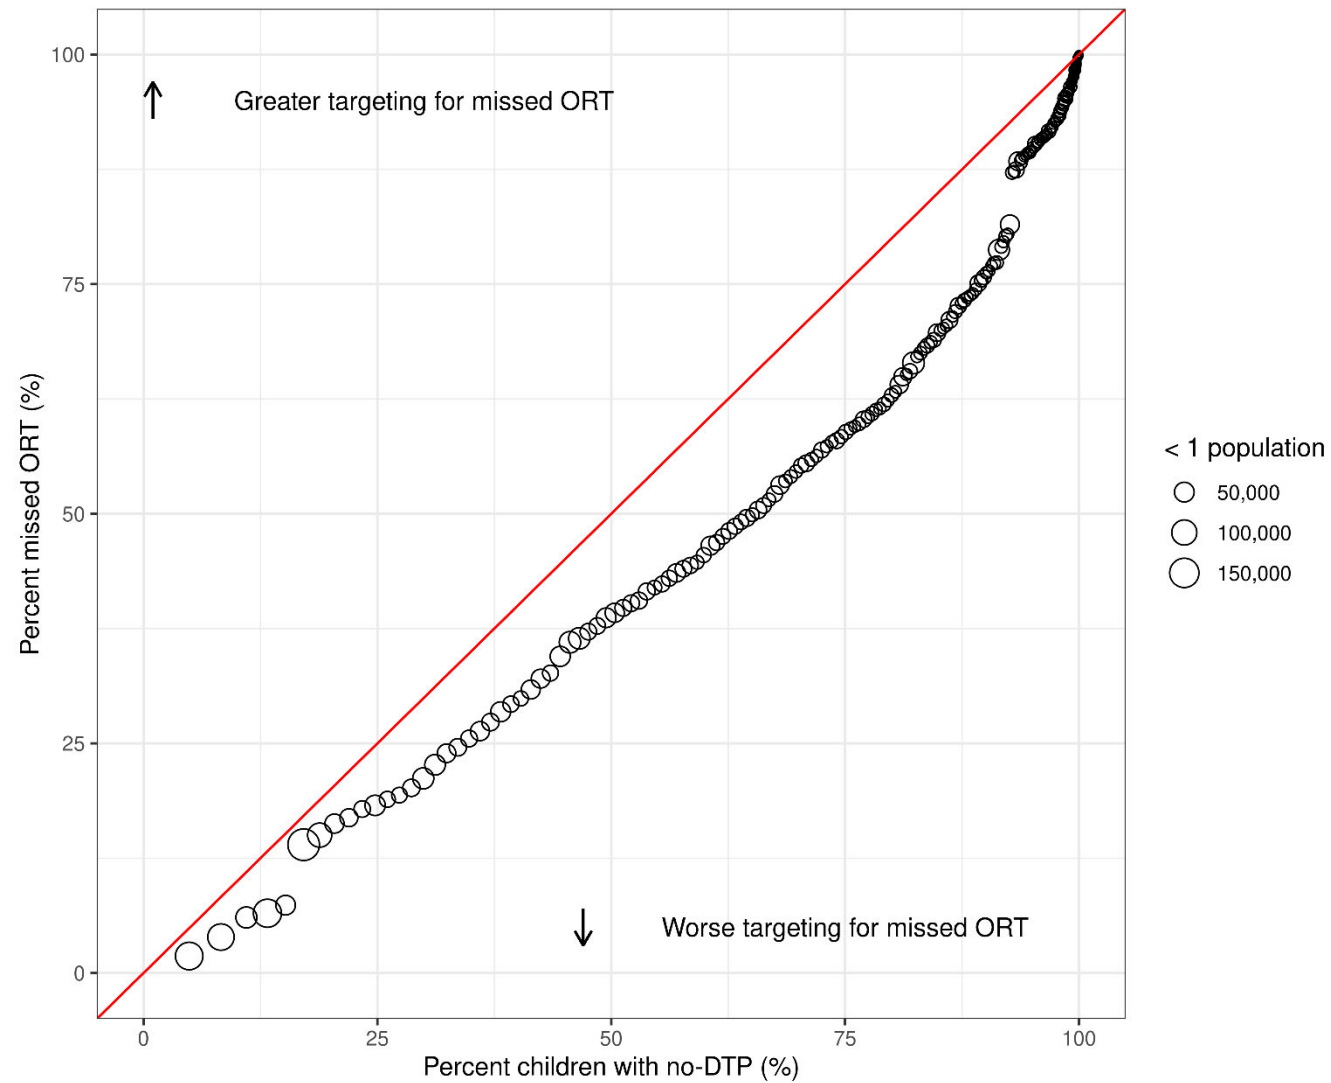

### Supplemental Figure S14: DRC, LF

D.R.C.: cumulative proportions reached with no-DTP targeting

AUC = 0.458

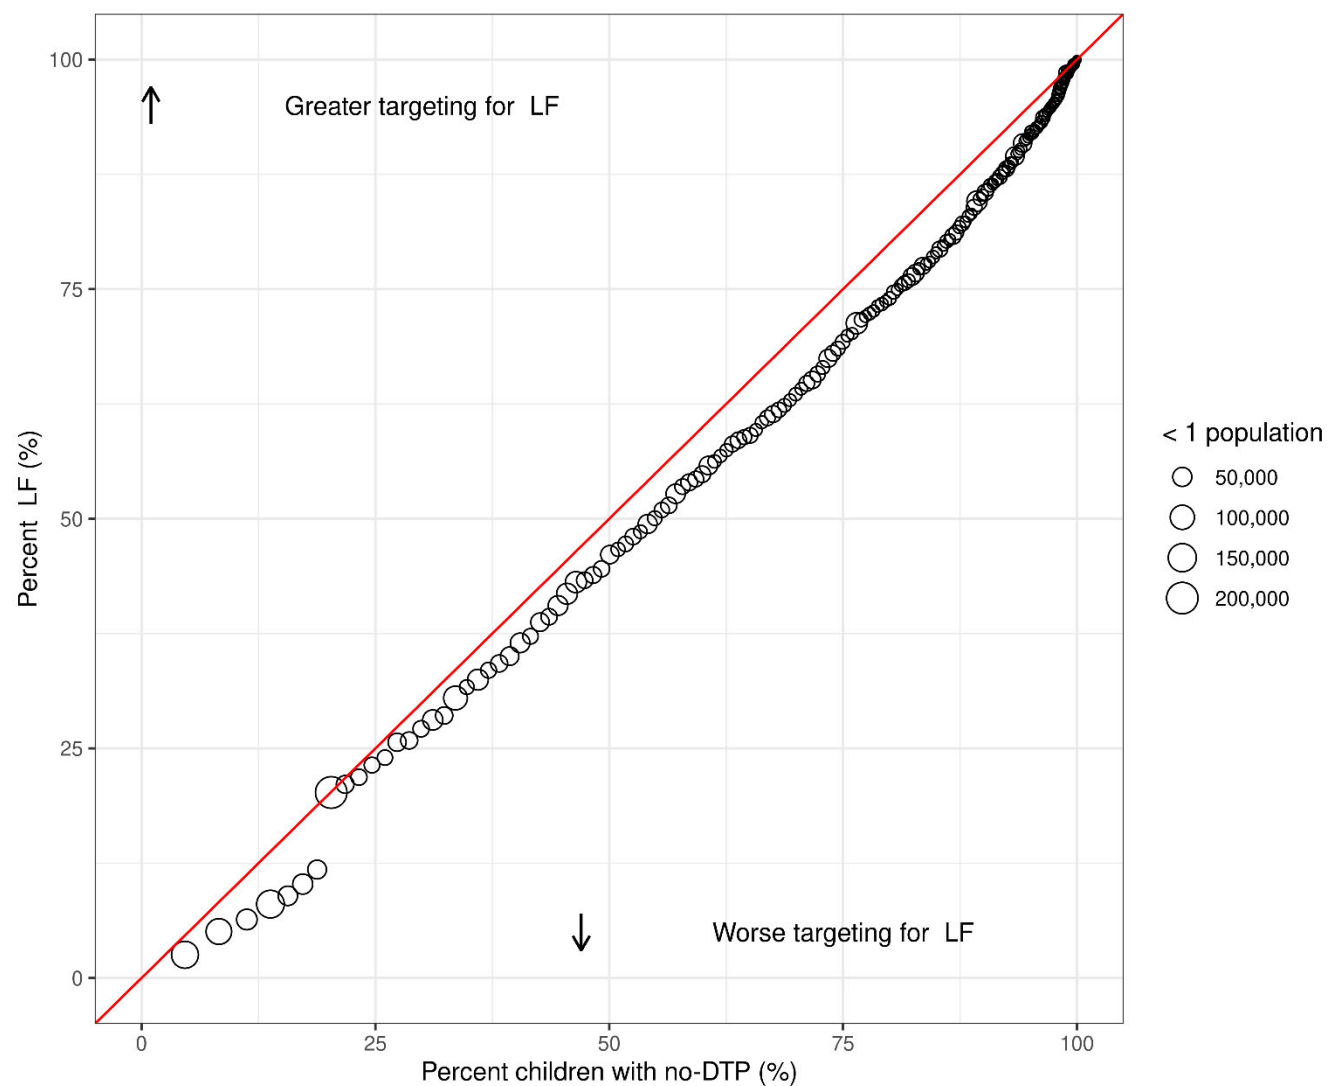

### Supplemental Figure S15: Ethiopia, stunting

Ethiopia: cumulative proportions reached with no-DTP targeting

AUC = 0.448

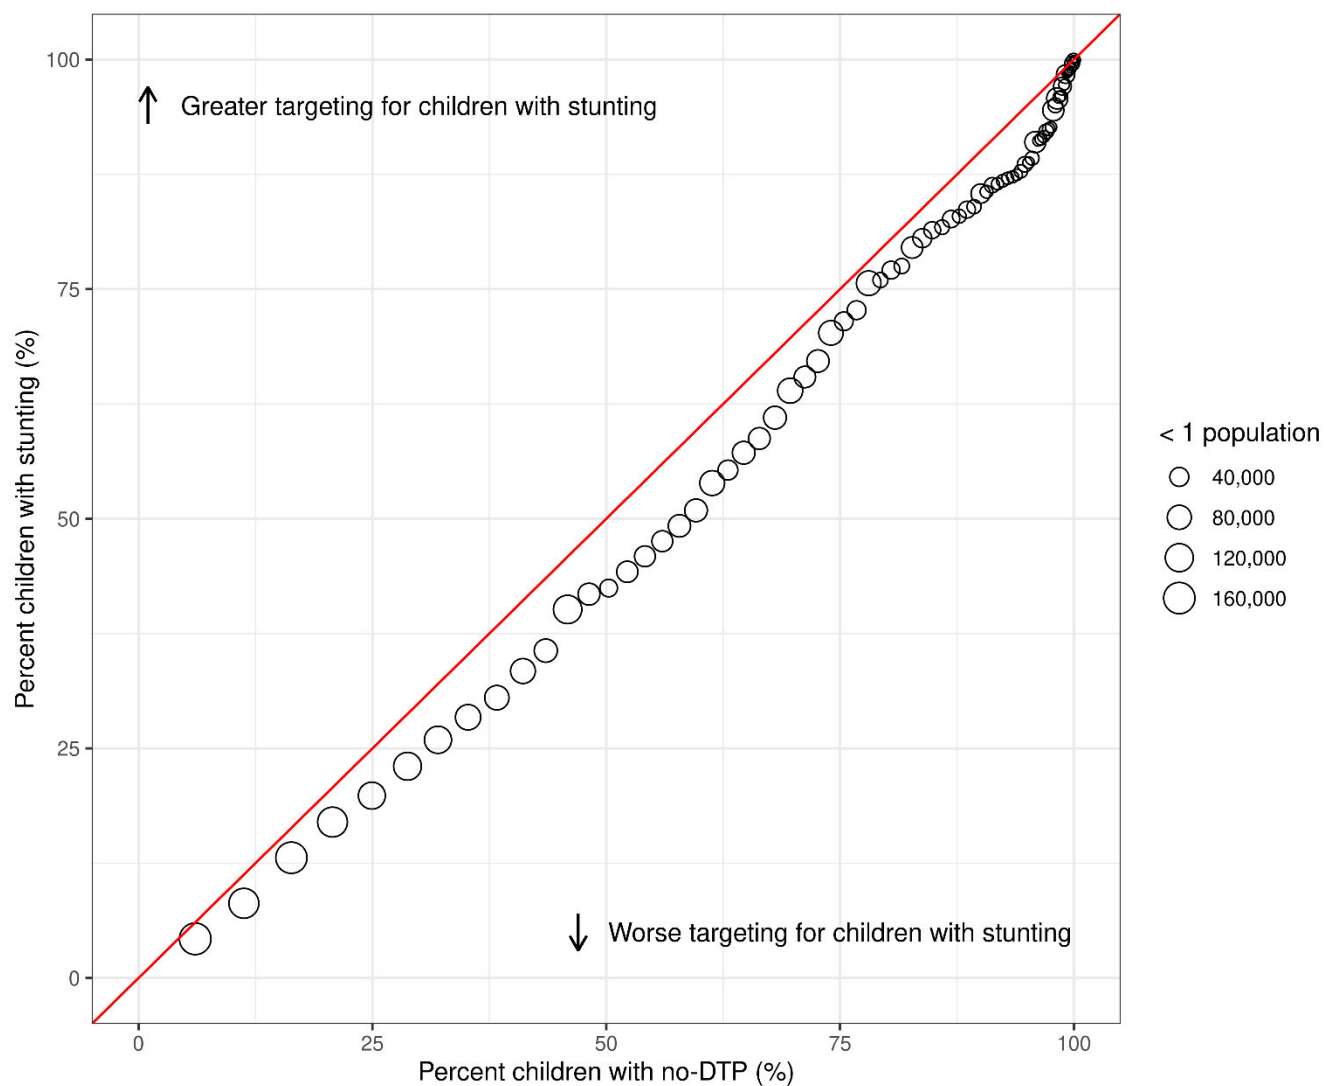

### Supplemental Figure S16: Ethiopia, U5M

Ethiopia: cumulative proportions reached with no-DTP targeting

AUC = 0.424

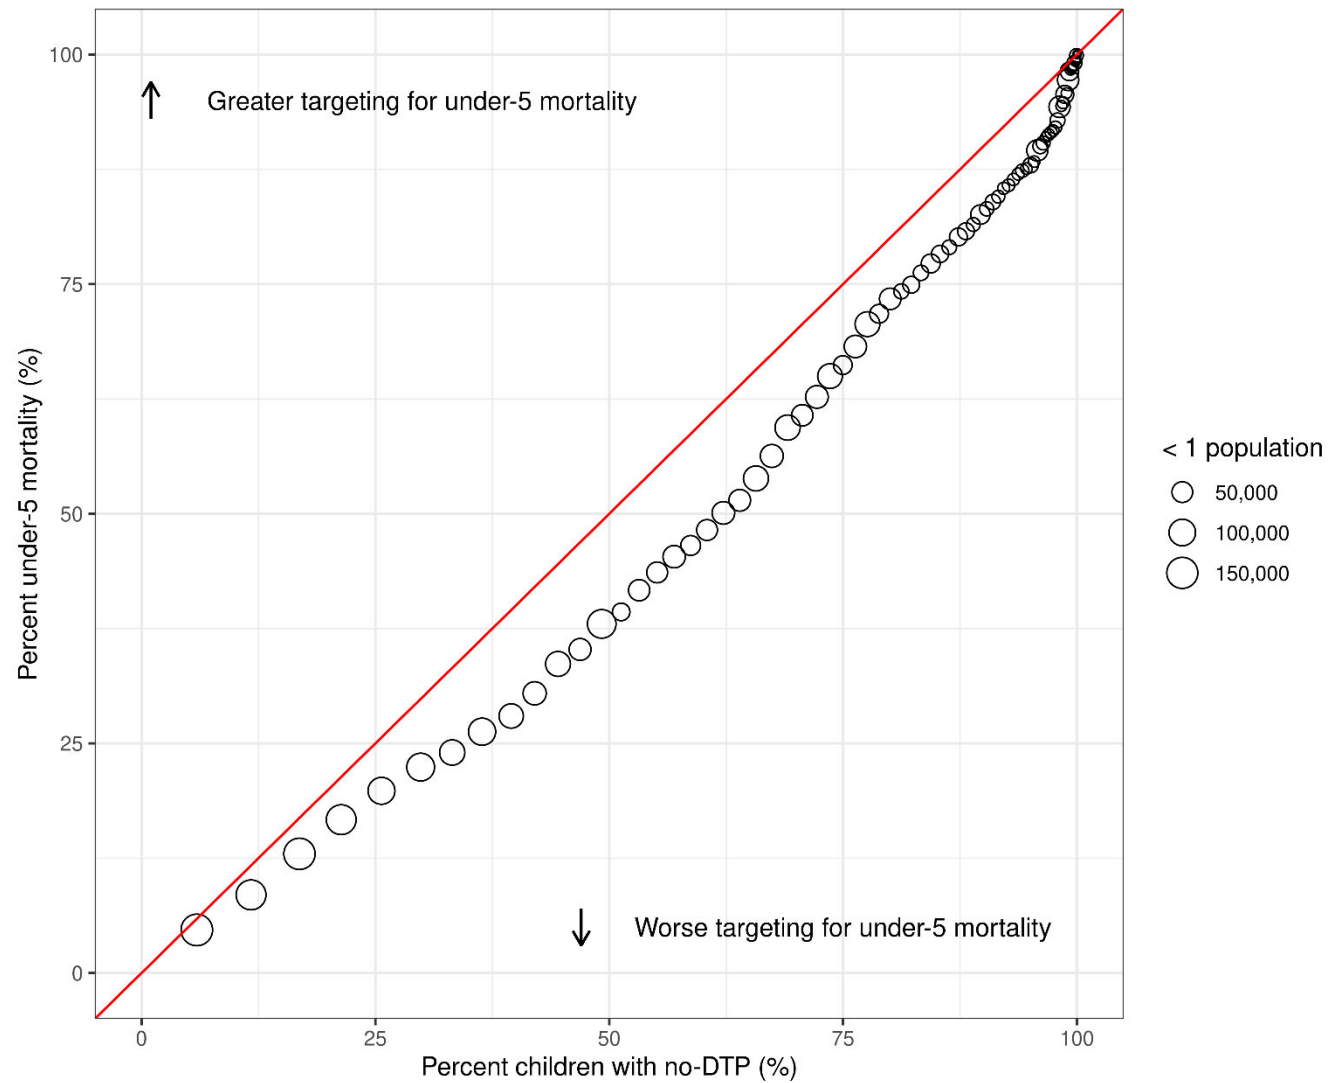

### Supplemental Figure S17: Ethiopia, missed ITNs

Ethiopia: cumulative proportions reached with no-DTP targeting

AUC = 0.429

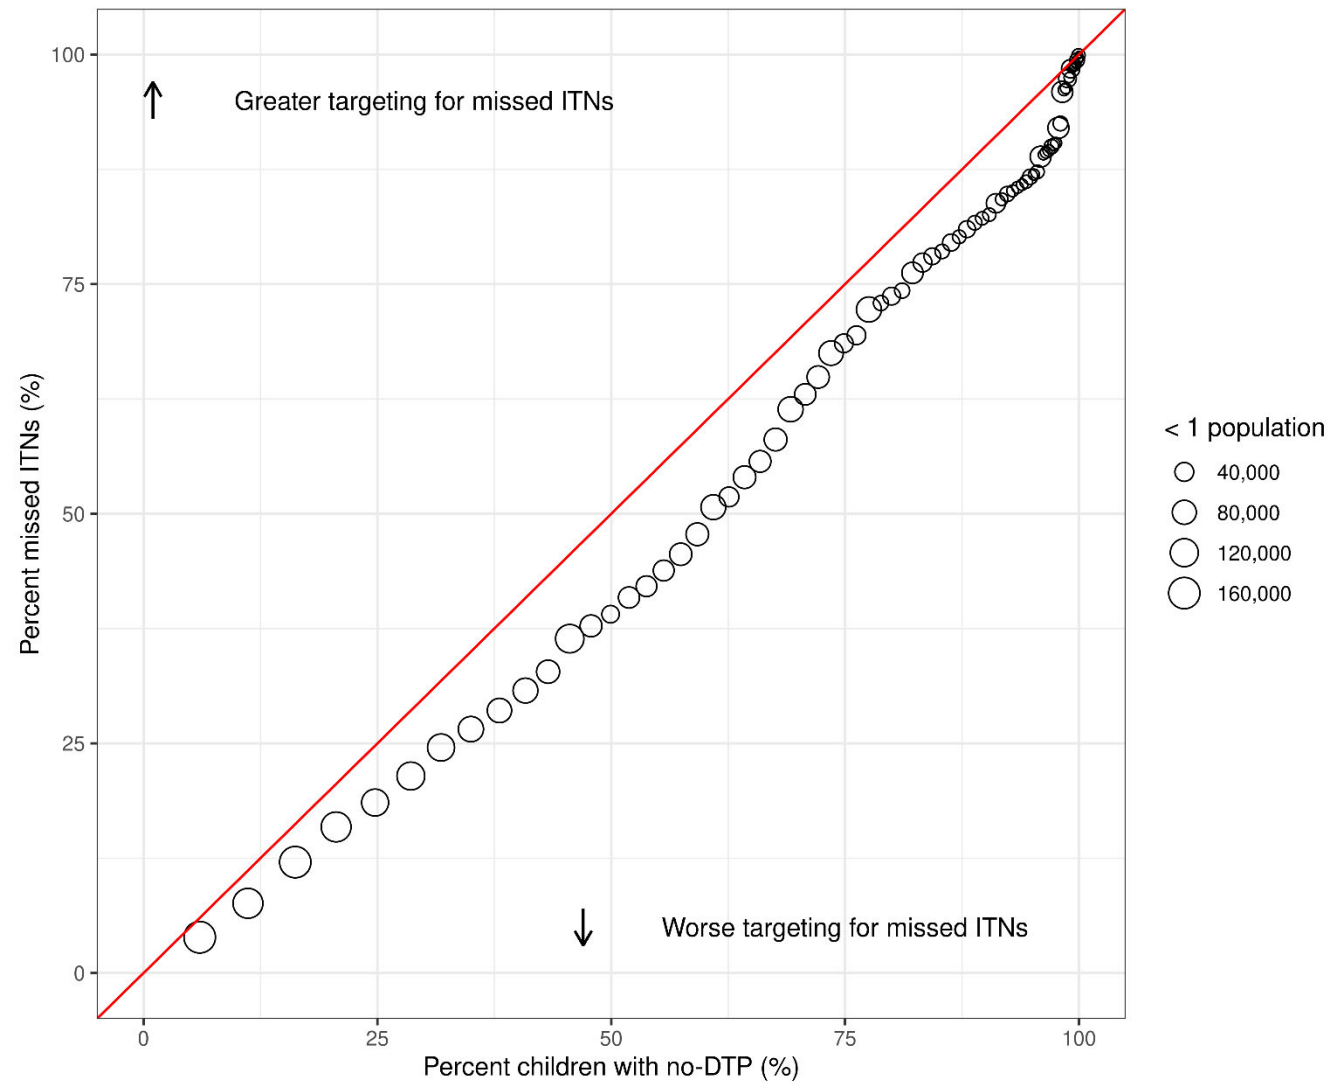

### Supplemental Figure S18: Ethiopia, missed ORT

Ethiopia: cumulative proportions reached with no-DTP targeting

AUC = 0.419

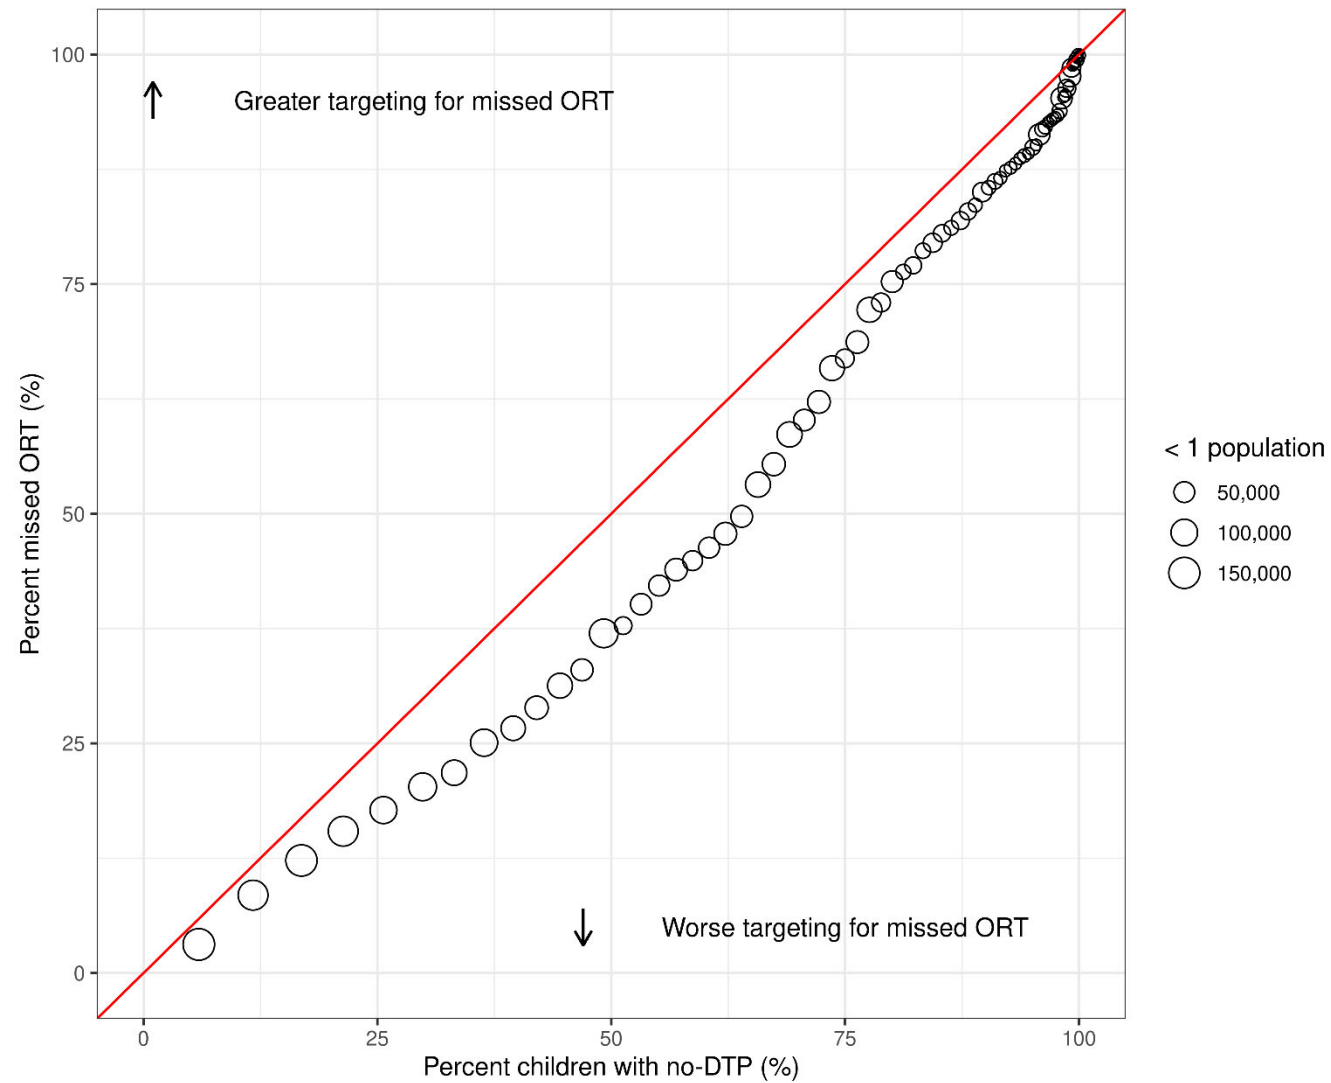

### Supplemental Figure S19: Ethiopia, LF

Ethiopia: cumulative proportions reached with no-DTP targeting

AUC = 0.456

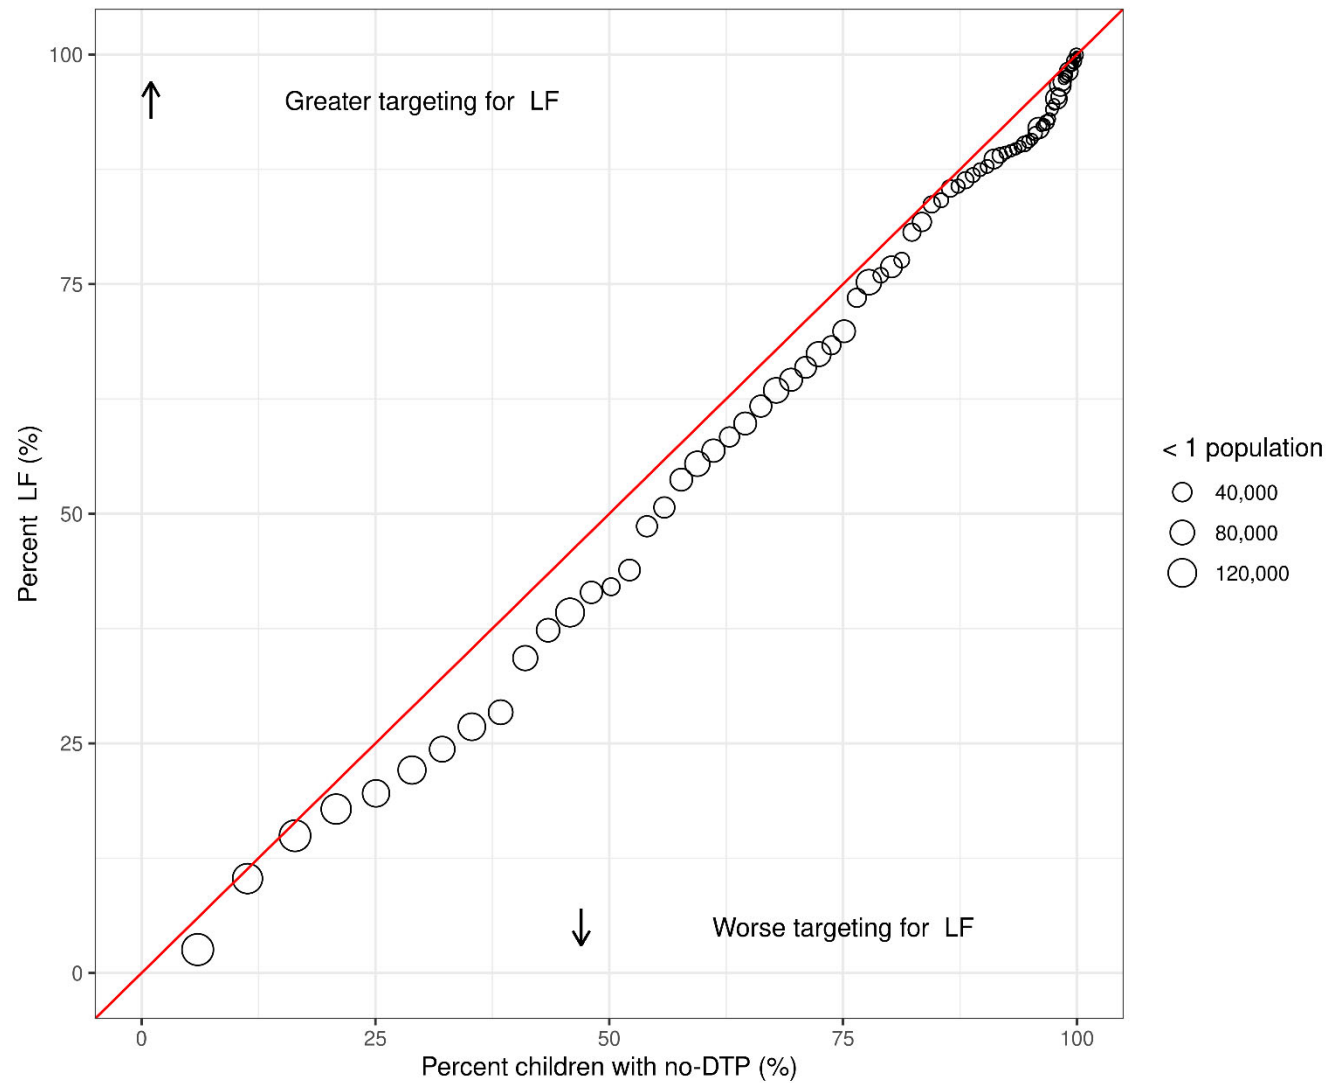

### Supplemental Figure S20: Indonesia, stunting

Indonesia: cumulative proportions reached with no-DTP targeting

AUC = 0.432

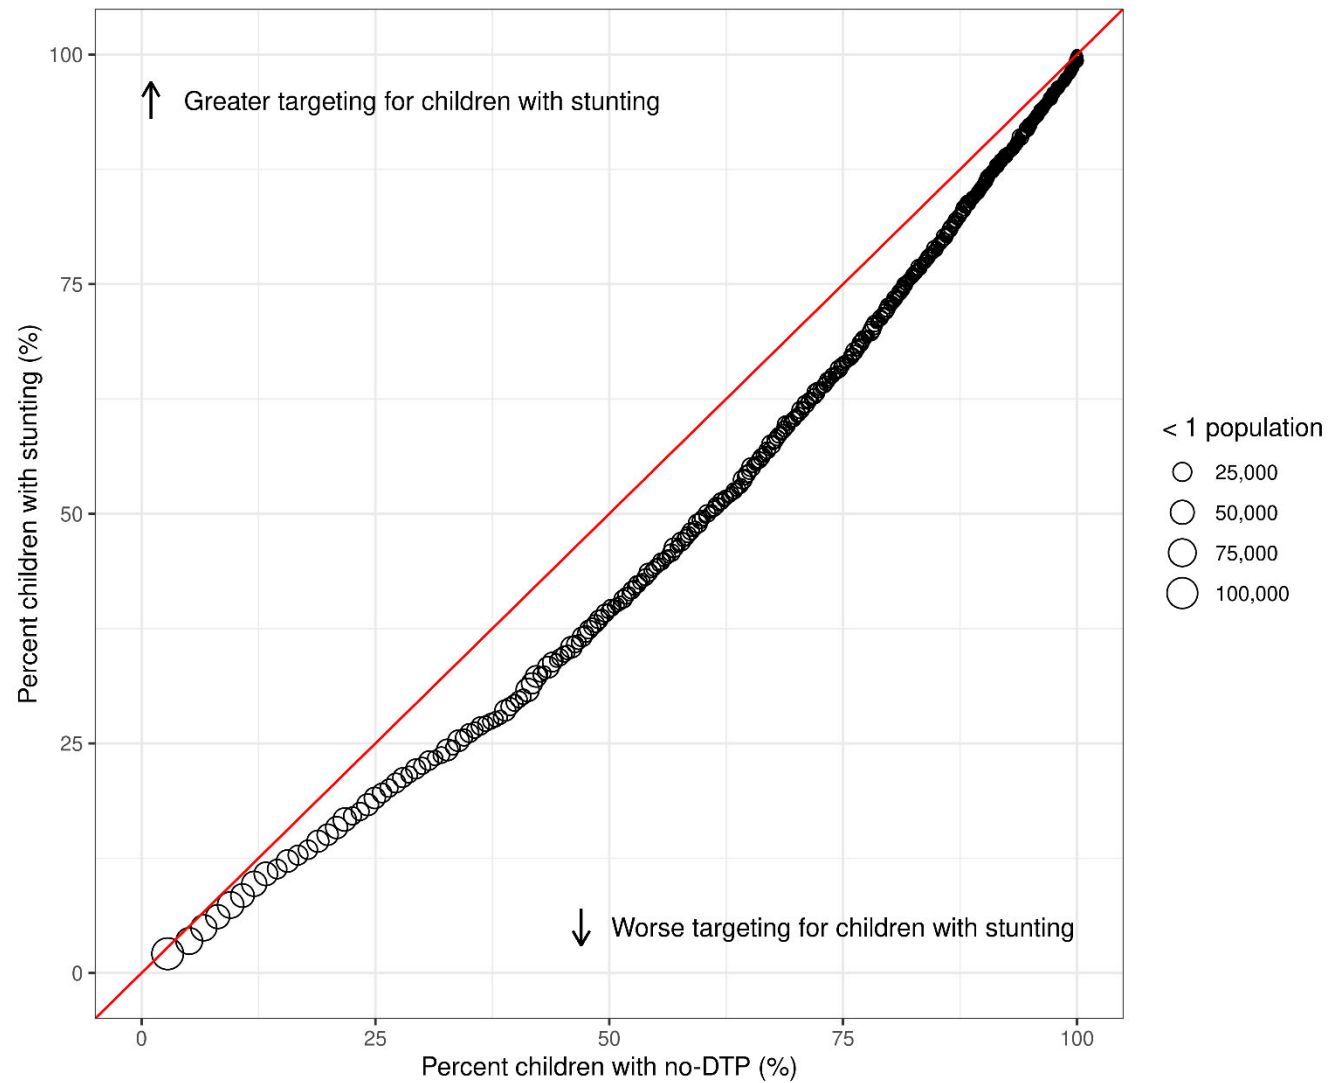

### Supplemental Figure S21: Indonesia, U5M

Indonesia: cumulative proportions reached with no-DTP targeting

AUC = 0.41

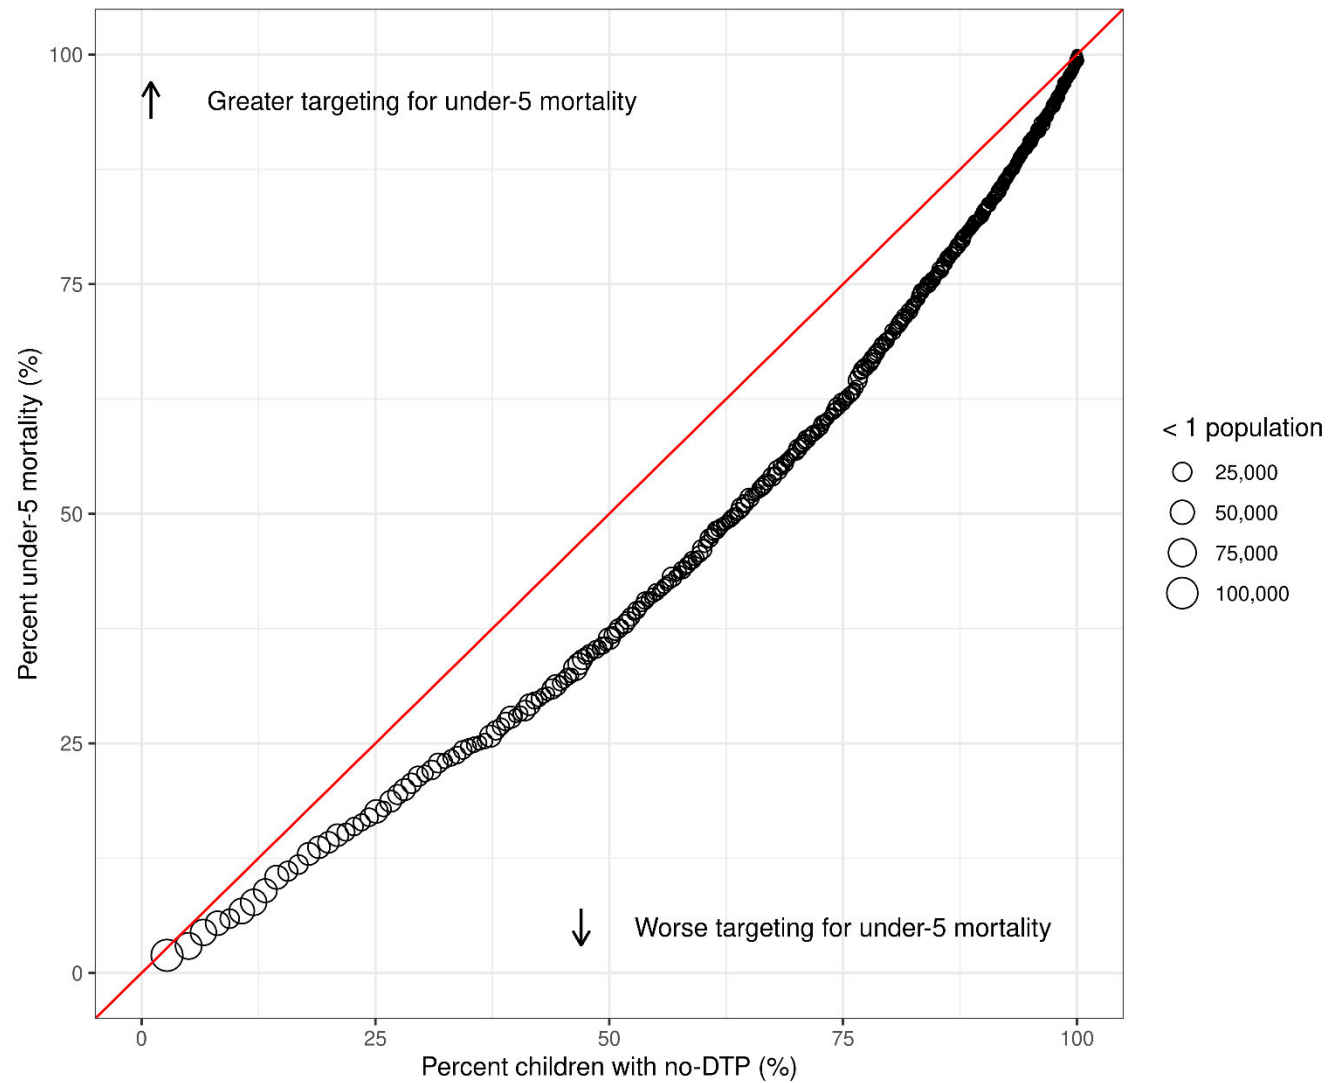

### Supplemental Figure S22: Indonesia, missed ORT

Indonesia: cumulative proportions reached with no-DTP targeting

AUC = 0.434

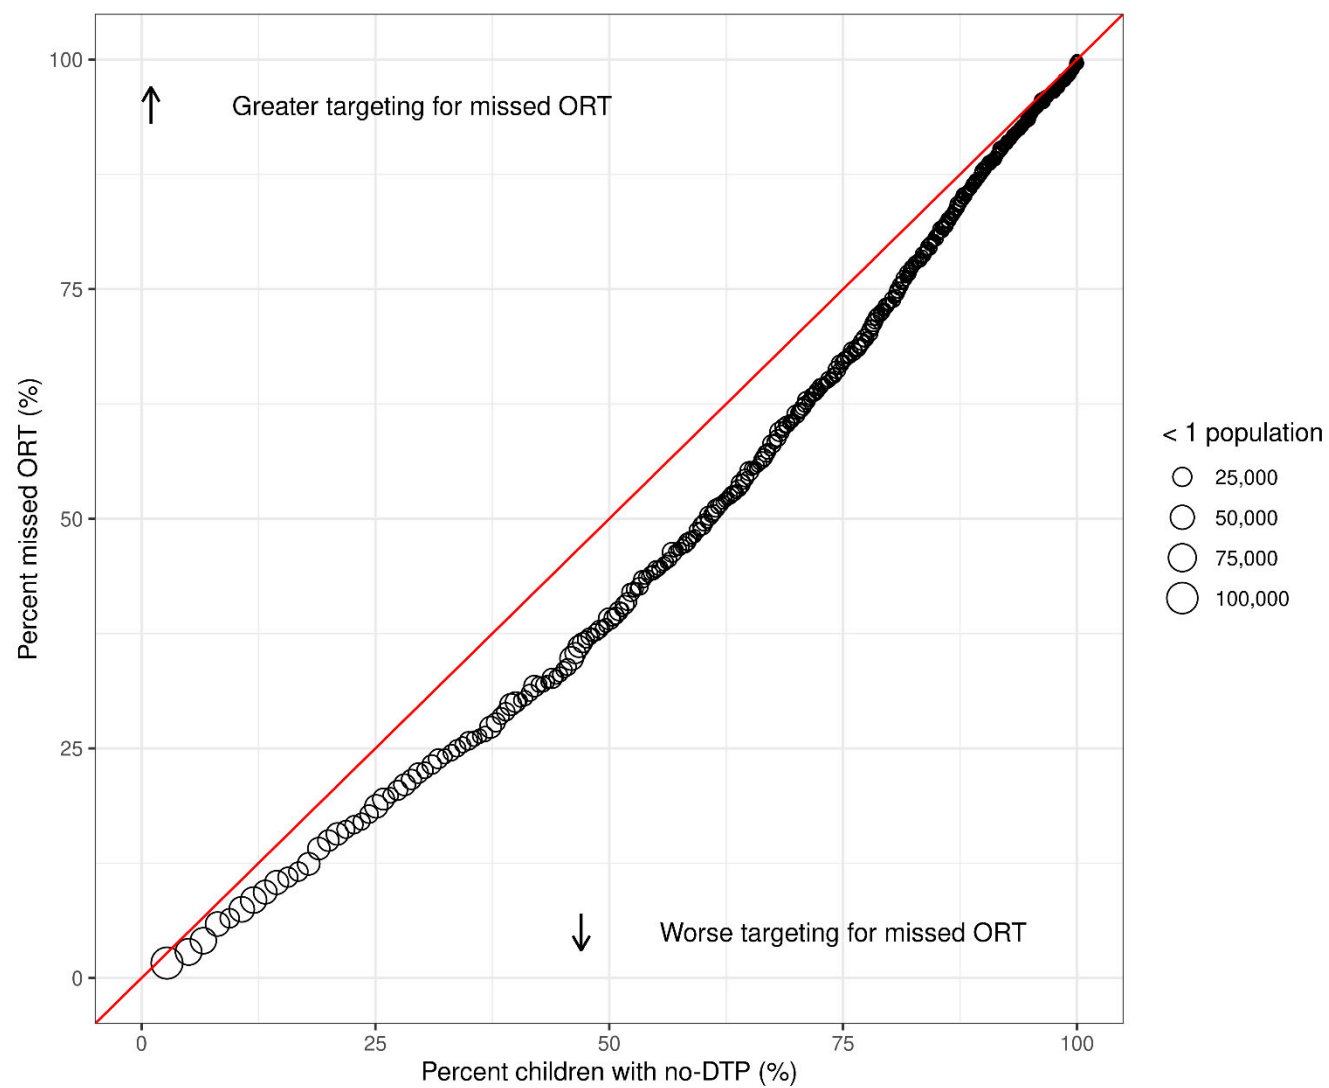

### Supplemental Figure S23: Indonesia, LF

Indonesia: cumulative proportions reached with no-DTP targeting

AUC = 0.327

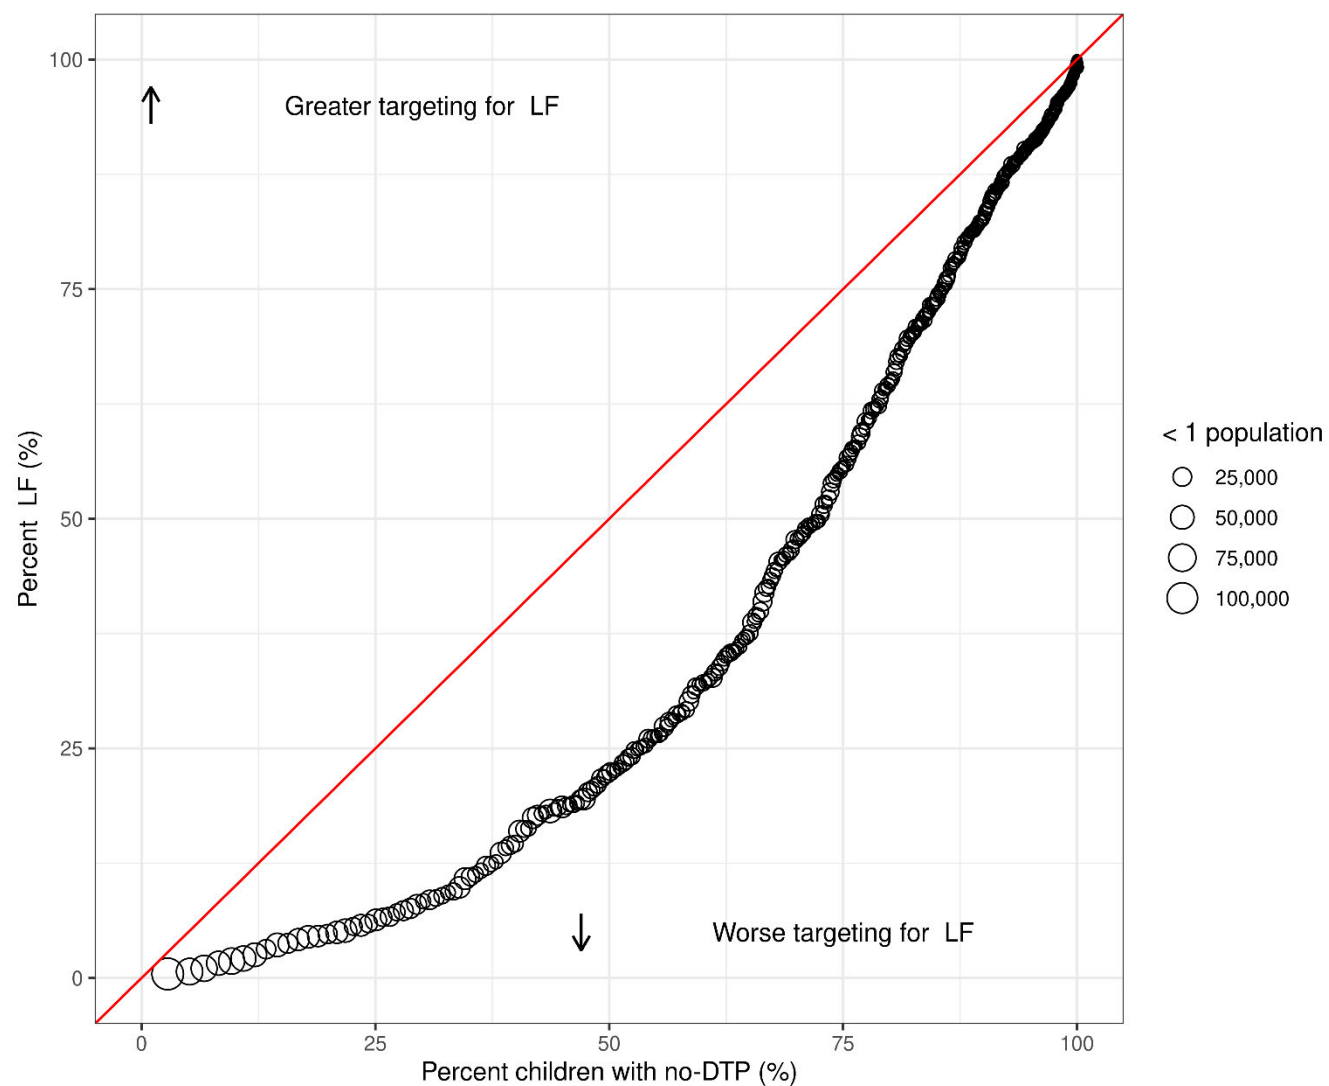

*Supplemental Figures S24–S46: Country-specific, all quartile overlap.*

Country-specific overlap between no-DTP and each indicator (children with stunting, U5M, missed ITNs, missed ORT, LF), for each country (Nigeria, Angola, DRC, Ethiopia and Indonesia), for all categorization quartiles. The top row (a) shows categorization based on prevalence, while the bottom row (b) shows categorization based on counts. Population-weighted quartile ranges for no-DTP and the comparator indicator are delineated in the bivariate color legends (center). District-level values are shown both as maps (left) and with scatterplots (right), with colors corresponding to quartile legend values. Point size in scatterplots reflects relative size of under 1 population in each district.

## Supplemental Figure S24 Nigeria, U5M

(A) No-DTP and under-5 mortality quartiles (%): Nigeria

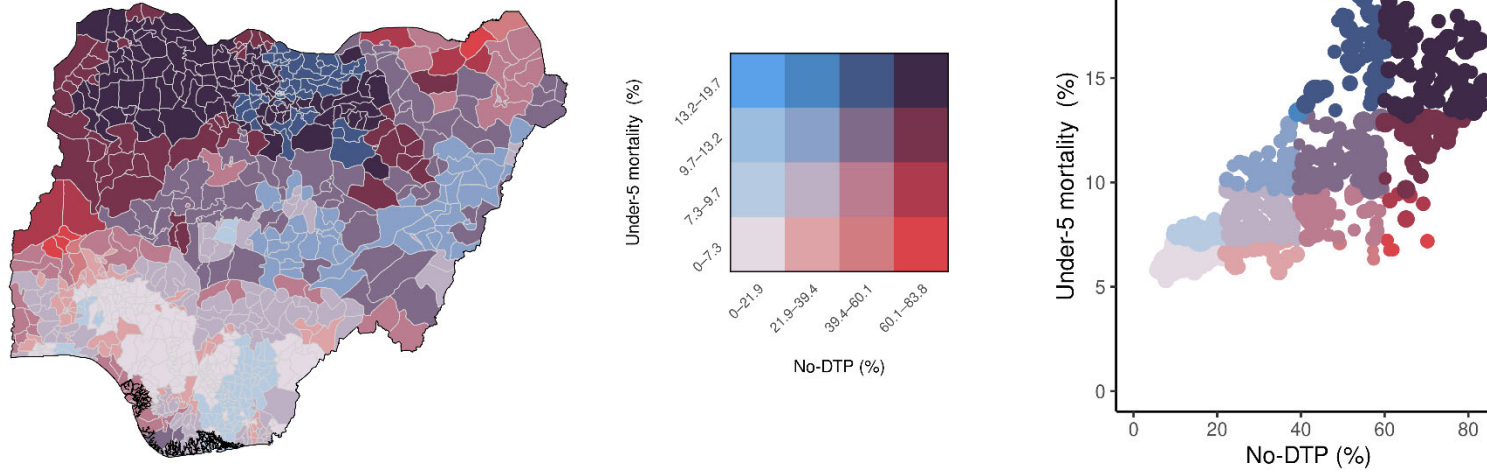

(B) No-DTP and under-5 mortality quartiles (counts): Nigeria

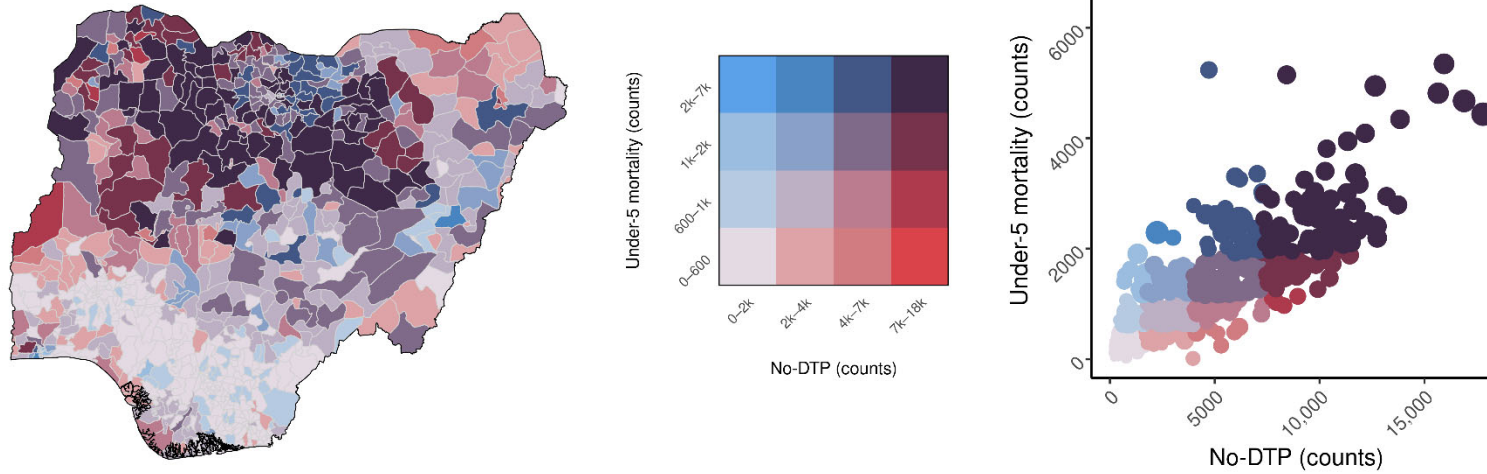

## Supplemental Figure S25: Nigeria, missed ITNs

(A) No-DTP and missed ITNs quartiles (%): Nigeria

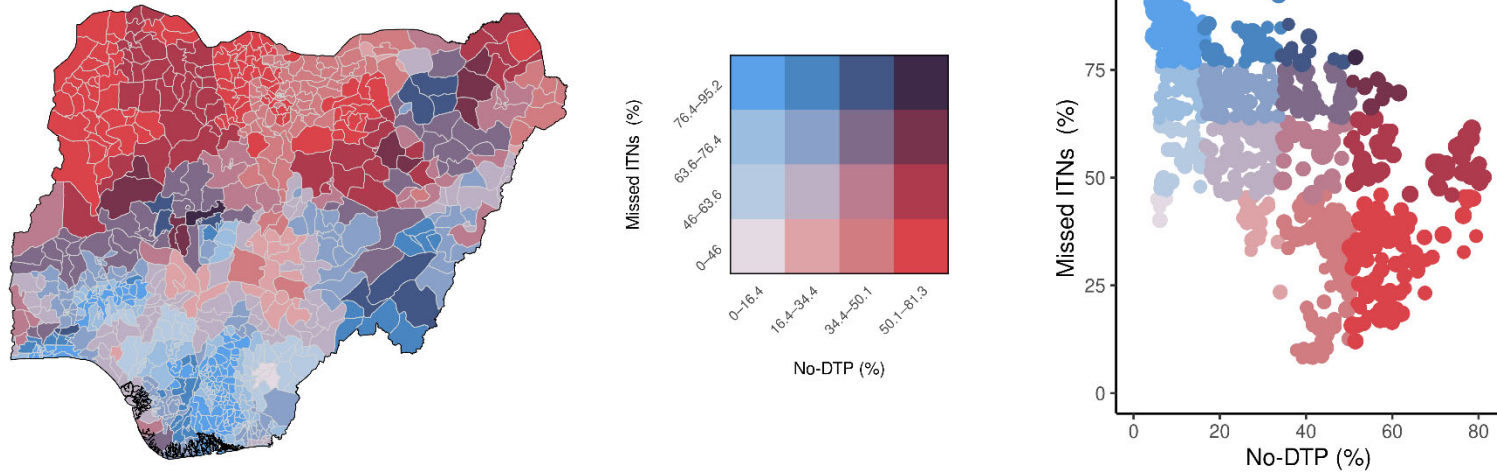

(B) No-DTP and missed ITNs quartiles (counts): Nigeria

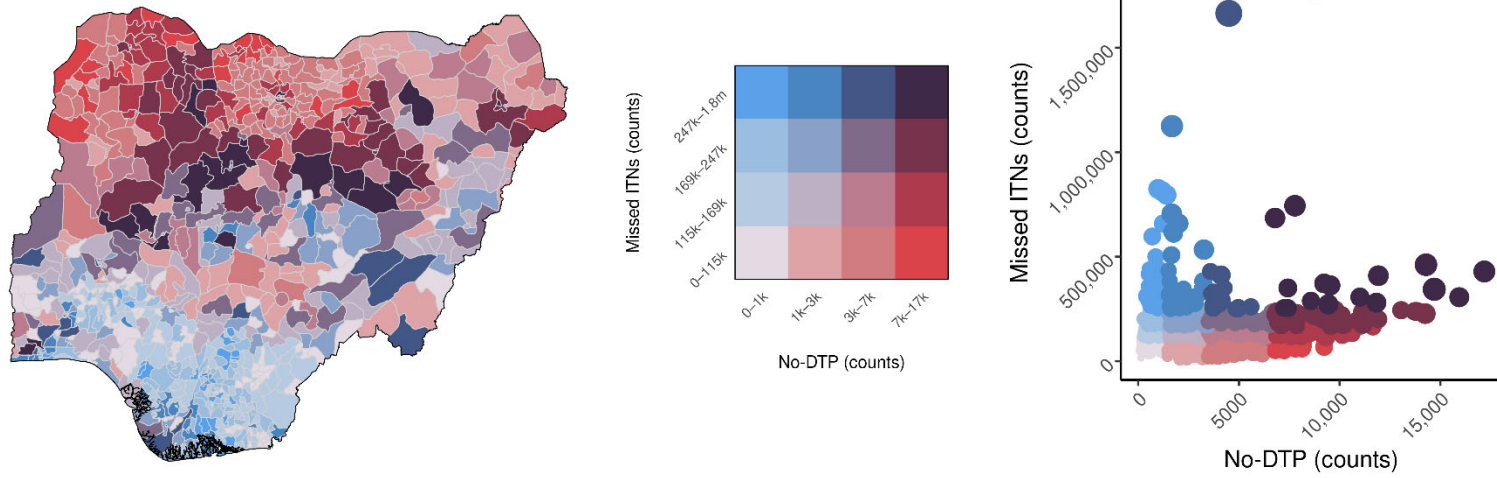

## Supplemental Figure S26: Nigeria, missed ORT

(A) No-DTP and missed ORT quartiles (%): Nigeria

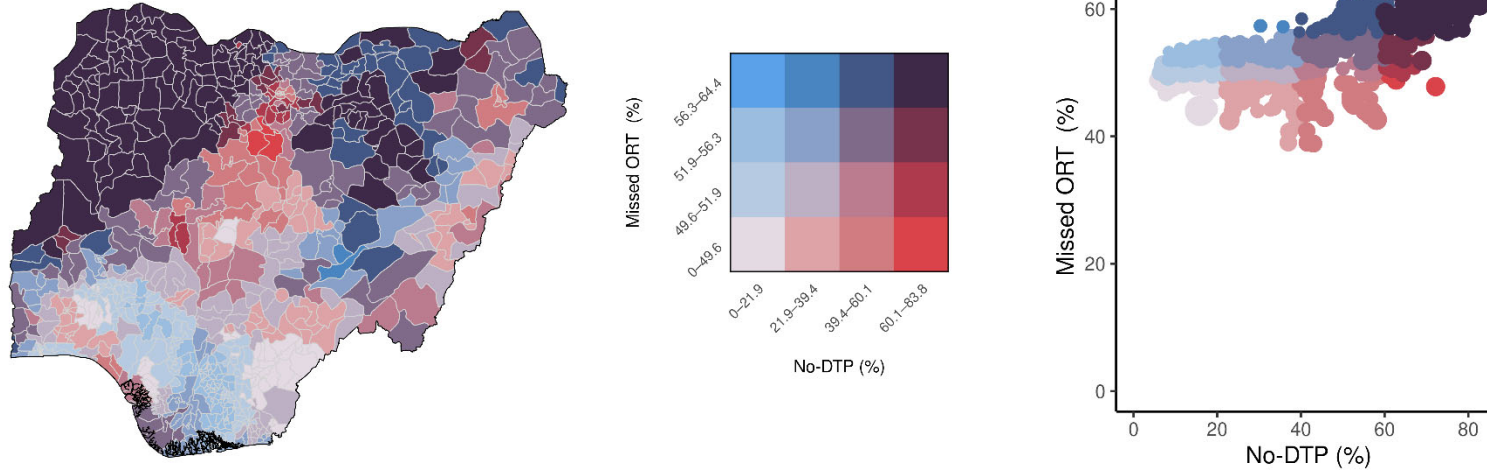

(B) No-DTP and missed ORT quartiles (counts): Nigeria

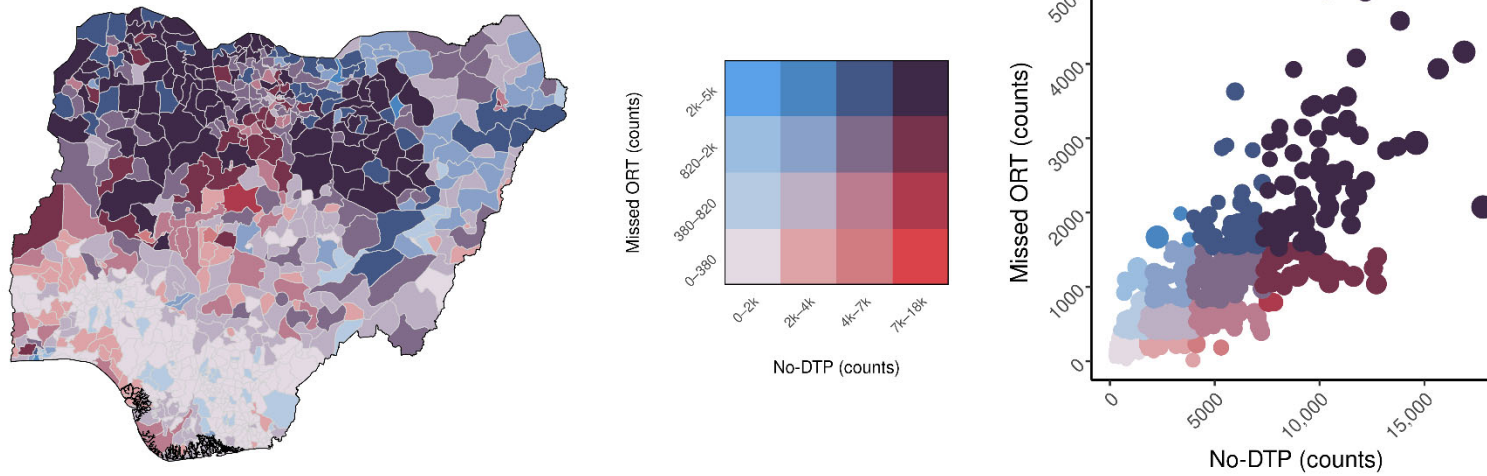

## Supplemental Figure S27: Nigeria, LF

(A) No-DTP and LF quartiles (%): Nigeria

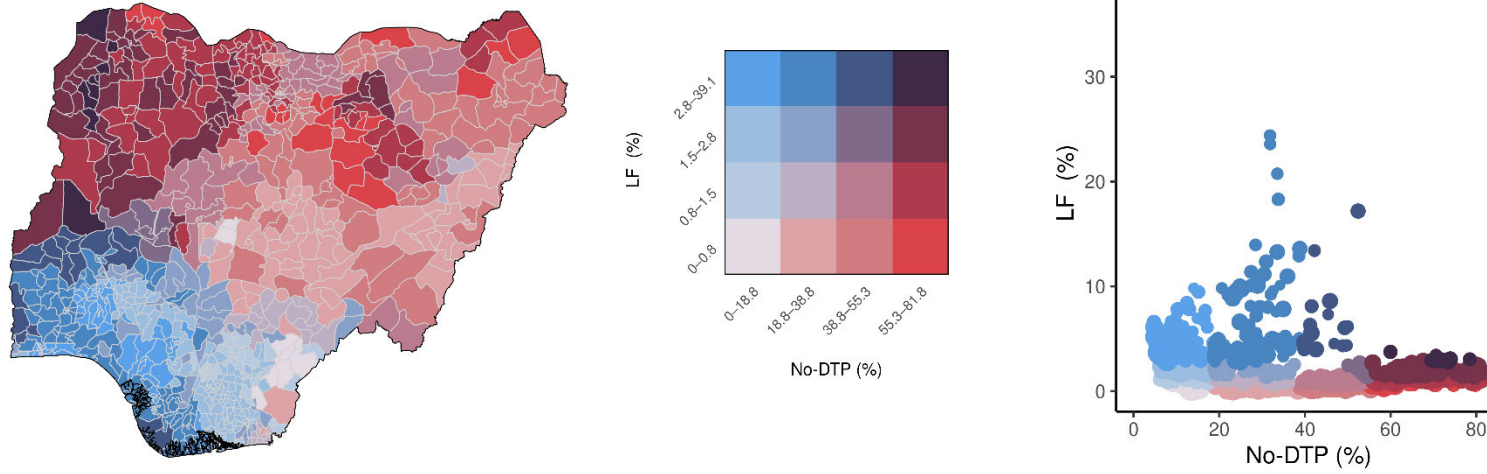

(B) No-DTP and LF quartiles (counts): Nigeria

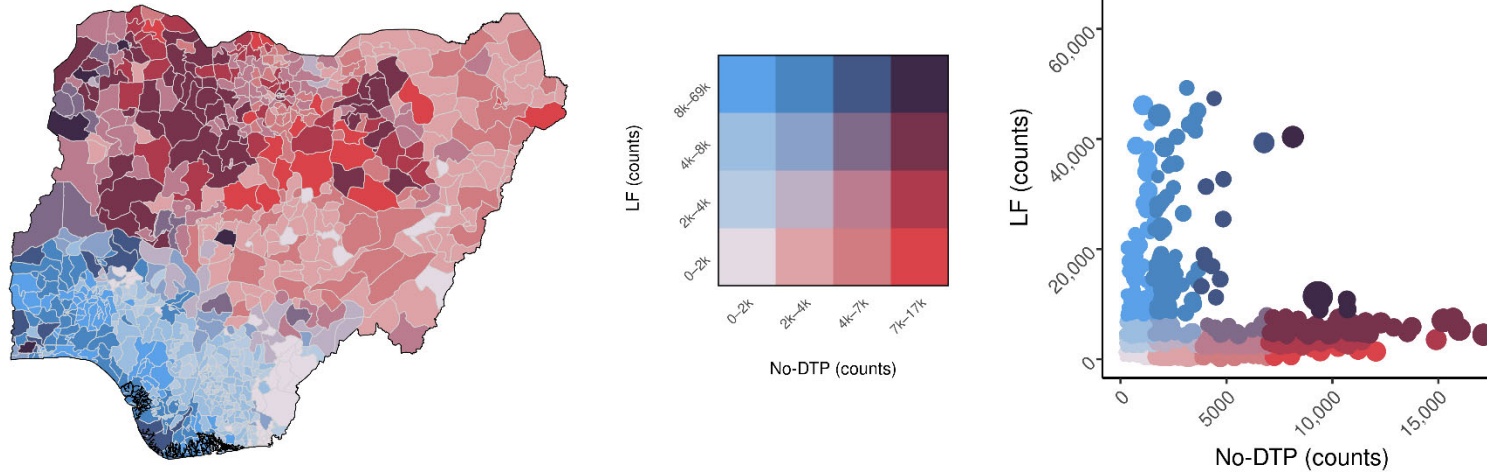

## Supplemental Figure S28: Angola, stunting

(A) No-DTP and children with stunting quartiles (%): Angola

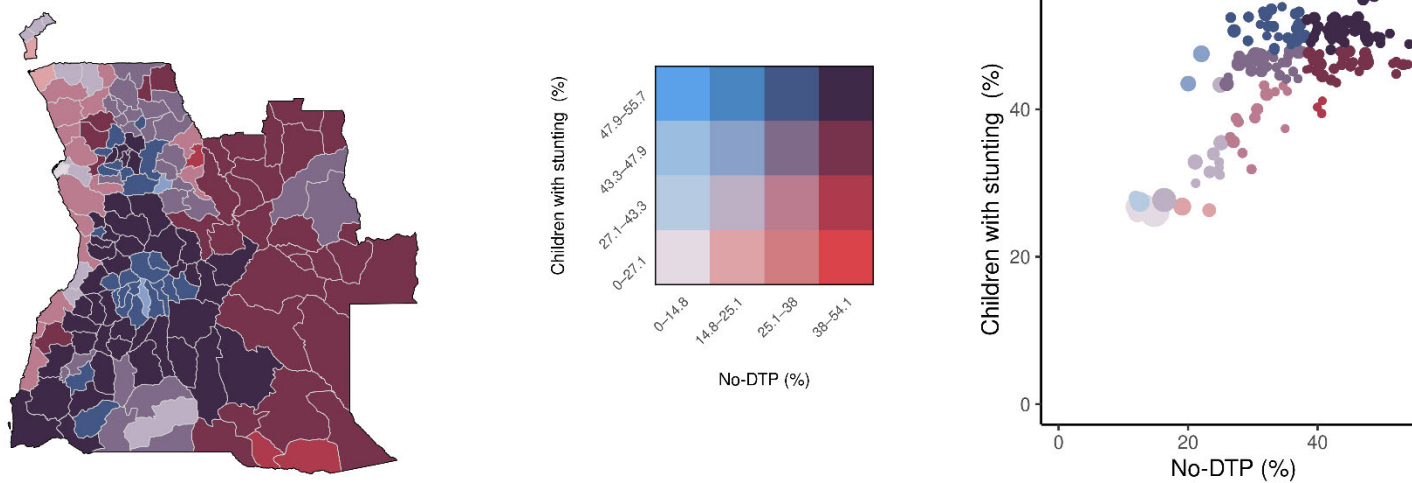

(B) No-DTP and children with stunting quartiles (counts): Angola

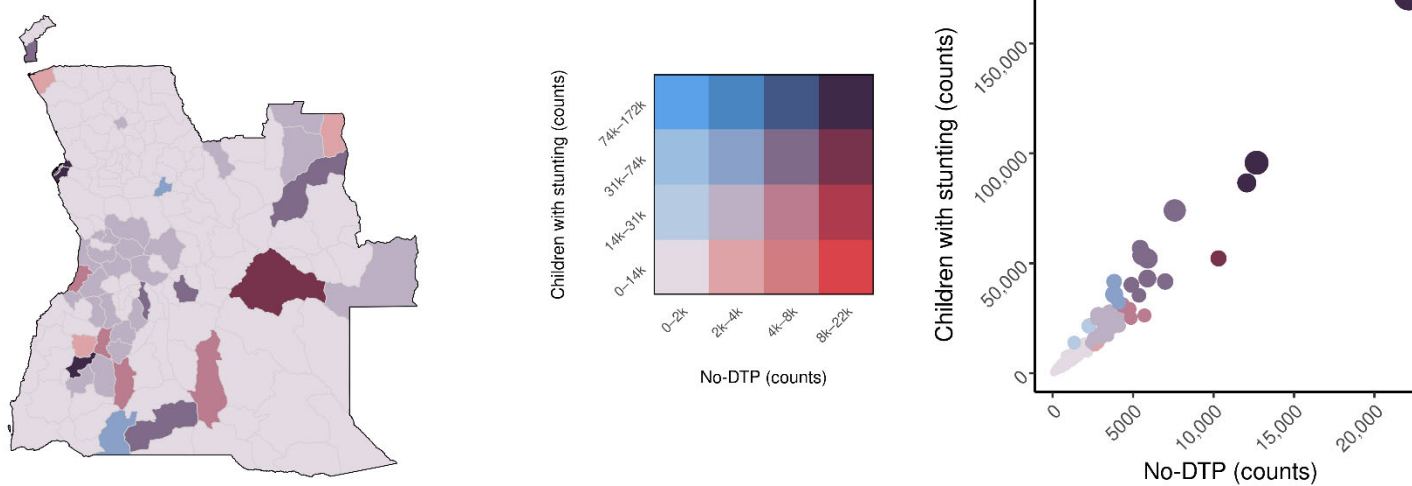

## Supplemental Figure S29: Angola, U5M

(A) No-DTP and under-5 mortality quartiles (%): Angola

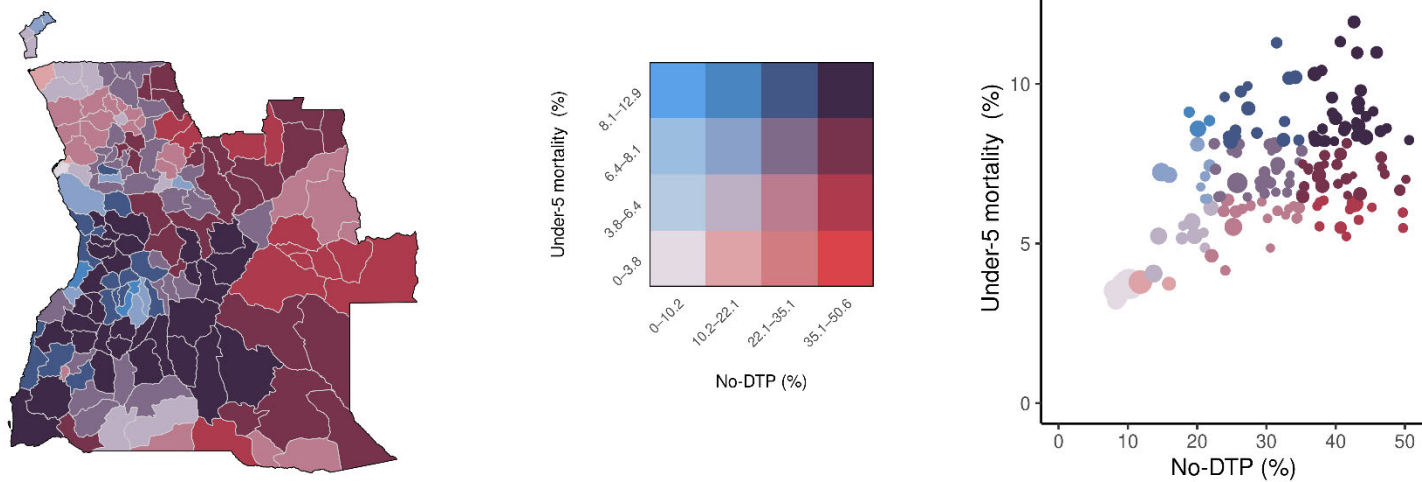

(B) No-DTP and under-5 mortality quartiles (counts): Angola

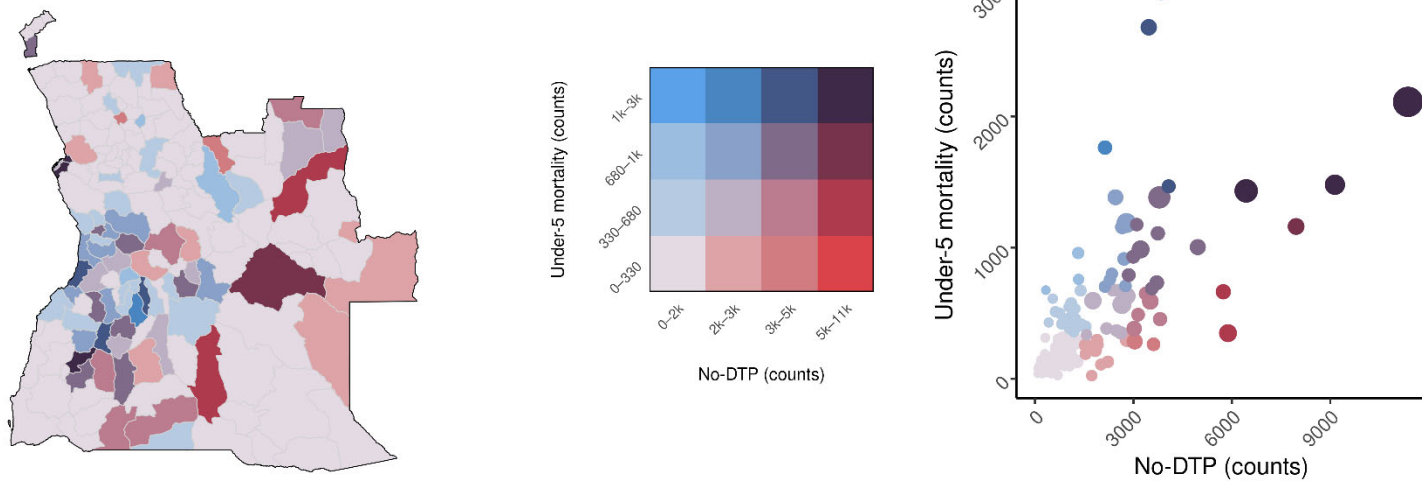

# Supplemental Figure S30: Angola, missed ORT

(A) No-DTP and missed ORT quartiles (%): Angola

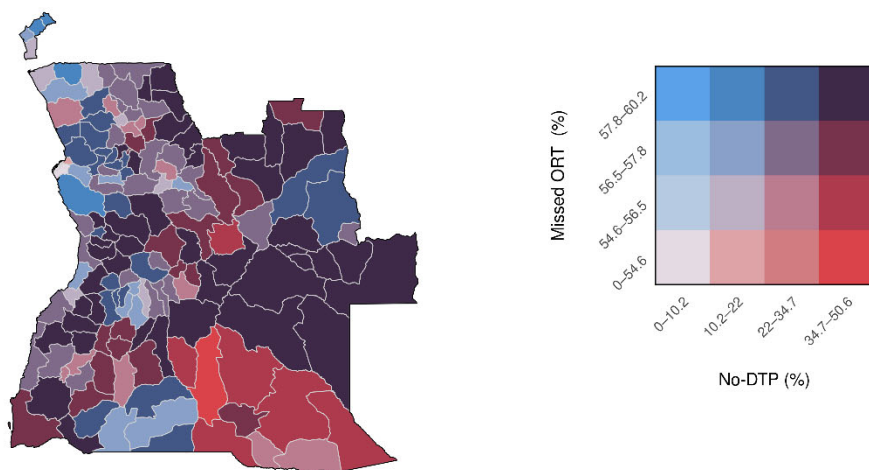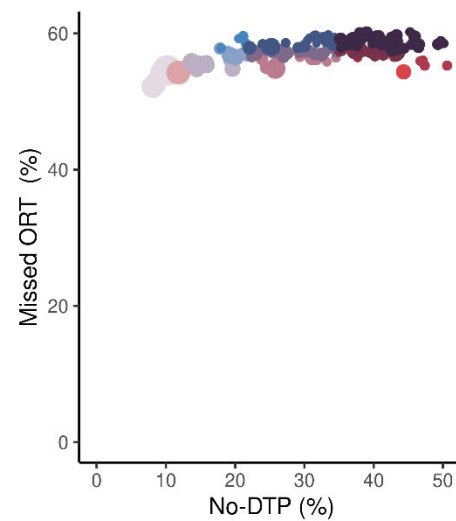

(B) No-DTP and missed ORT quartiles (counts): Angola

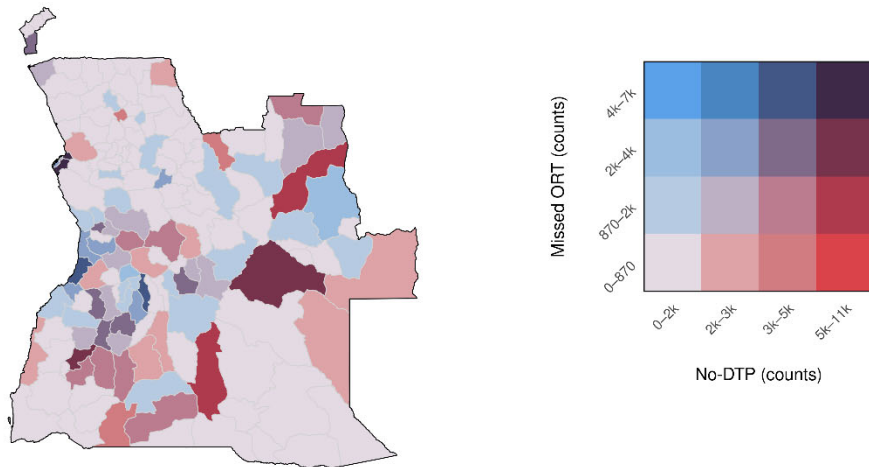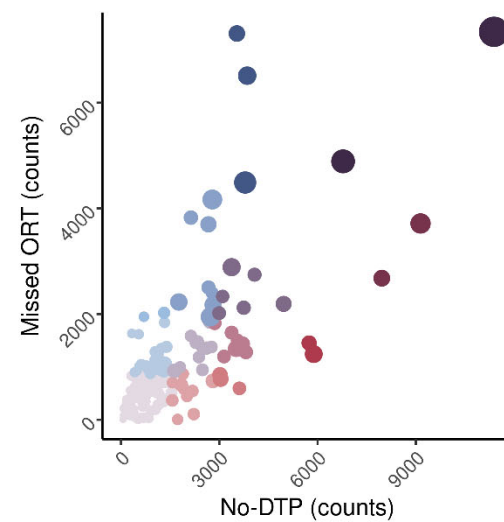

## Supplemental Figure S31: Angola, missed ITNs

(A) No-DTP and missed ITNs quartiles (%): Angola

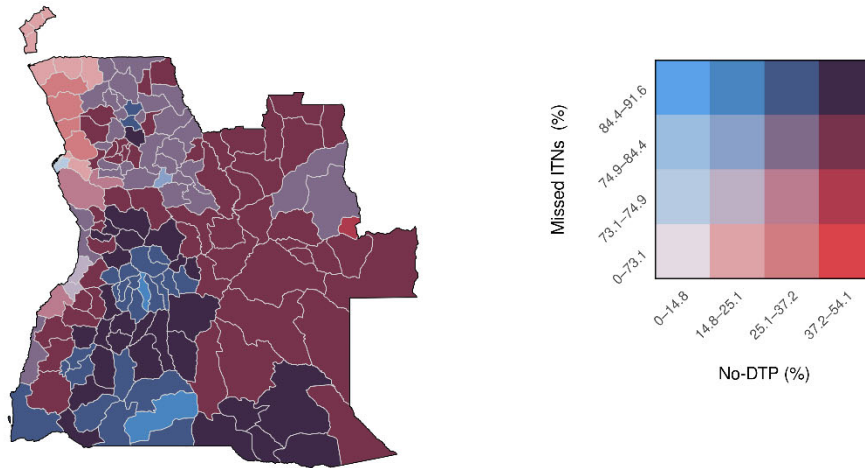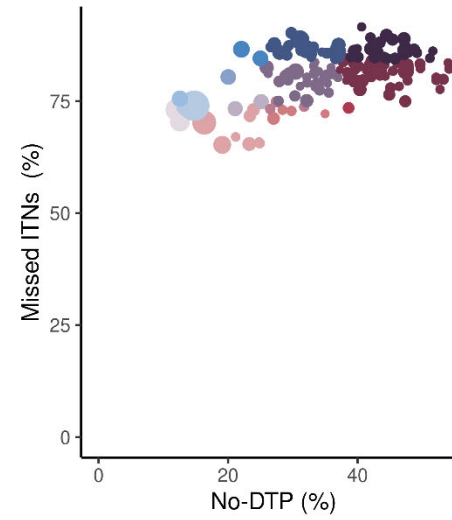

(B) No-DTP and missed ITNs quartiles (counts): Angola

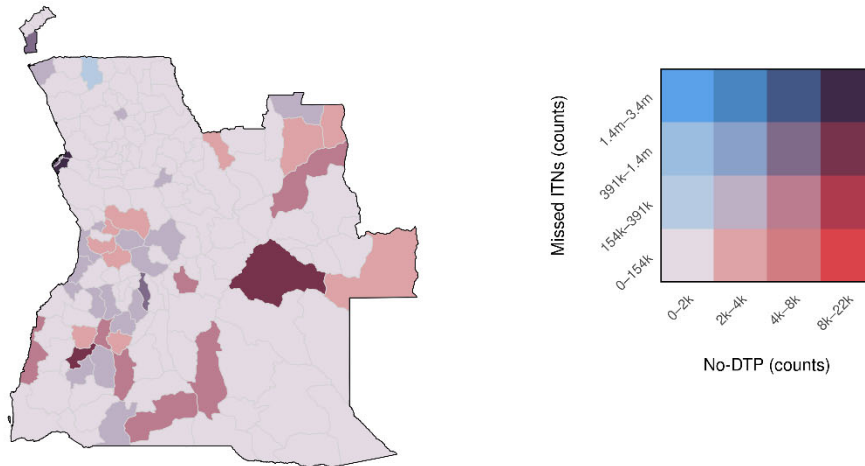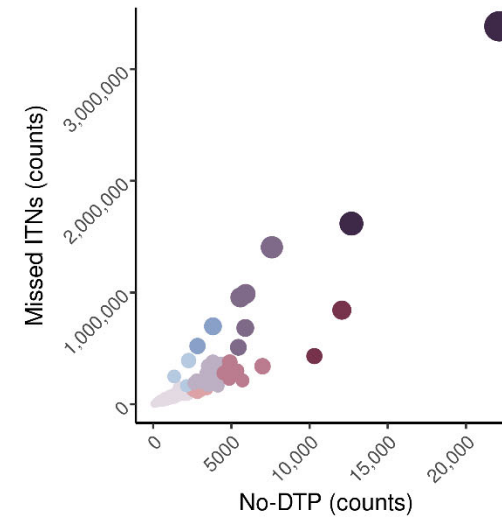

## Supplemental Figure S32: Angola, LF

(A) No-DTP and LF quartiles (%): Angola

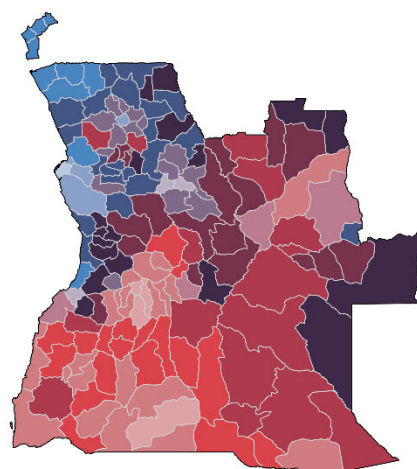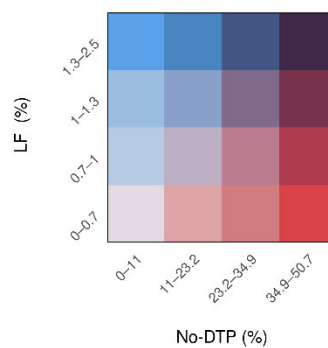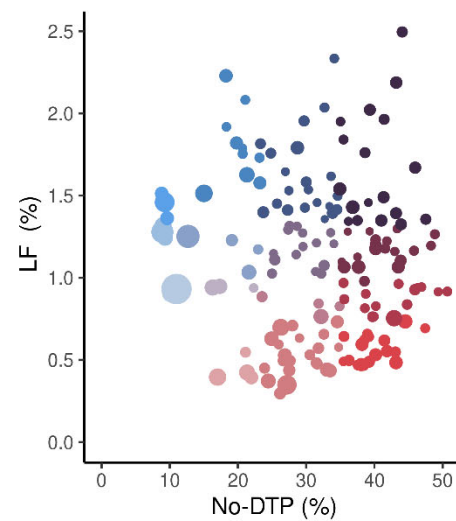

(B) No-DTP and LF quartiles (counts): Angola

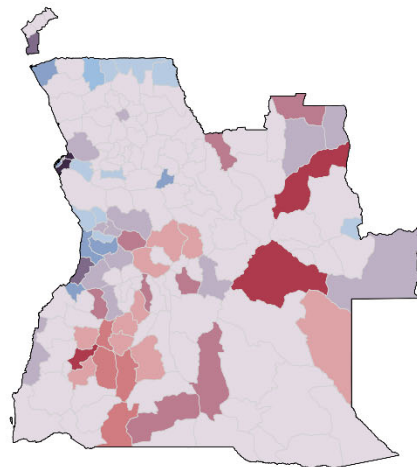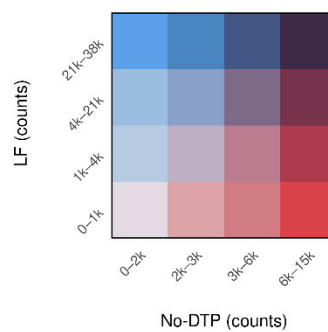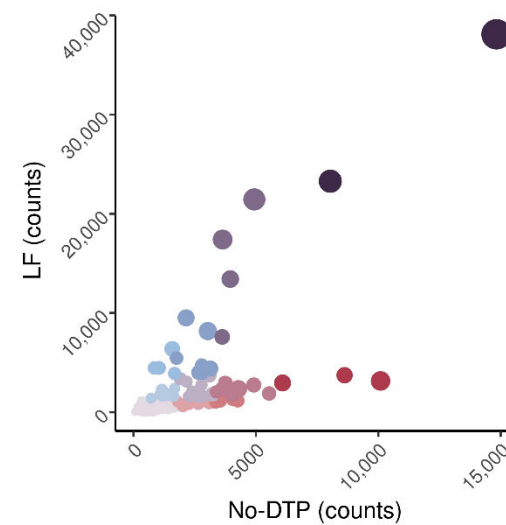

## Supplemental Figure S33: DRC, stunting

(A) No-DTP and children with stunting quartiles (%): D.R.C.

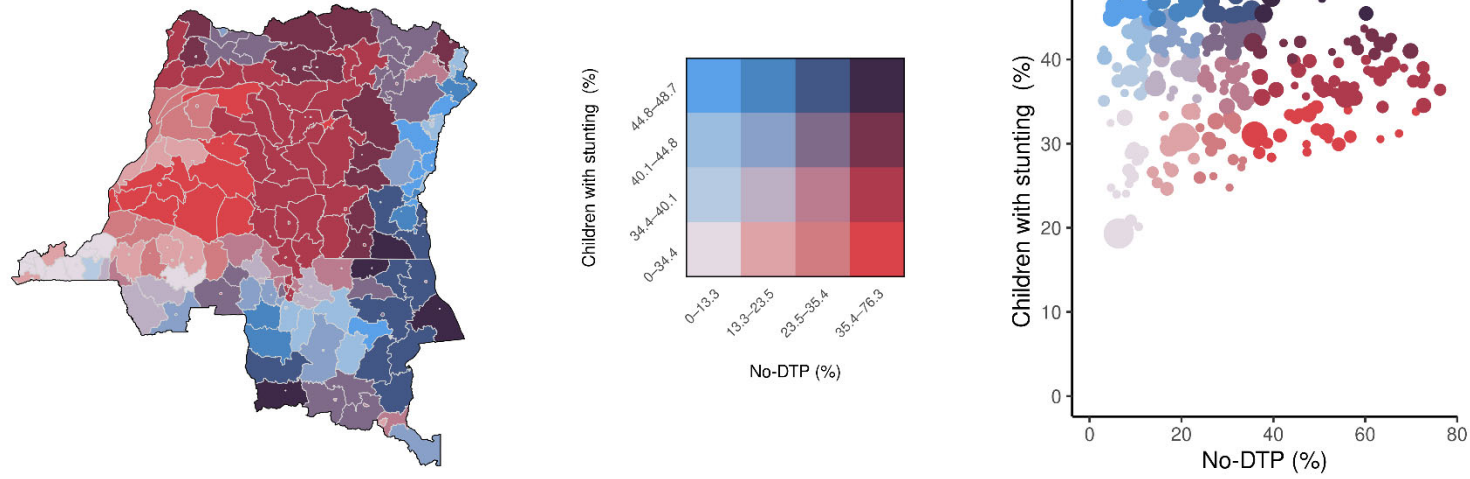

(B) No-DTP and children with stunting quartiles (counts): D.R.C.

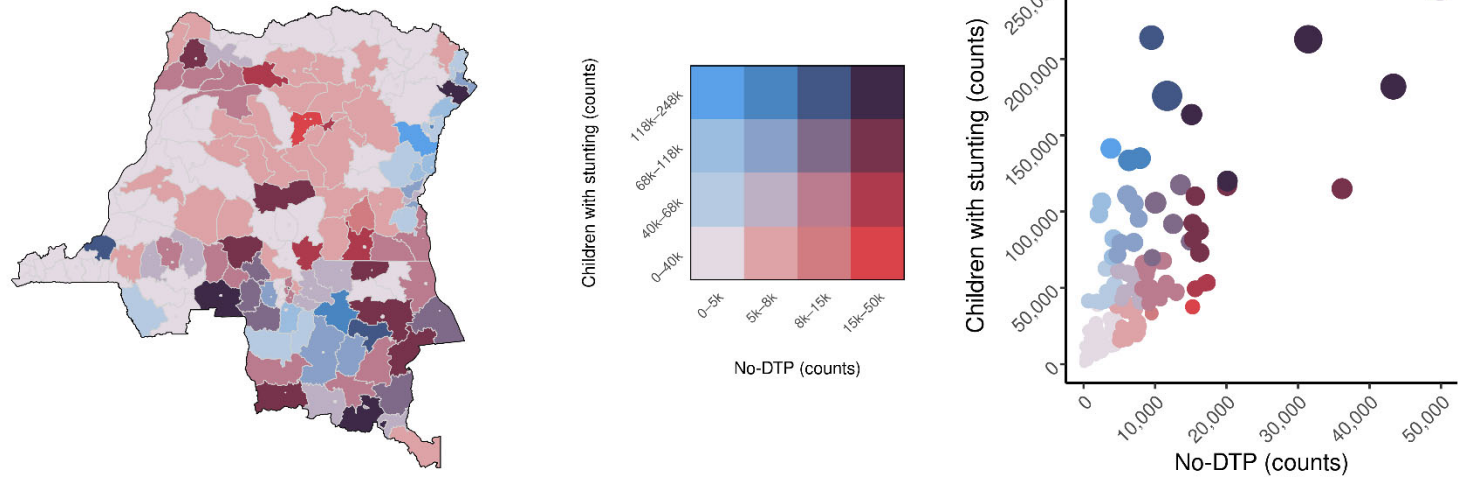

# Supplemental Figure S34: DRC, U5M

(A) No-DTP and under-5 mortality quartiles (%): D.R.C.

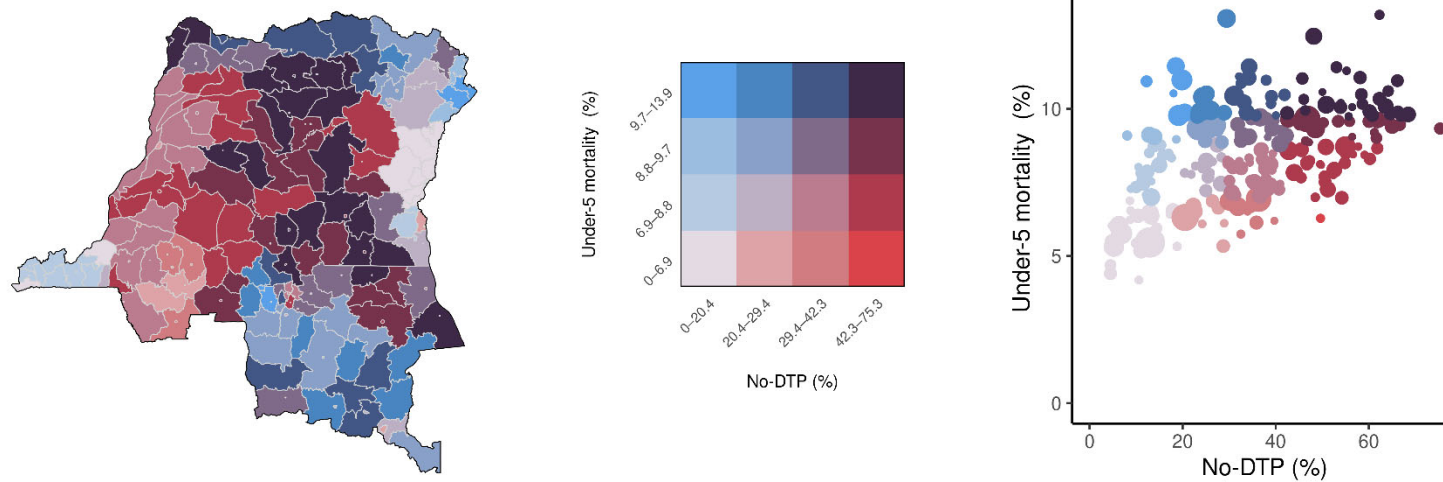

(B) No-DTP and under-5 mortality quartiles (counts): D.R.C.

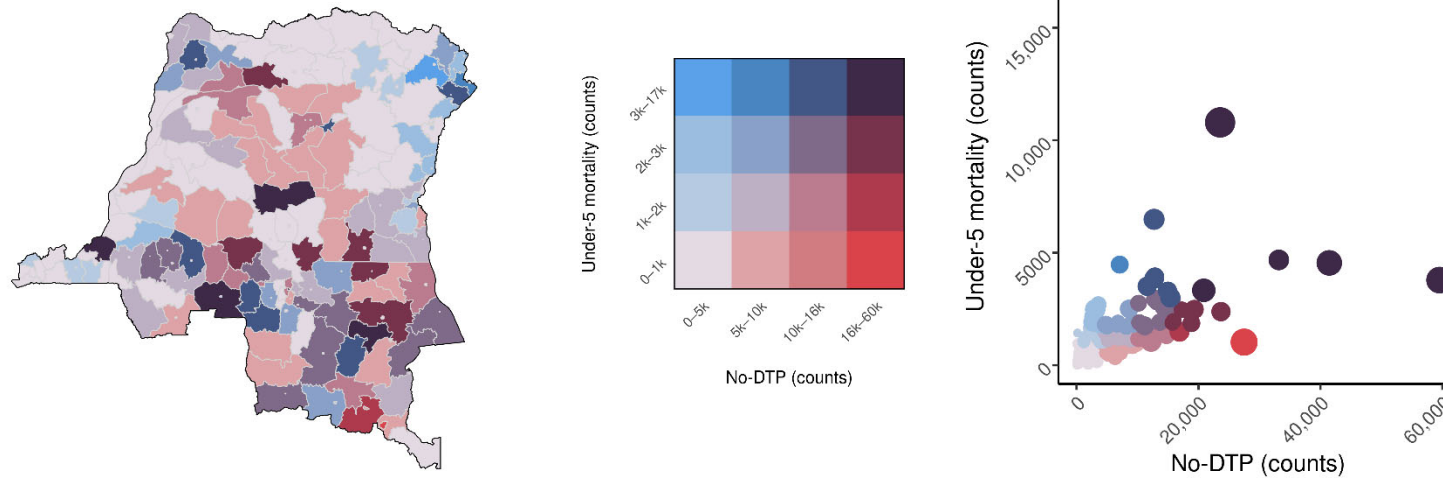

## Supplemental Figure S35: DRC, missed ITNs

(A) No-DTP and missed ITNs quartiles (%): D.R.C.

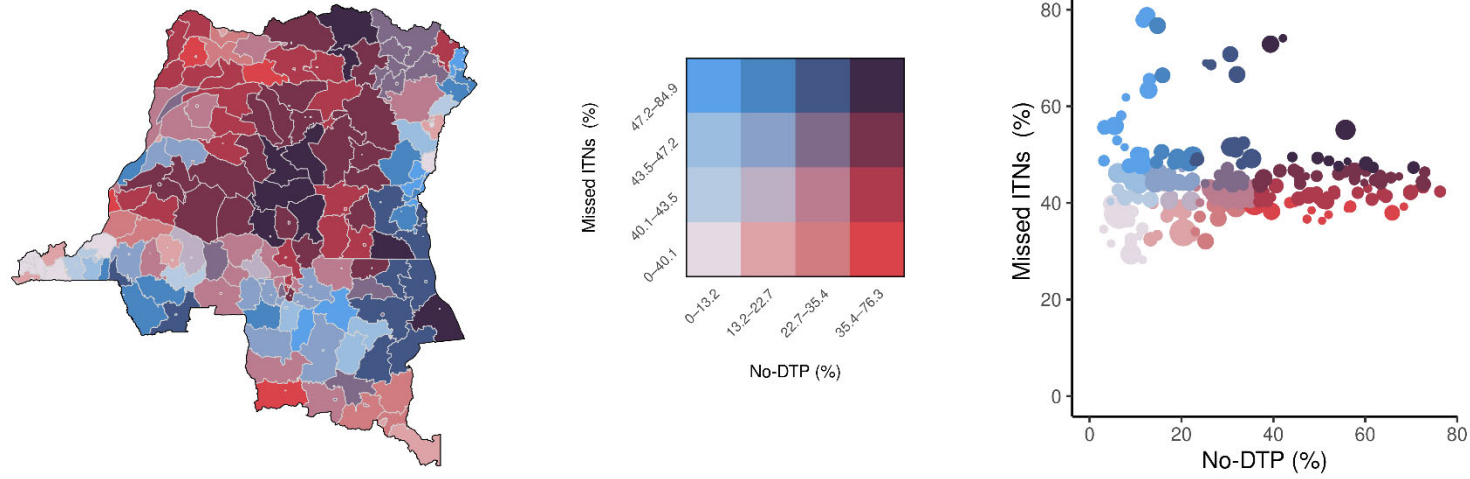

(B) No-DTP and missed ITNs quartiles (counts): D.R.C.

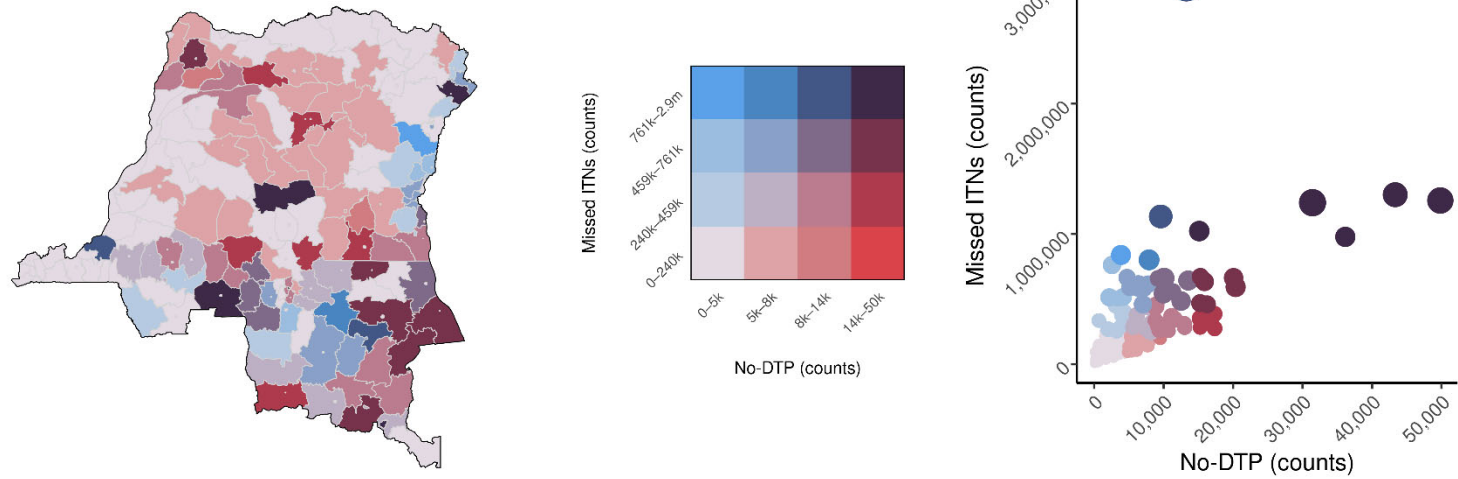

## Supplemental Figure S36: DRC, missed ORT

(A) No-DTP and missed ORT quartiles (%): D.R.C.

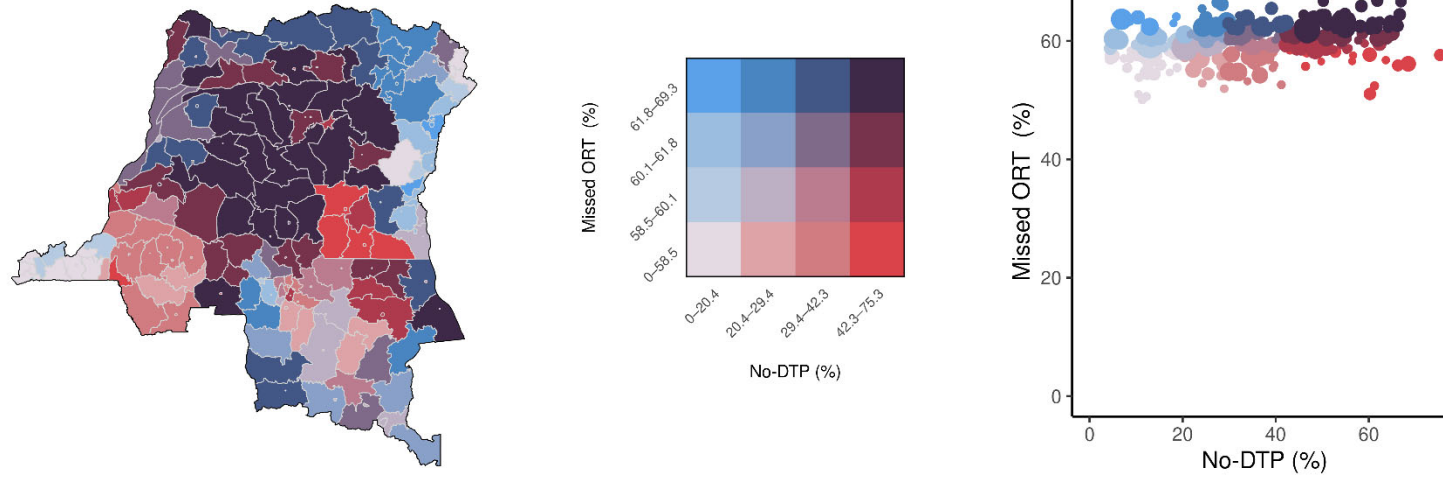

(B) No-DTP and missed ORT quartiles (counts): D.R.C.

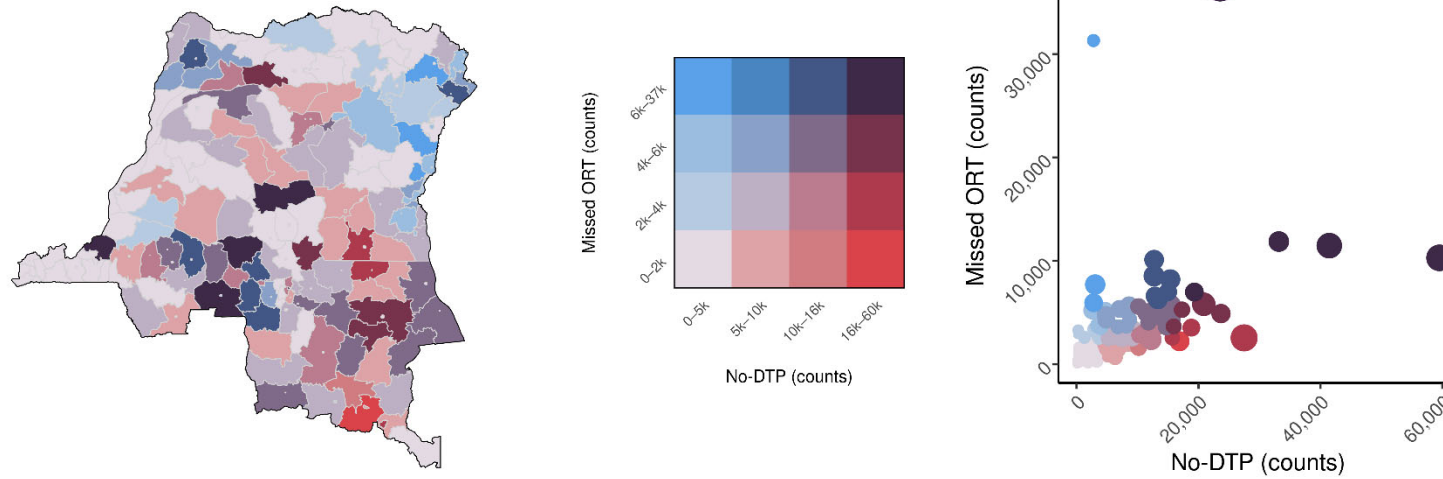

# Supplemental Figure S37: DRC, LF

(A) No-DTP and LF quartiles (%): D.R.C.

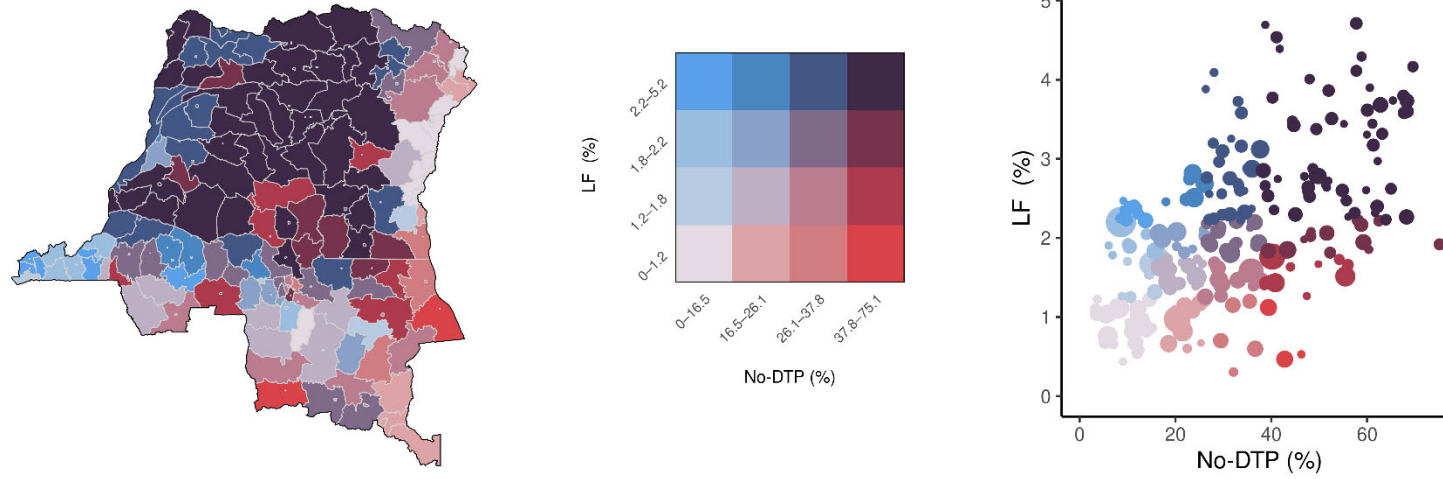

(B) No-DTP and LF quartiles (counts): D.R.C.

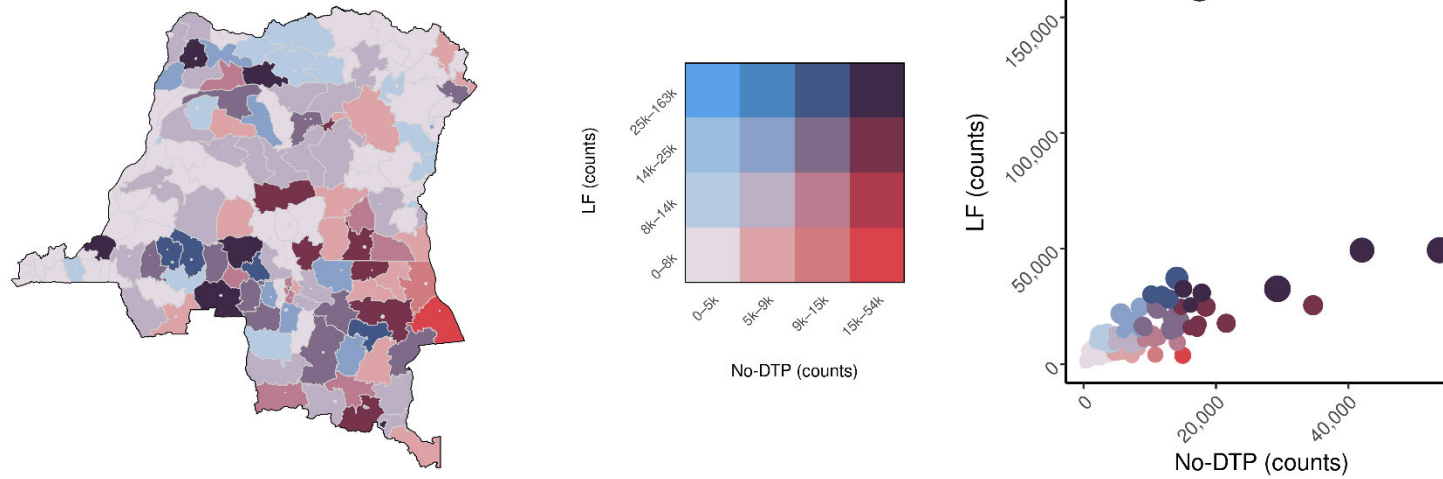

## Supplemental Figure S38: Ethiopia, stunting

(A) No-DTP and children with stunting quartiles (%): Ethiopia

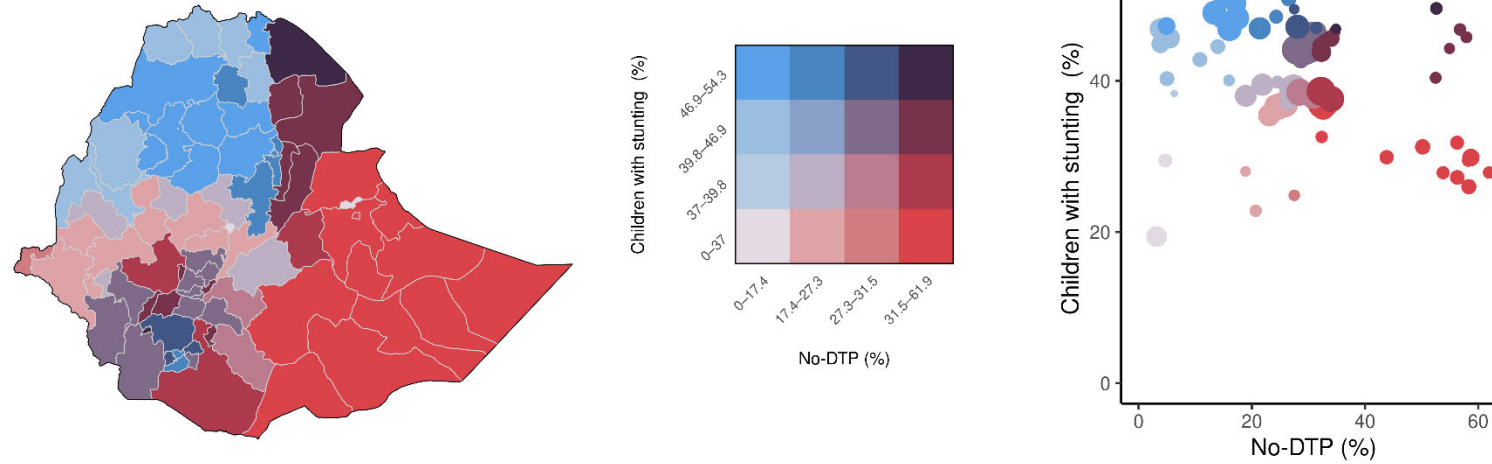

(B) No-DTP and children with stunting quartiles (counts): Ethiopia

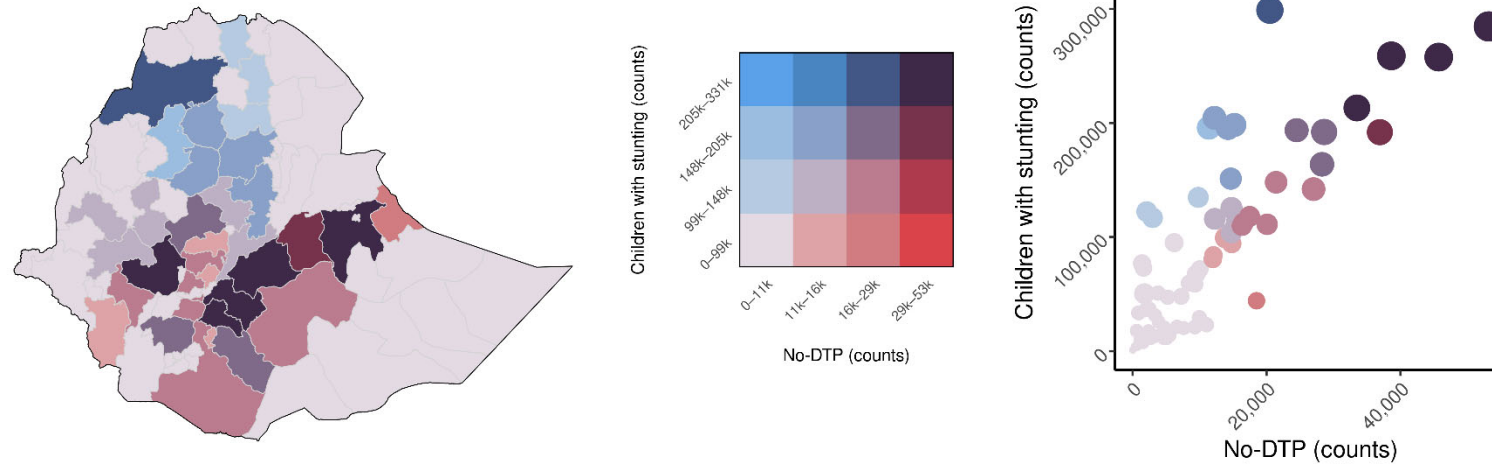

## Supplemental Figure S39: Ethiopia, U5M

(A) No-DTP and under-5 mortality quartiles (%): Ethiopia

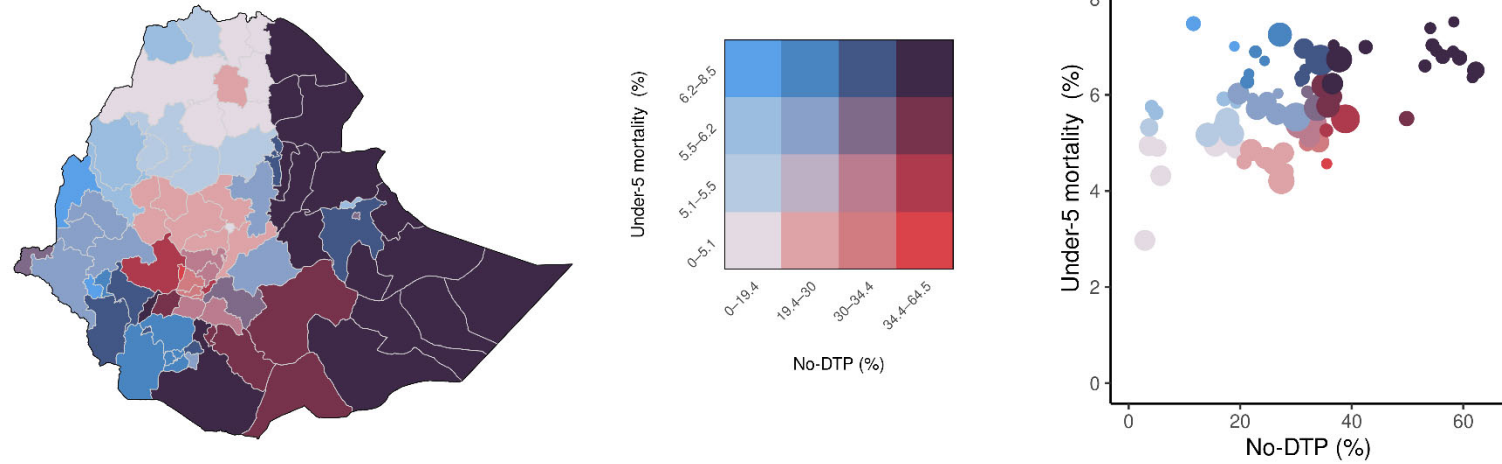

(B) No-DTP and under-5 mortality quartiles (counts): Ethiopia

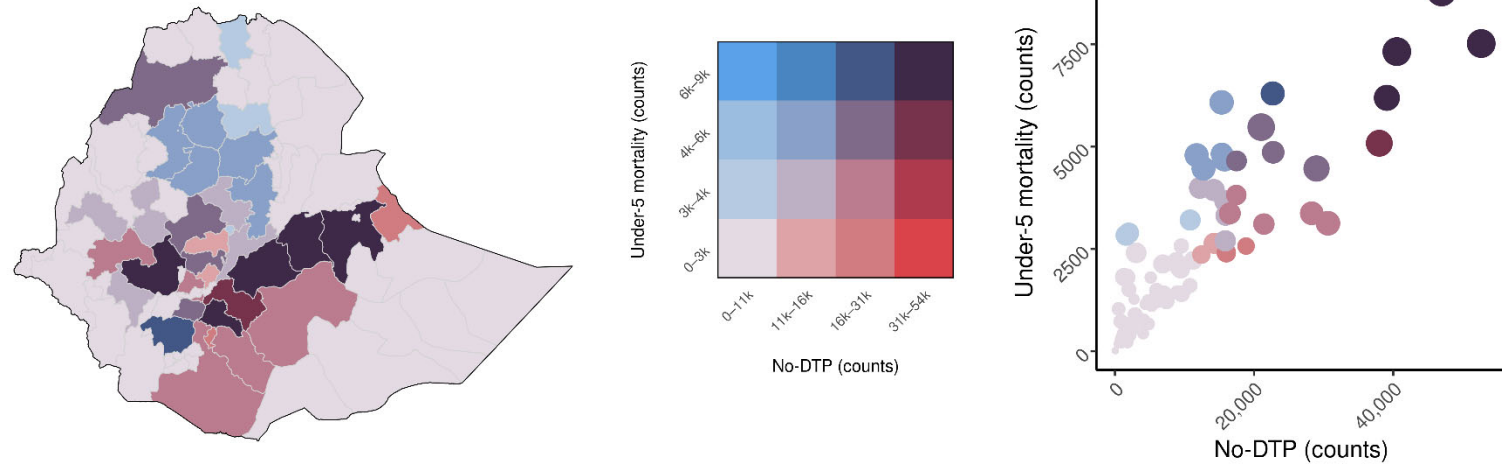

## Supplemental Figure S40: Ethiopia, missed ITNs

(A) No-DTP and missed ITNs quartiles (%): Ethiopia

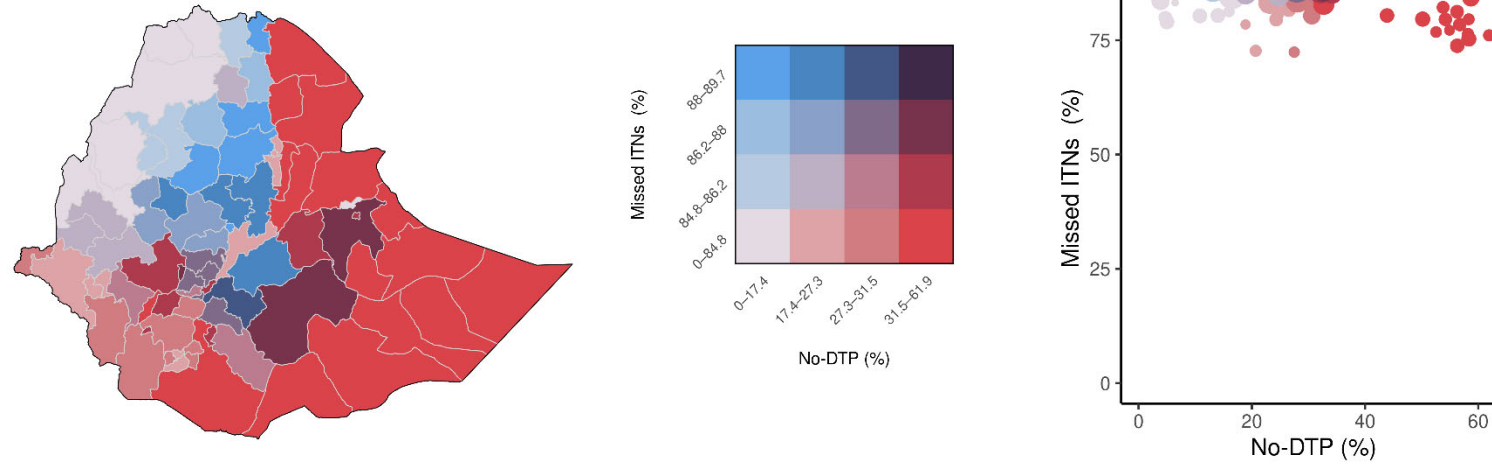

(B) No-DTP and missed ITNs quartiles (counts): Ethiopia

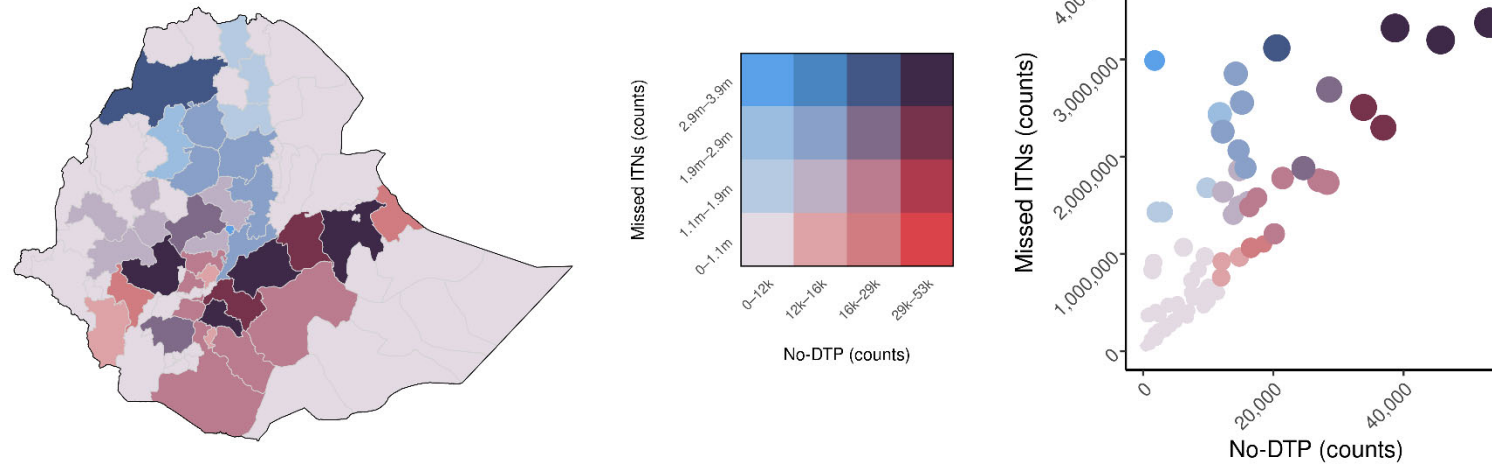

## Supplemental Figure S41: Ethiopia, missed ORT

(A) No-DTP and missed ORT quartiles (%): Ethiopia

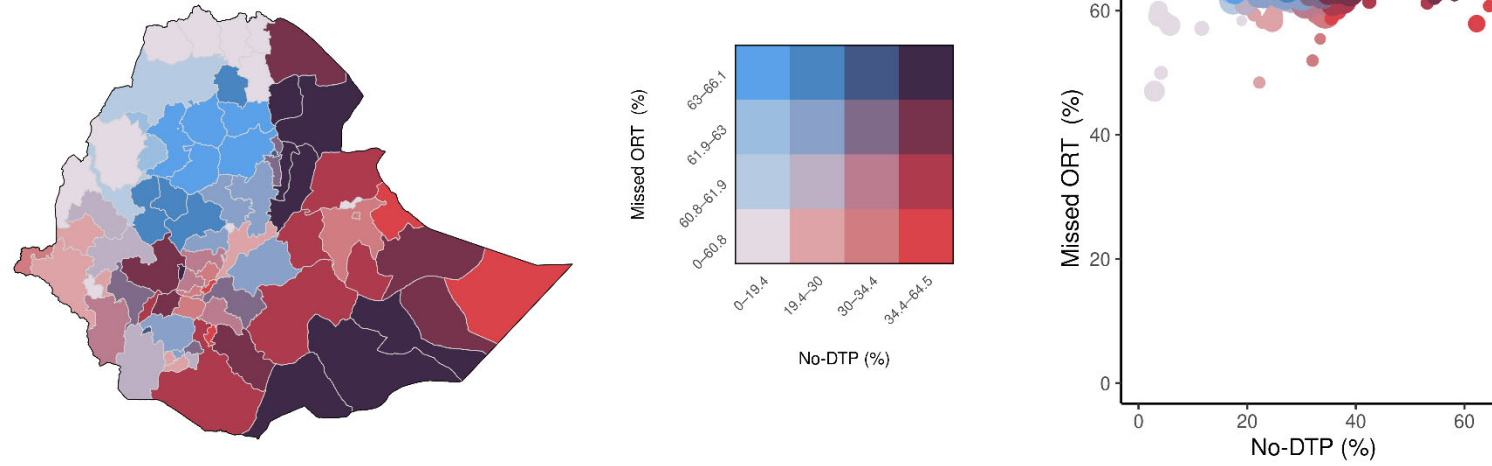

(B) No-DTP and missed ORT quartiles (counts): Ethiopia

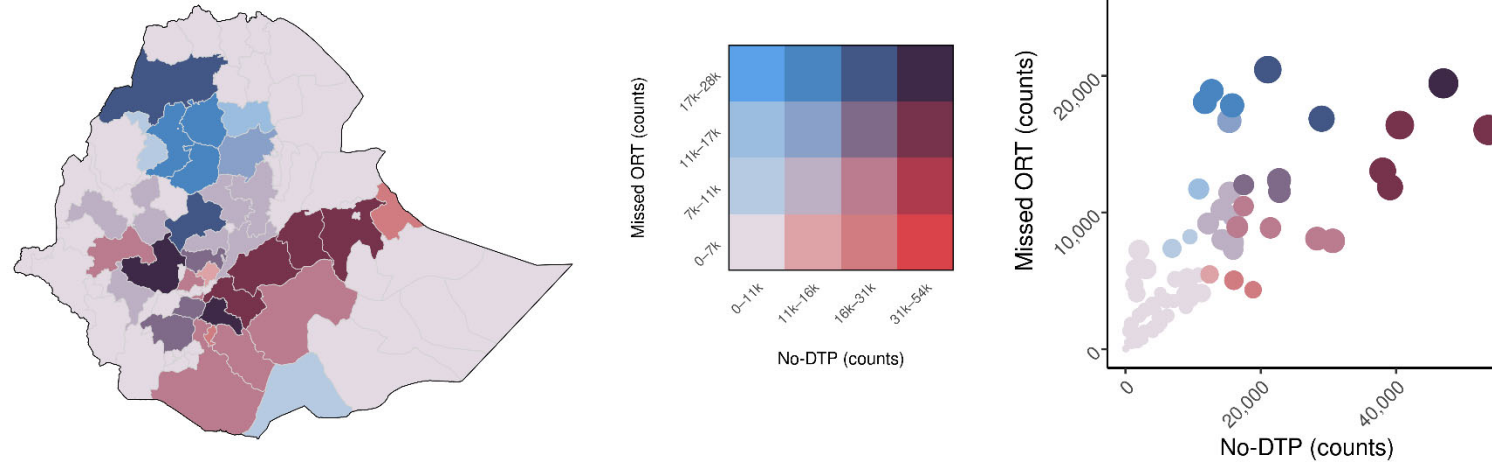

## Supplemental Figure S42: Ethiopia, LF

(A) No-DTP and LF quartiles (%): Ethiopia

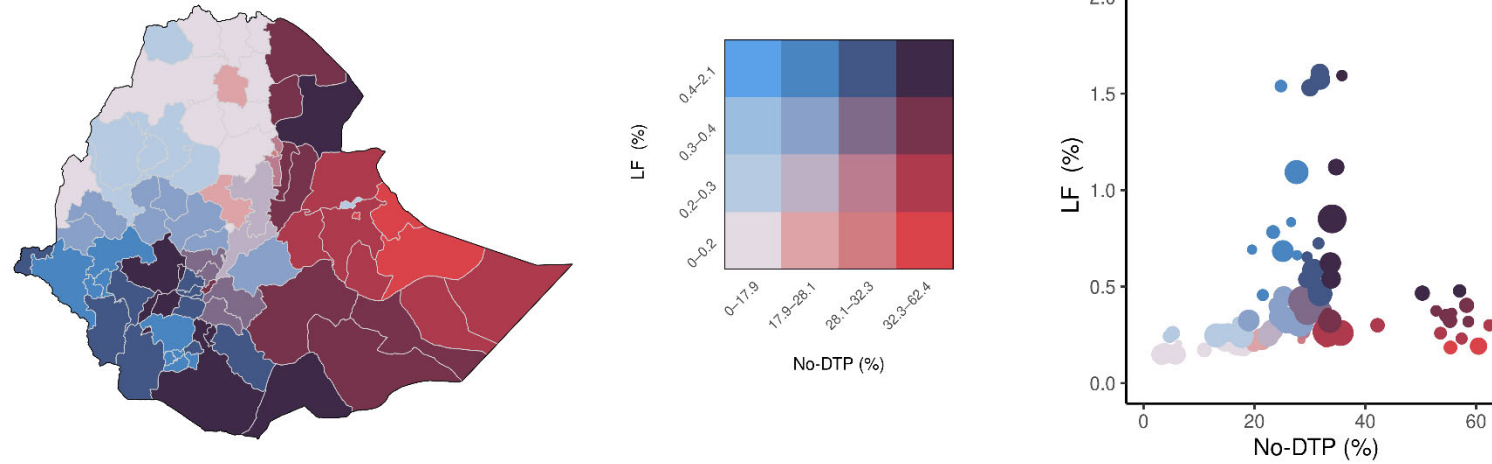

(B) No-DTP and LF quartiles (counts): Ethiopia

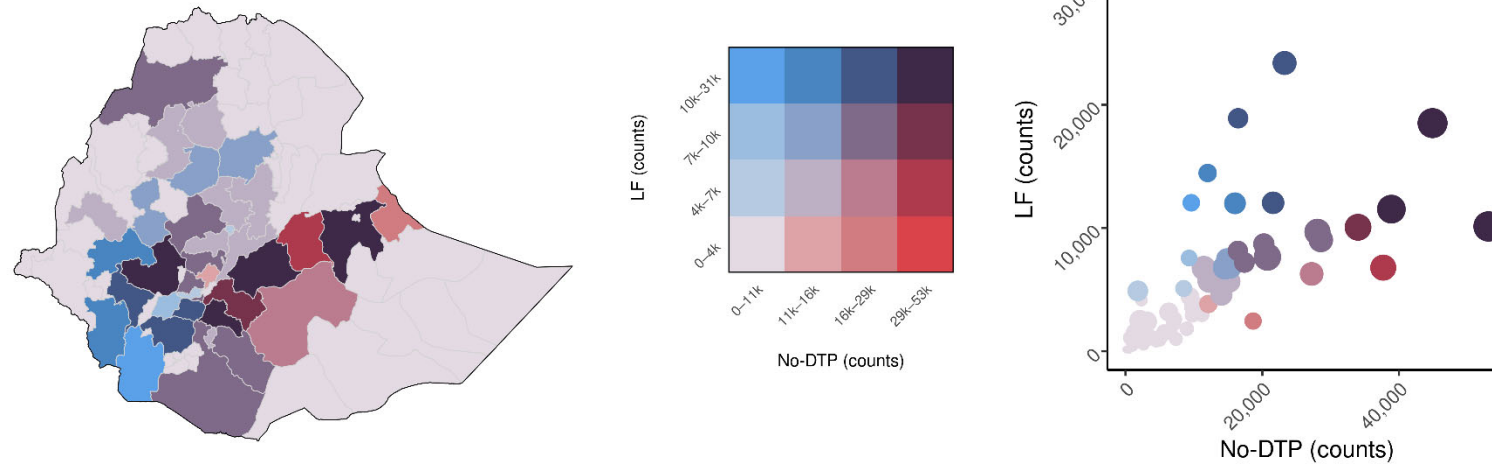

# Supplemental Figure S43: Indonesia, stunting

(A) No-DTP and children with stunting quartiles (%): Indonesia

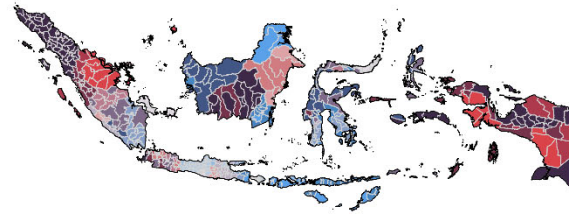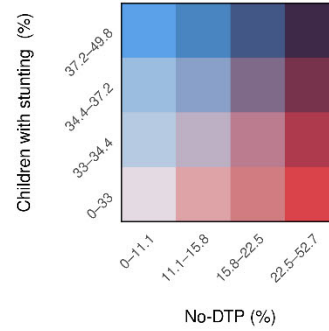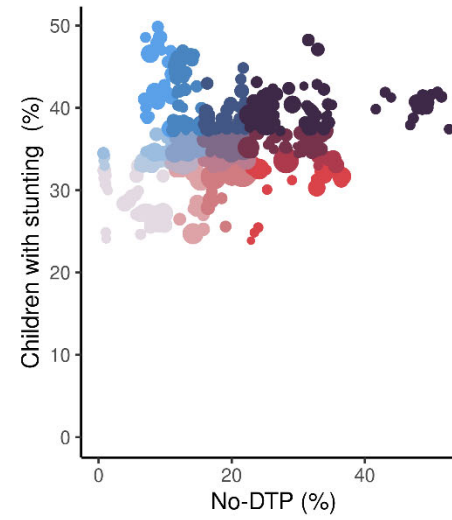

(B) No-DTP and children with stunting quartiles (counts): Indonesia

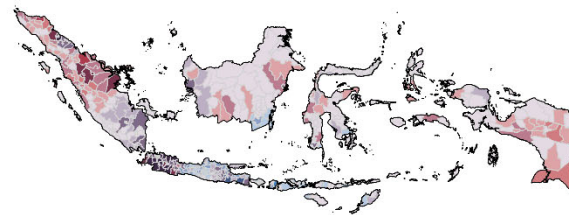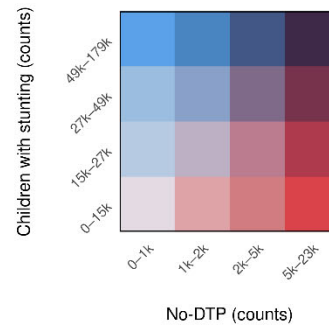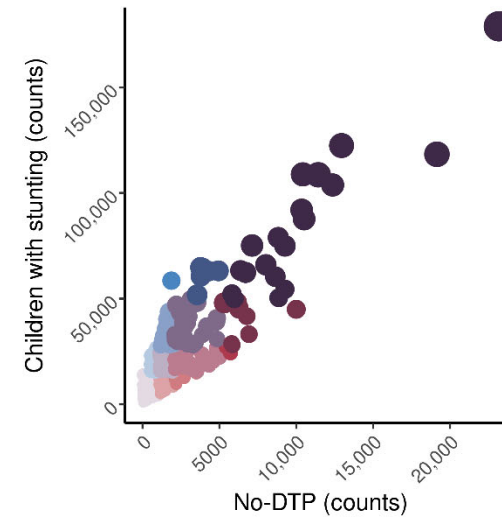

# Supplemental Figure S44: Indonesia, U5M

(A) No-DTP and under-5 mortality quartiles (%): Indonesia

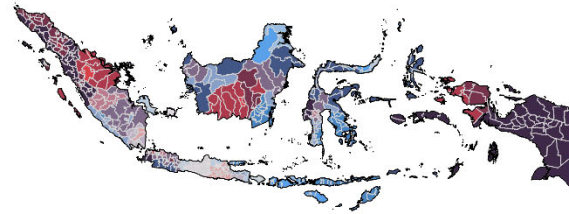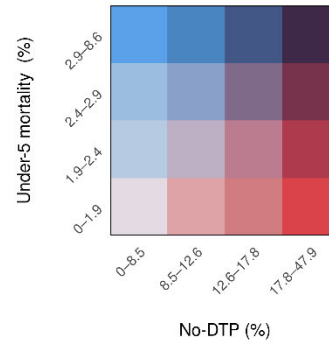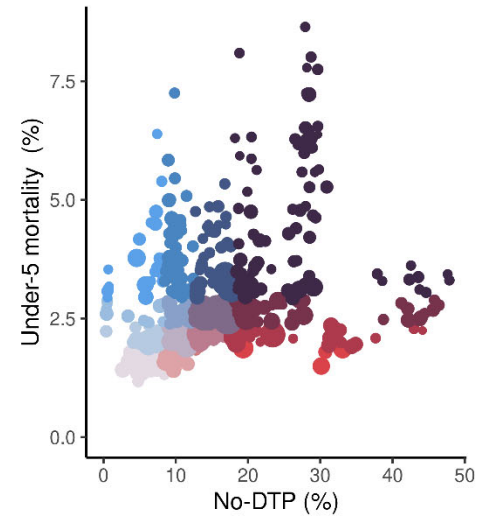

(B) No-DTP and under-5 mortality quartiles (counts): Indonesia

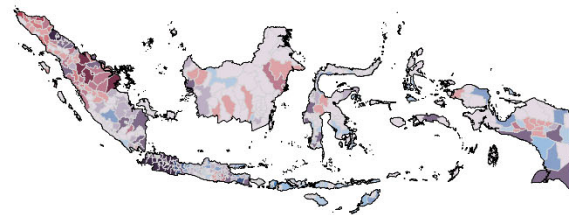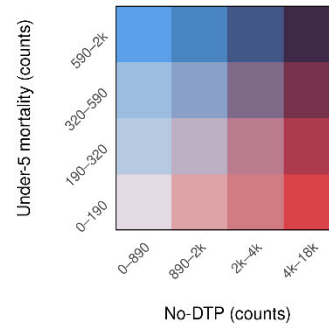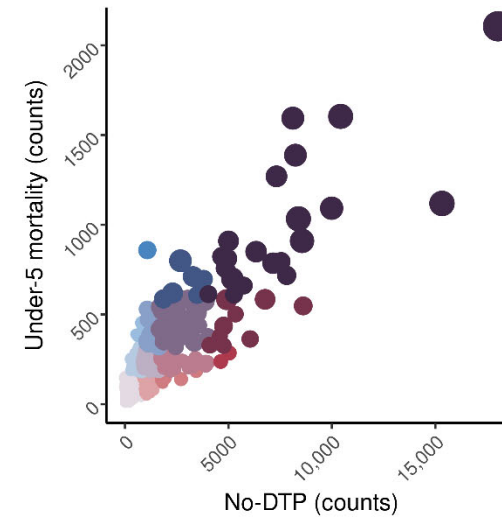

# Supplemental Figure S45: Indonesia, missed ORT

(A) No-DTP and missed ORT quartiles (%): Indonesia

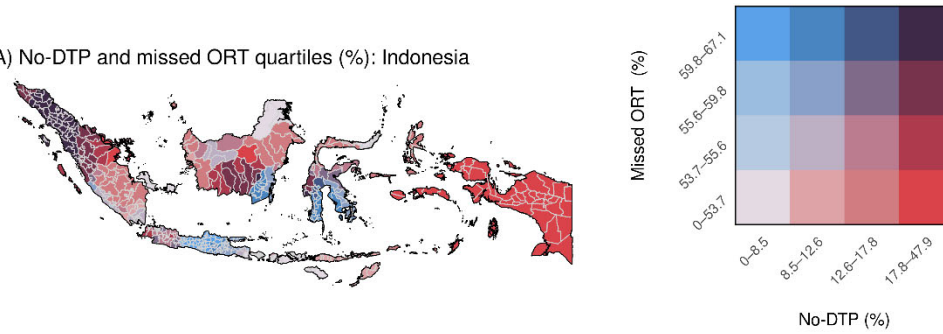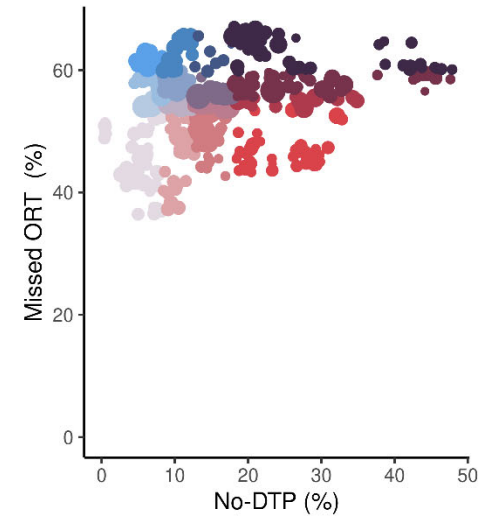

(B) No-DTP and missed ORT quartiles (counts): Indonesia

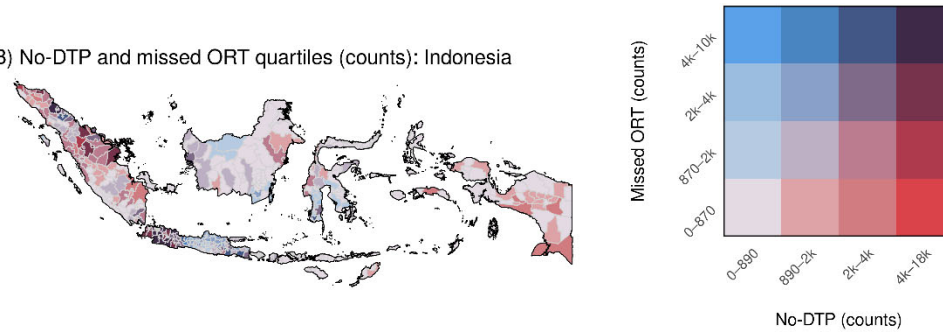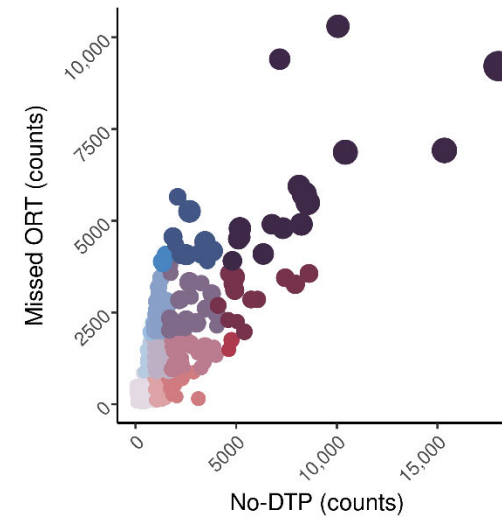

# Supplemental Figure S46: Indonesia, LF

(A) No-DTP and LF quartiles (%): Indonesia

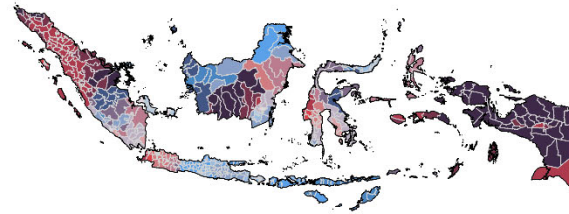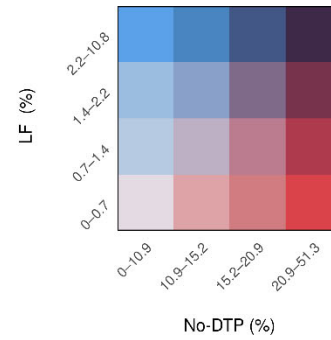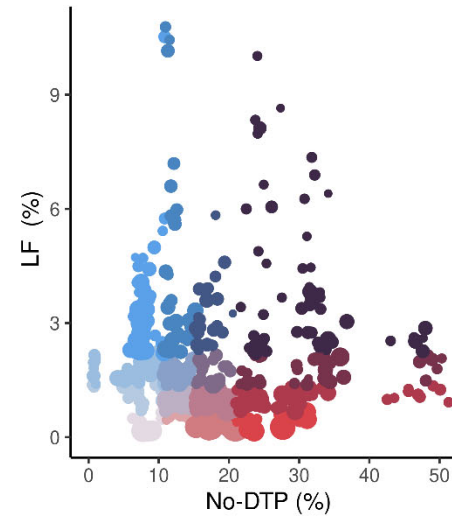

(B) No-DTP and LF quartiles (counts): Indonesia

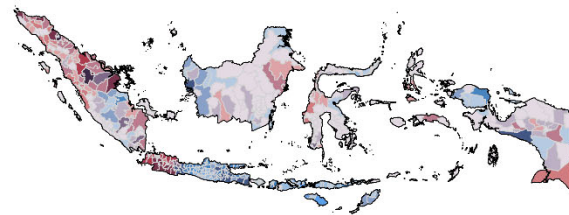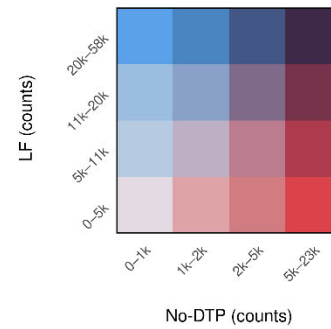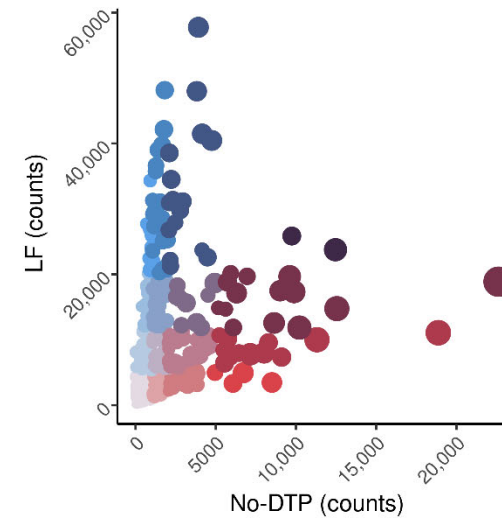

*Supplemental Figures S47–S69: Country-specific, highest quartile overlap.*

Country-specific overlap between no-DTP and each indicator (children with stunting, U5M, missed ITNs, missed ORT, LF), for each country (Nigeria, Angola, DRC, Ethiopia and Indonesia), for the highest quartiles only. Districts in red are in the highest quartile for no-DTP only, blue are in the highest quartile for the comparator indicator only, and purple are in the highest quartile for both indicators. The map on the left (a) shows categorization based on prevalence, and the map on the right (b) shows categorization based on counts.

**Supplemental Figure S47: Nigeria, U5M**

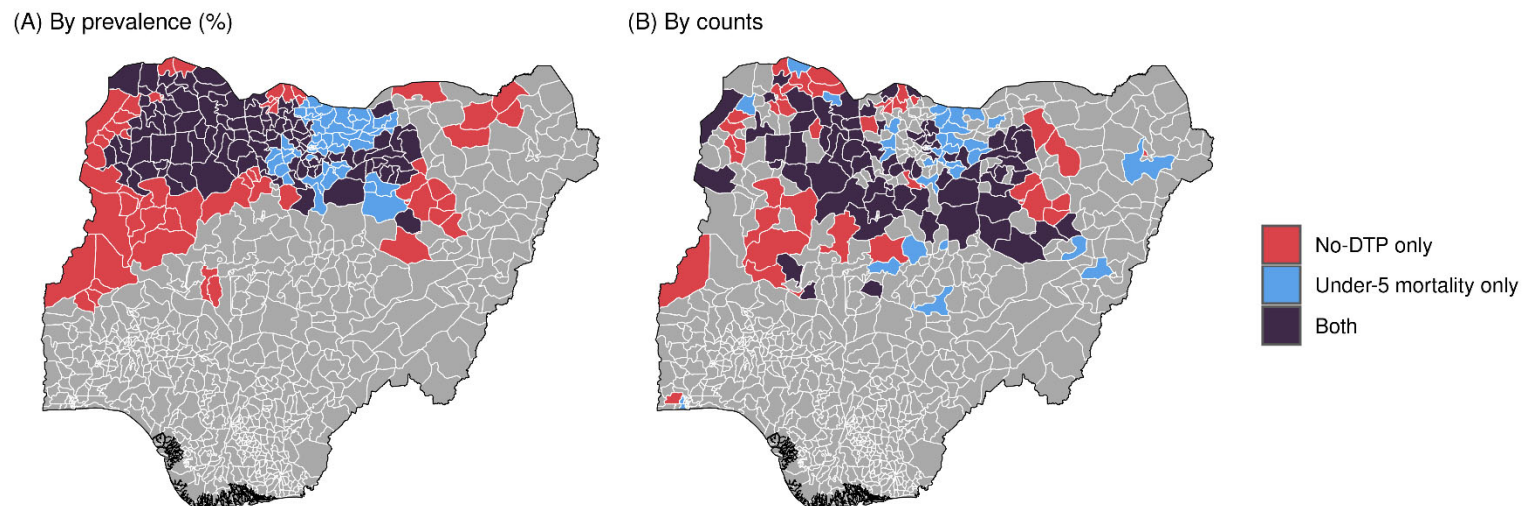

# Supplemental Figure S48: Nigeria, missed ITNs

(A) By prevalence (%)

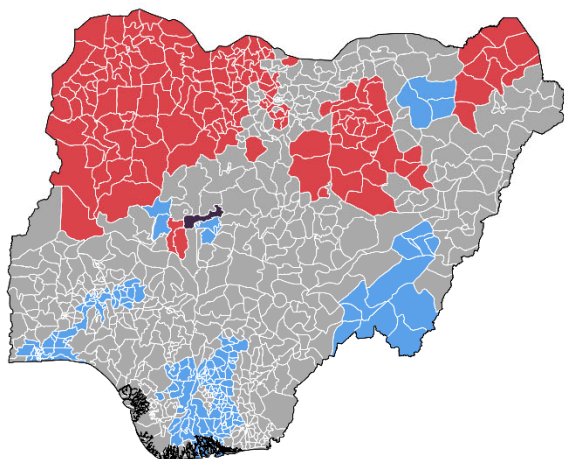

(B) By counts

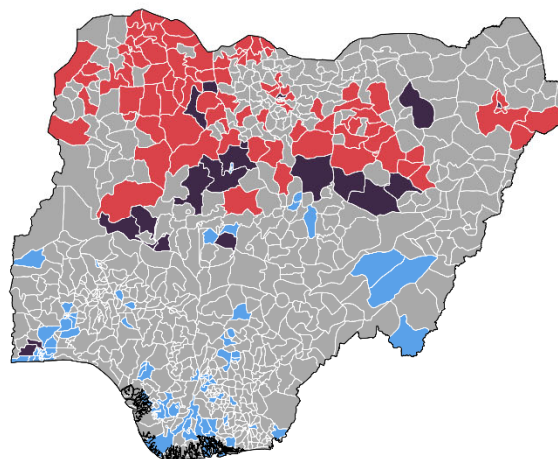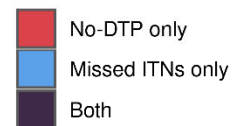

## Supplemental Figure S49: Nigeria, missed ORT

(A) By prevalence (%)

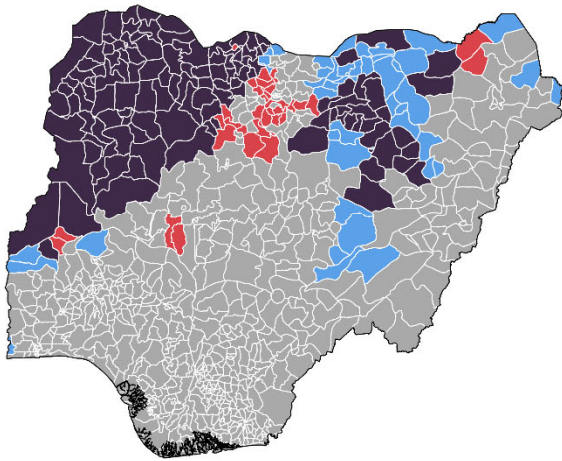

(B) By counts

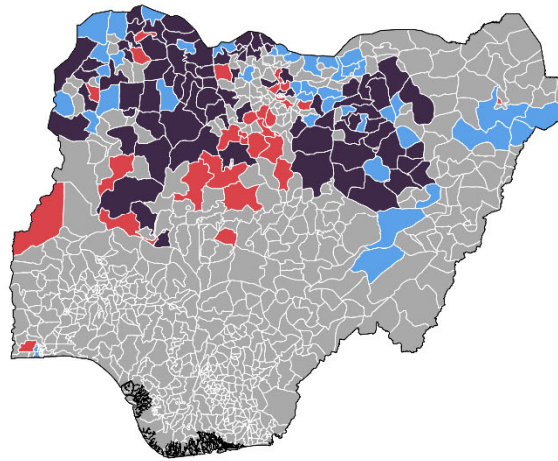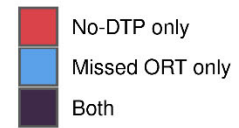

## Supplemental Figure S50: Nigeria, LF

(A) By prevalence (%)

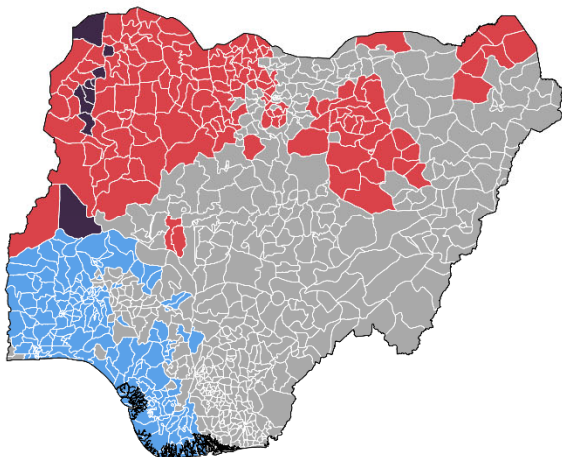

(B) By counts

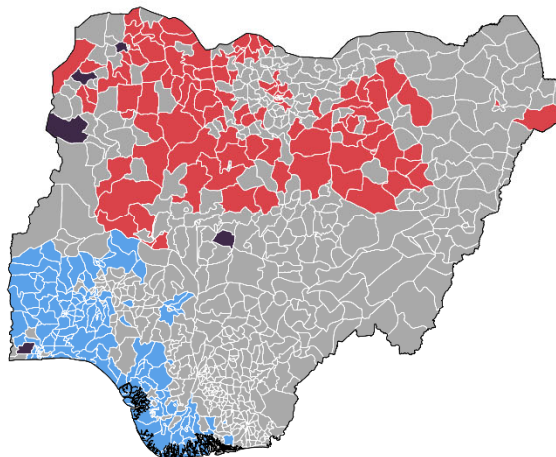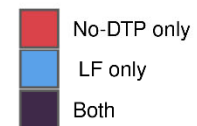

## Supplemental Figure S51: Angola, stunting

(A) By prevalence (%)

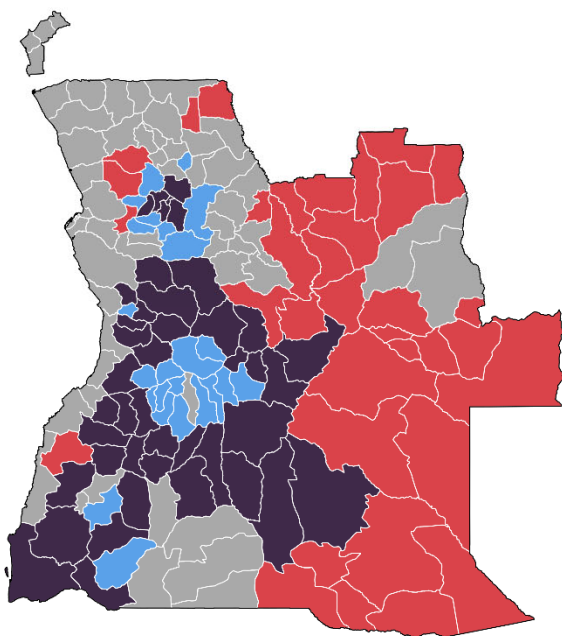

(B) By counts

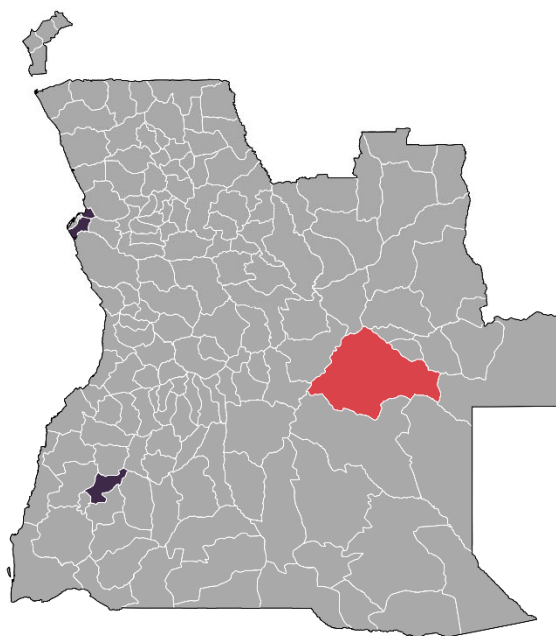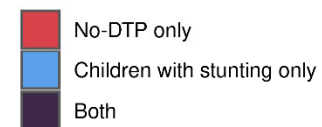

## Supplemental Figure S52: Angola, U5M

(A) By prevalence (%)

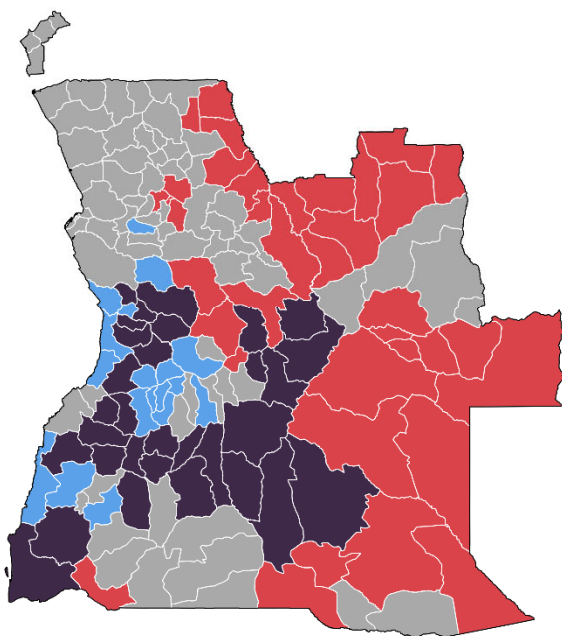

(B) By counts

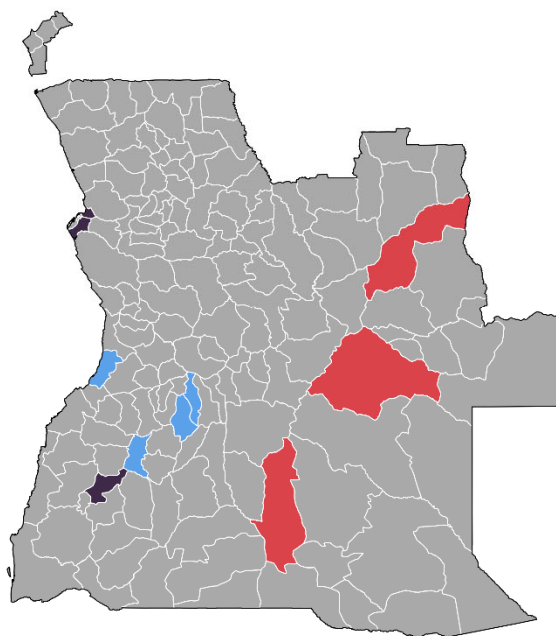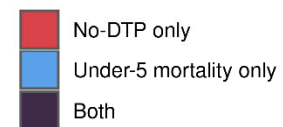

**Supplemental Figure S53: Angola, missed ITNs**

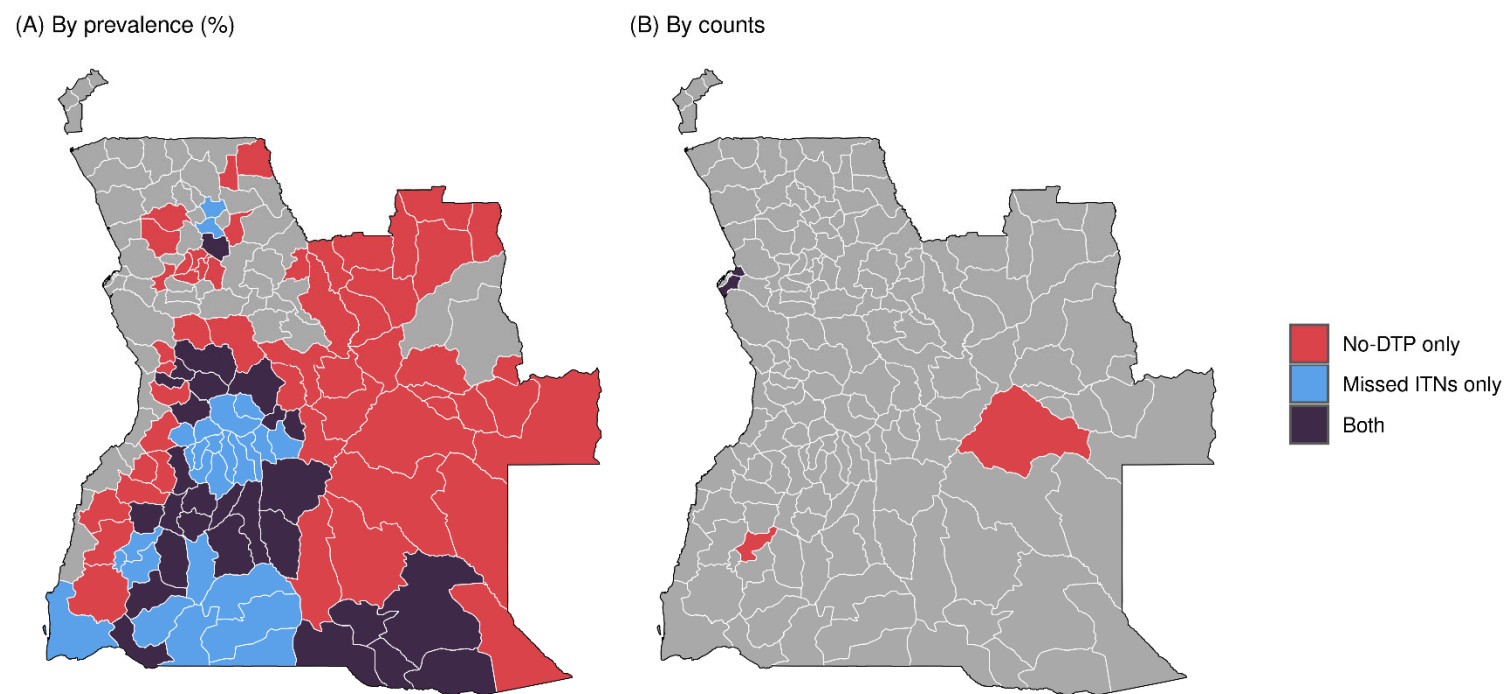

# Supplemental Figure S54: Angola, missed ORT

(A) By prevalence (%)

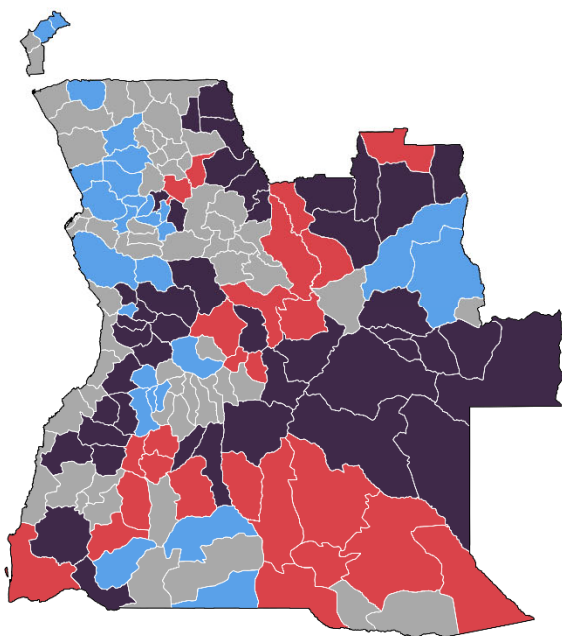

(B) By counts

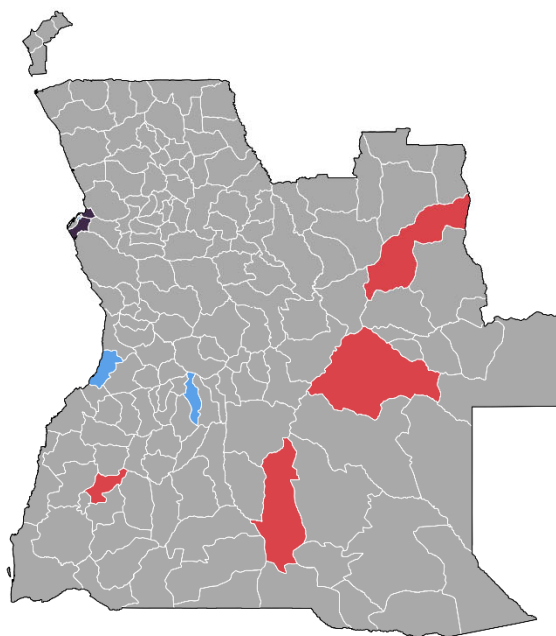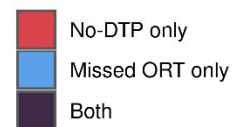

# Supplemental Figure S55: Angola, LF

(A) By prevalence (%)

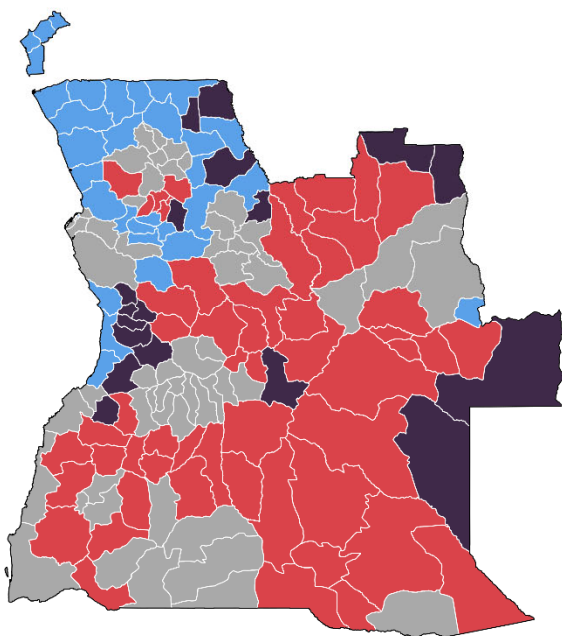

(B) By counts

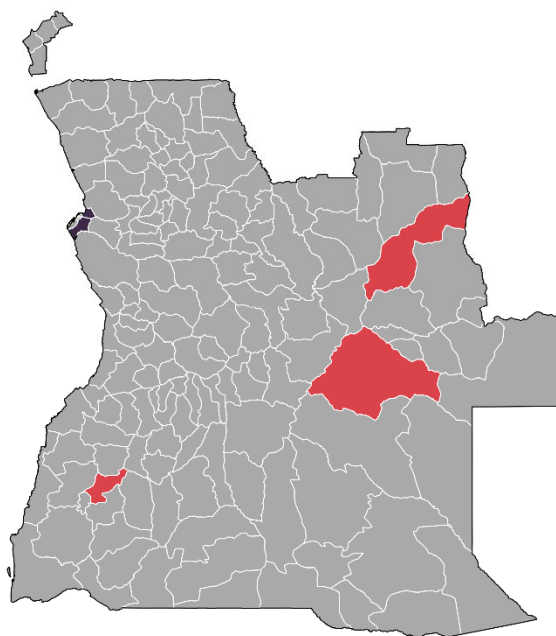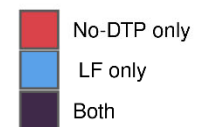

## Supplemental Figure S56: DRC, stunting

(A) By prevalence (%)

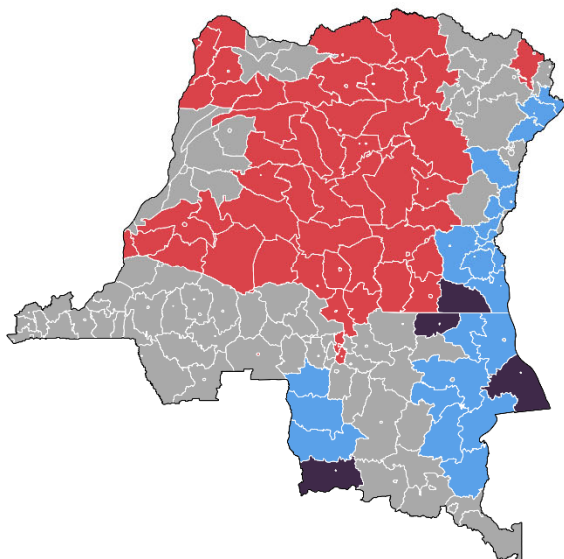

(B) By counts

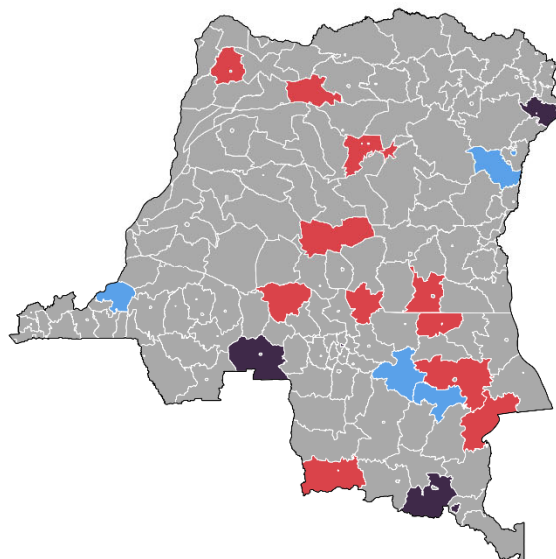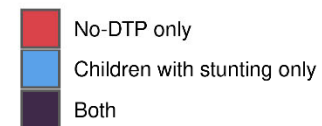

## Supplemental Figure S57: DRC, U5M

(A) By prevalence (%)

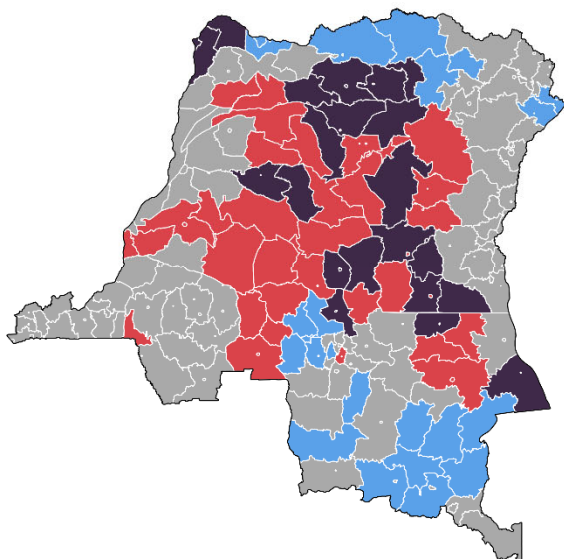

(B) By counts

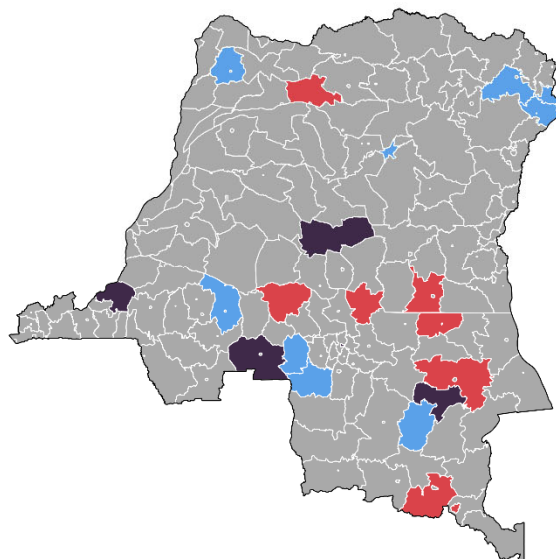

## Supplemental Figure S58: DRC, missed ITNs

(A) By prevalence (%)

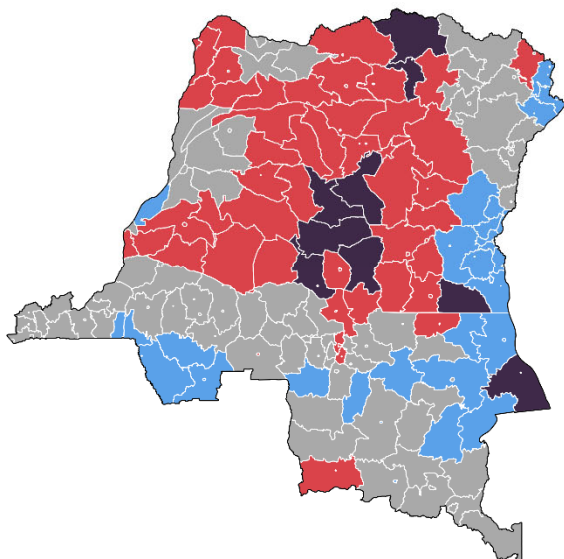

(B) By counts

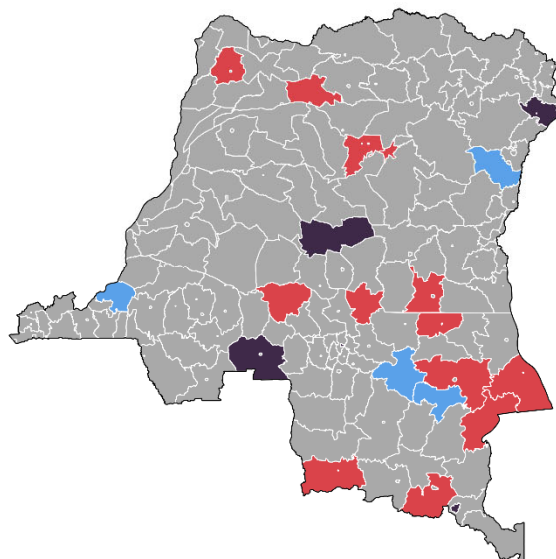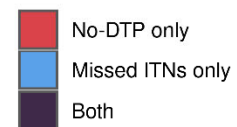

## Supplemental Figure S59: DRC, missed ORT

(A) By prevalence (%)

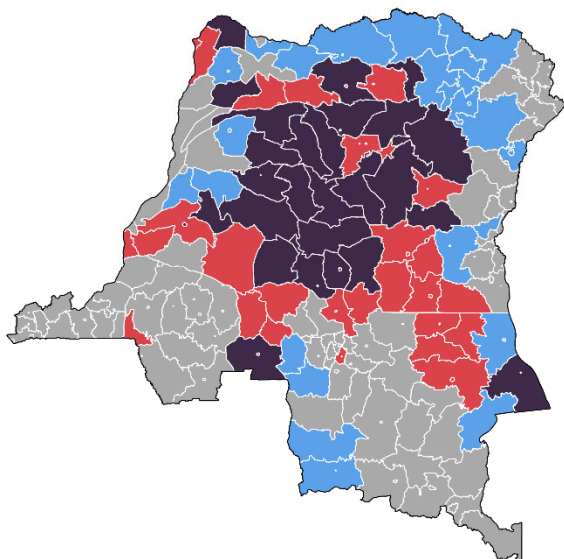

(B) By counts

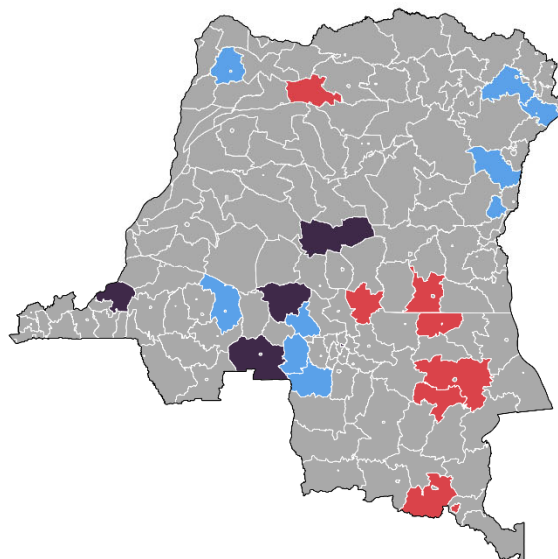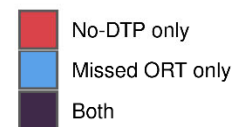

## Supplemental Figure S60: DRC, LF

(A) By prevalence (%)

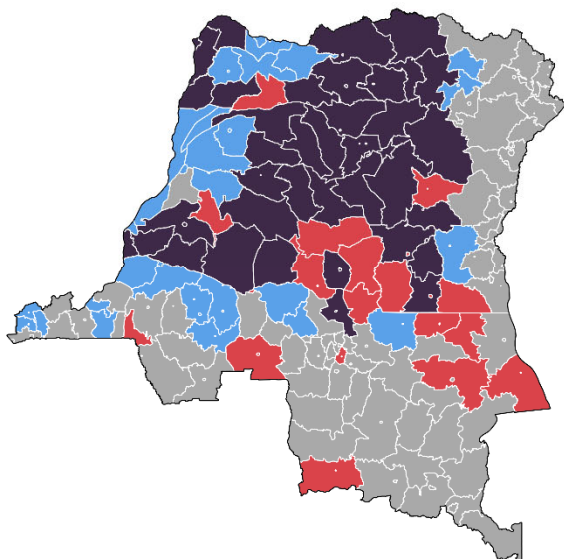

(B) By counts

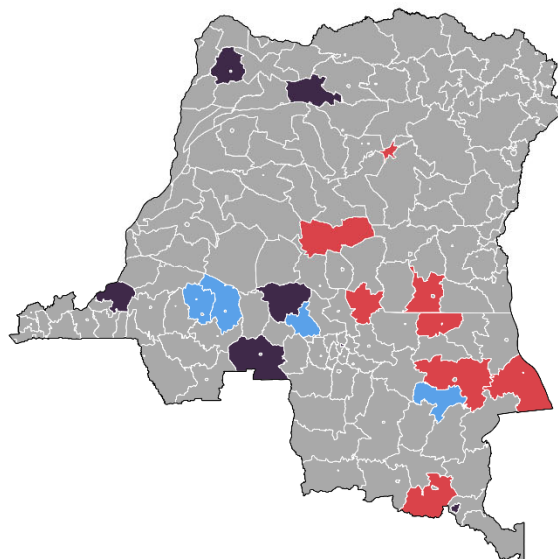

## Supplemental Figure S61: Ethiopia, stunting

(A) By prevalence (%)

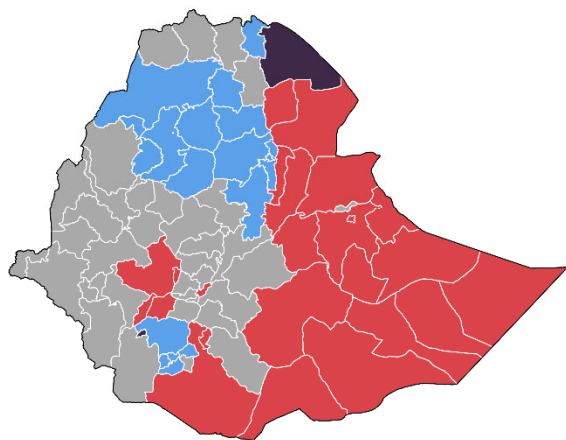

(B) By counts

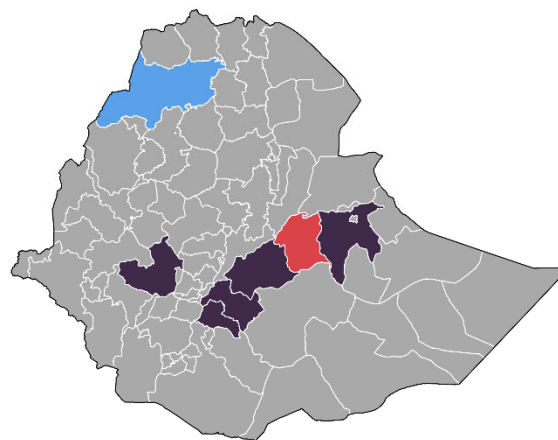

## Supplemental Figure S62: Ethiopia, U5M

(A) By prevalence (%)

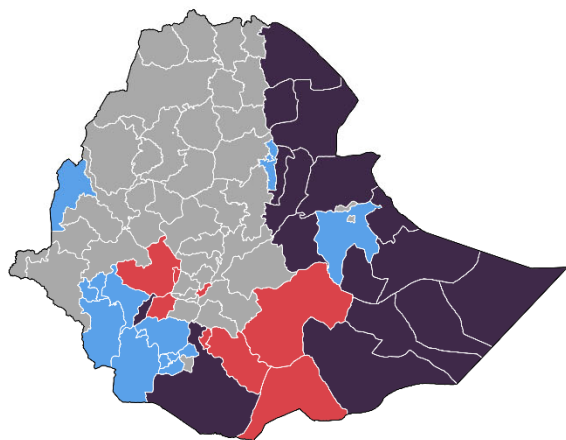

(B) By counts

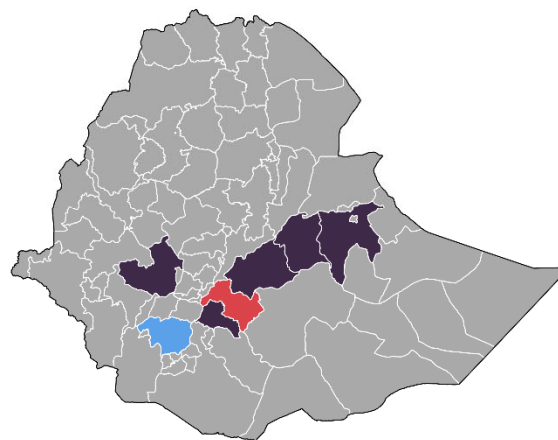

### Supplemental Figure S63: Ethiopia, missed ITNs

(A) By prevalence (%)

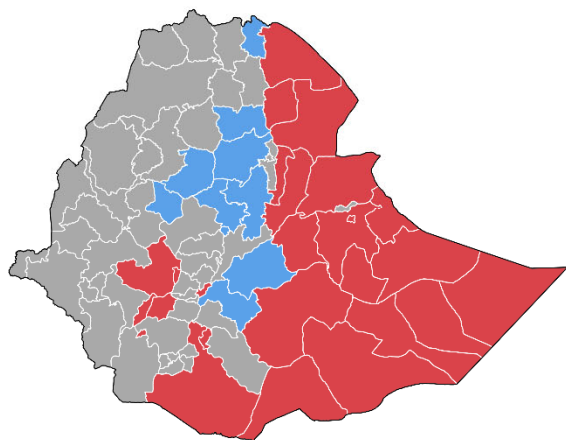

(B) By counts

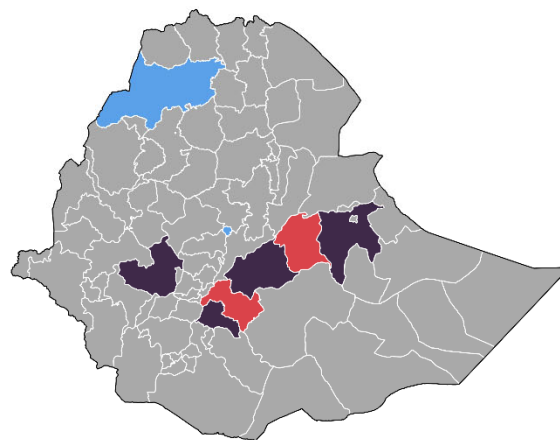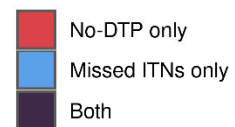

# Supplemental Figure S64: Ethiopia, missed ORT

(A) By prevalence (%)

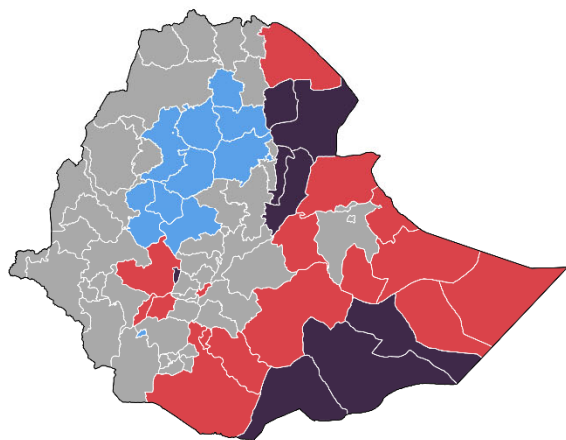

(B) By counts

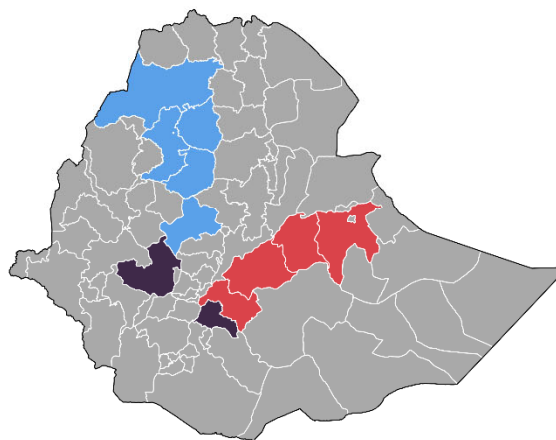

## Supplemental Figure S65: Ethiopia, LF

(A) By prevalence (%)

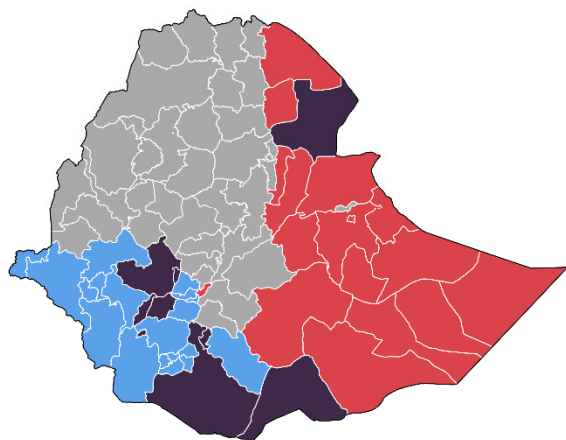

(B) By counts

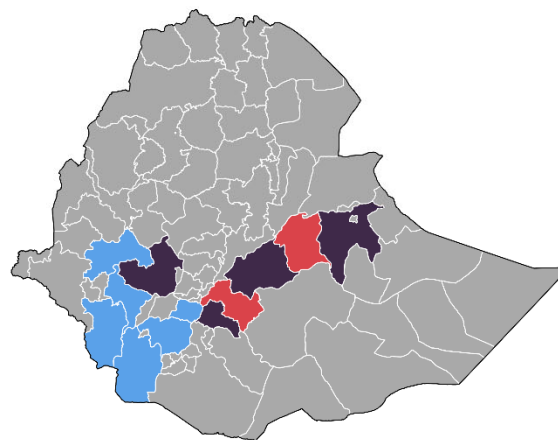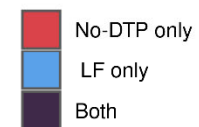

## Supplemental Figure S66: Indonesia, stunting

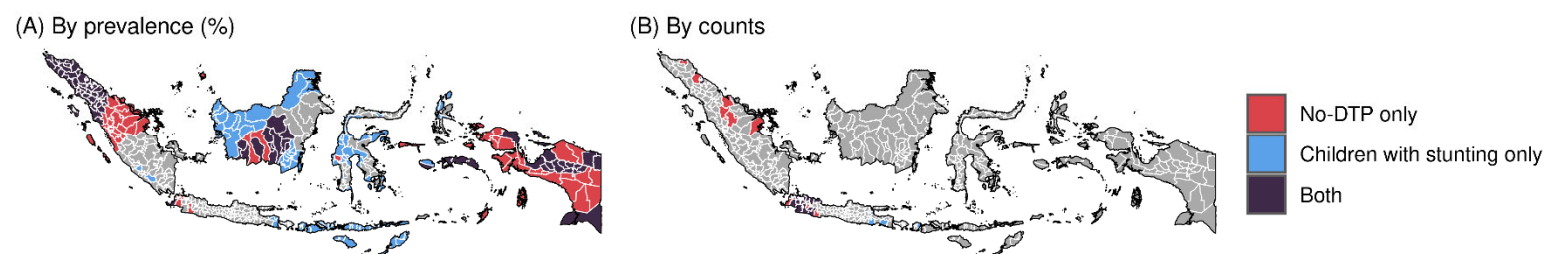

# Supplemental Figure S67: Indonesia, U5M

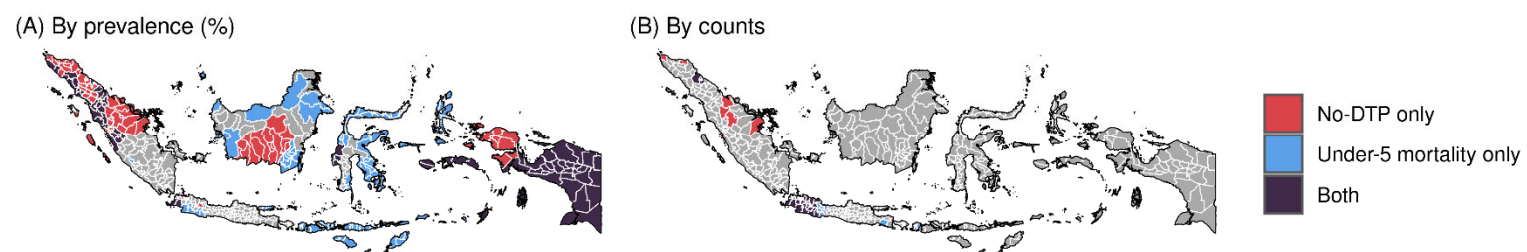

# Supplemental Figure S68: Indonesia, missed ORT

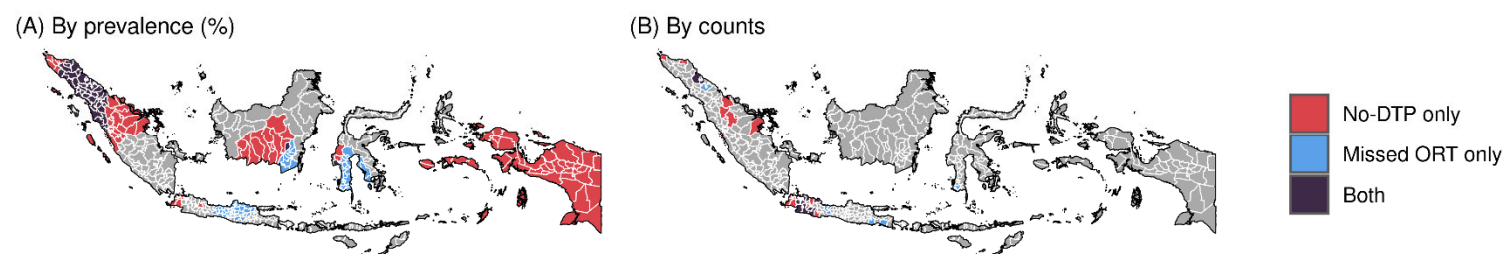

# Supplemental Figure S69: Indonesia, LF

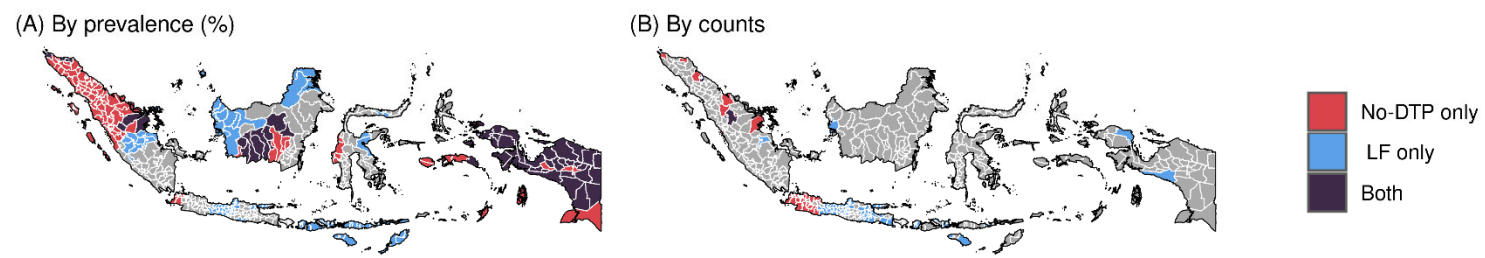

*Supplemental Figures S70–S73: Multi-indicator overlap of country-specific highest quartiles.*

For each country (Angola, DRC, Ethiopia and Indonesia), color given in each district indicates the number of indicators designated in the highest quartile in that district. Districts outlined in white indicate those where no-DTP is among the indicators in the highest quartile. The map on the left (a) shows categorization based on prevalence, and the map on the right (b) shows categorization based on counts.

**Supplemental Figure S70: Angola**

(A) By prevalence

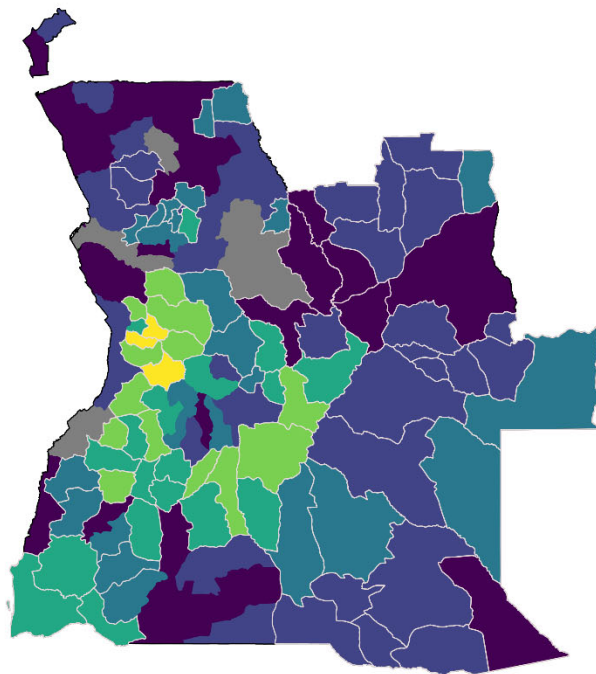

(B) By counts

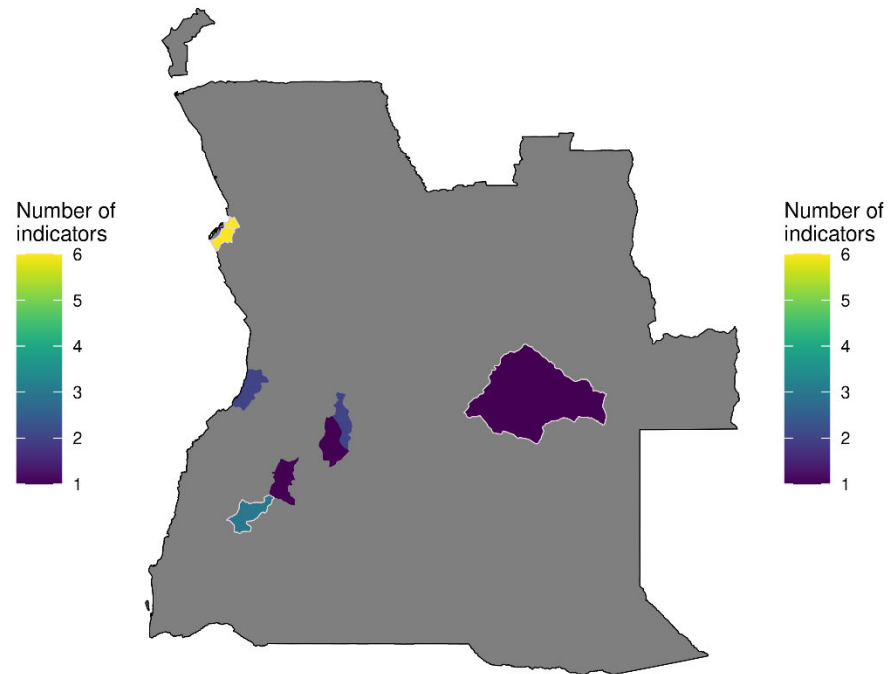

## Supplemental Figure S71: DRC

(A) By prevalence

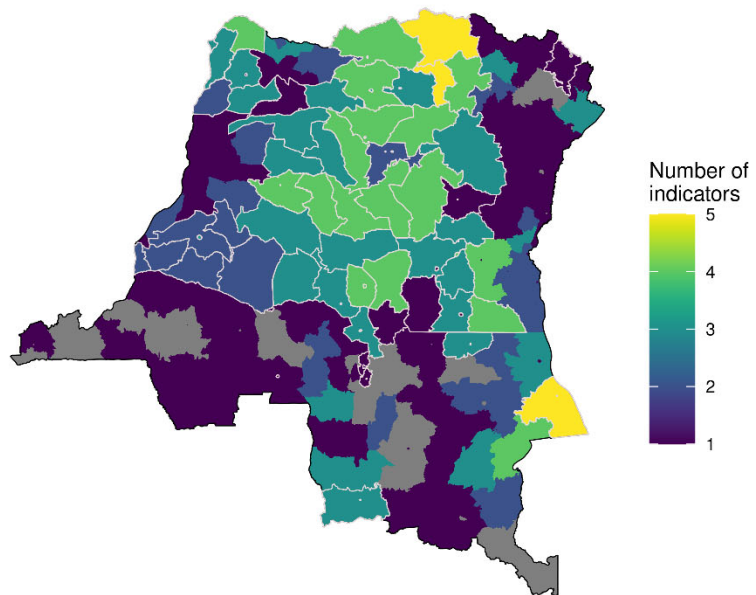

(B) By counts

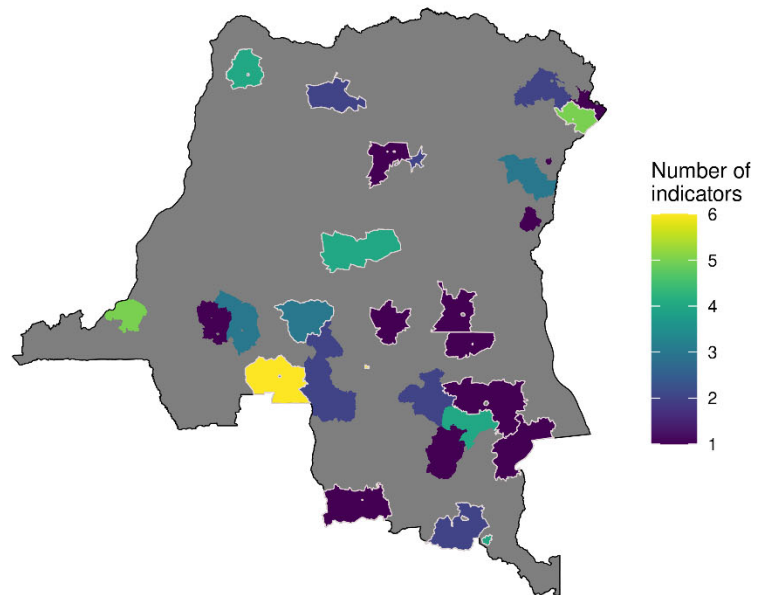

## Supplemental Figure S72: Ethiopia

(A) By prevalence

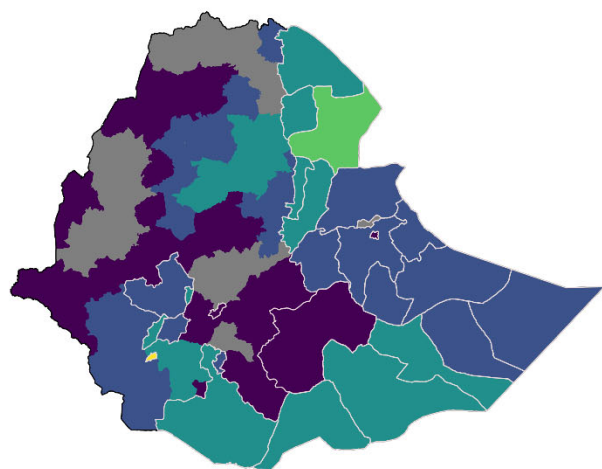

(B) By counts

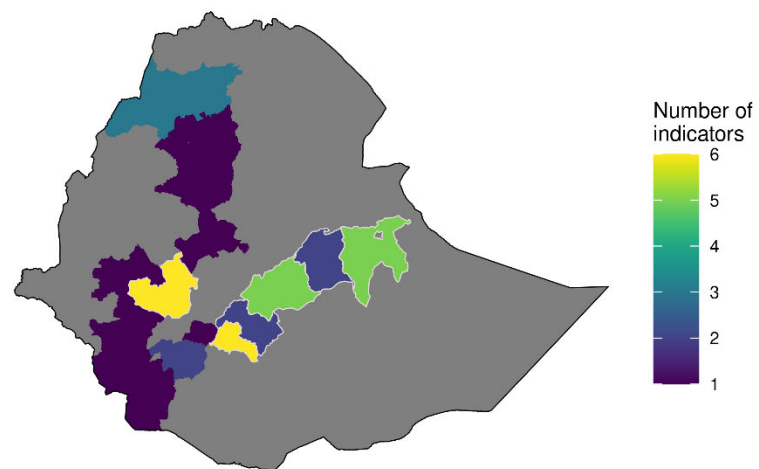

# Supplemental Figure S73: Indonesia

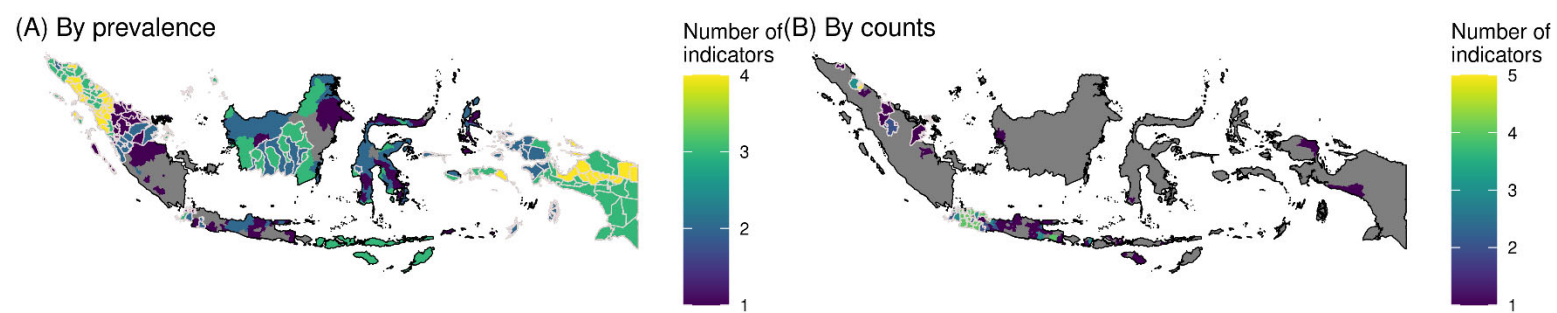

*Supplemental Figures S74–S77: Multinational all quartile overlap by prevalence.*

Multinational overlap no-DTP and each given indicator (U5M, missed ORT, missed ITNs and LF), for all categorization quartiles, based on prevalence. Ranges for population-weighted quartiles across the five example countries combined for no-DTP and children with stunting are delineated in the bivariate color legend (bottom right).

**Supplemental Figure S74: U5M**

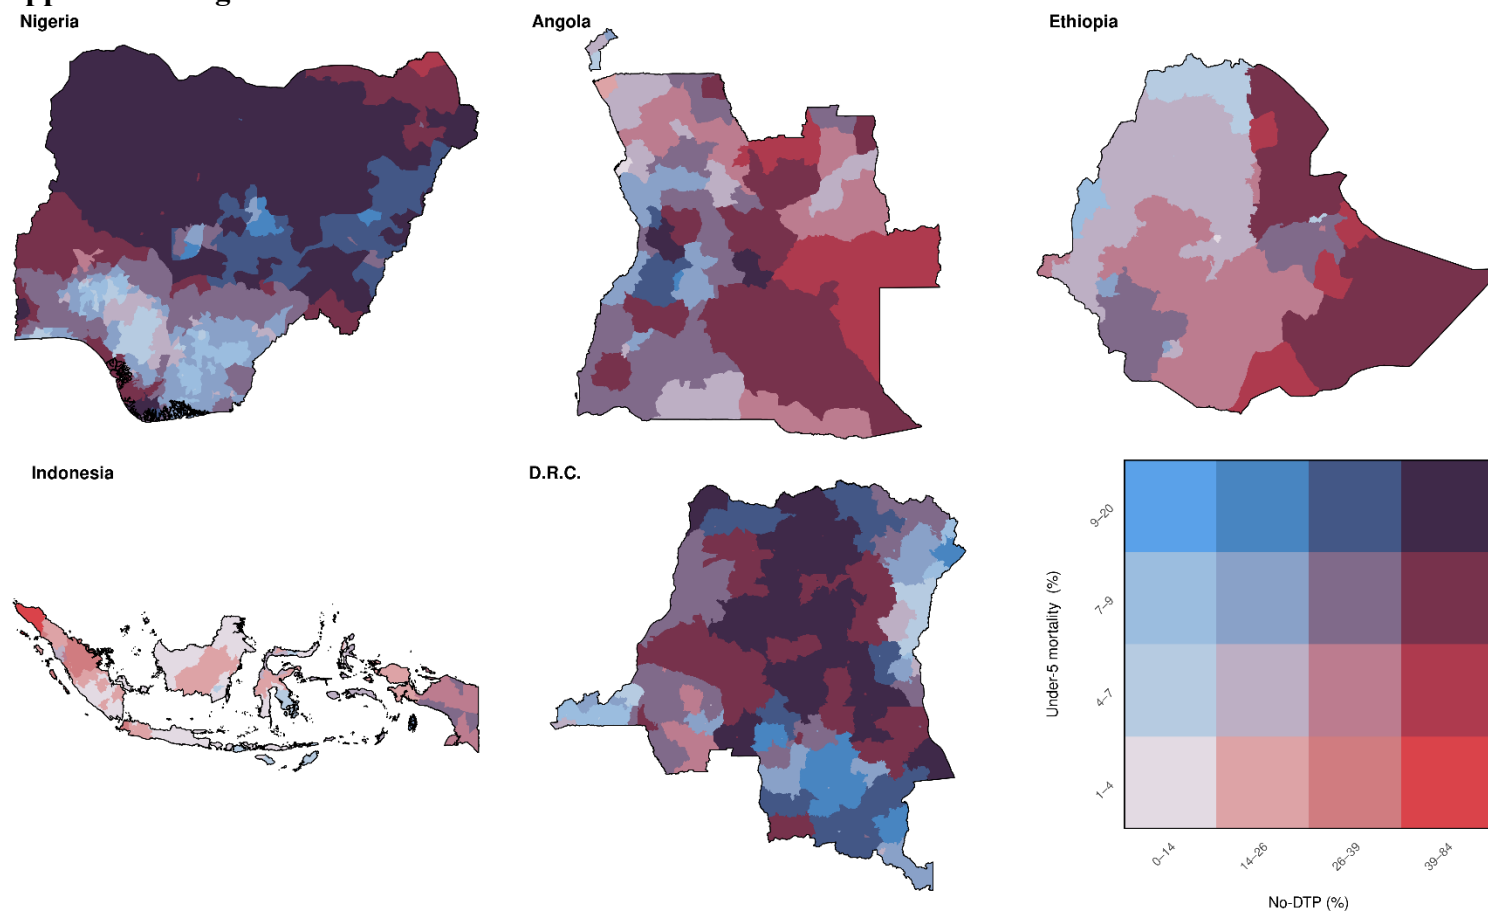

# Supplemental Figure S75: Missed ITNs

Nigeria

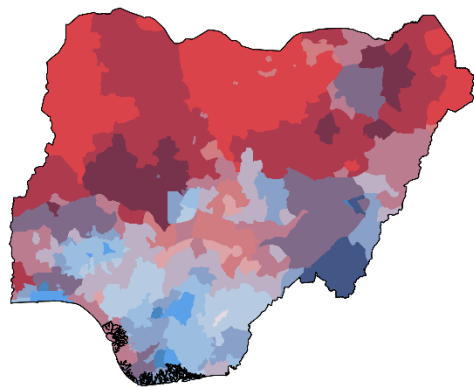

Angola

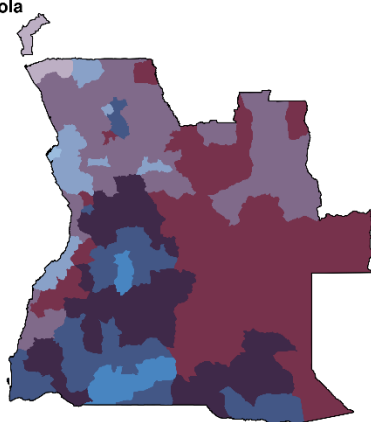

Ethiopia

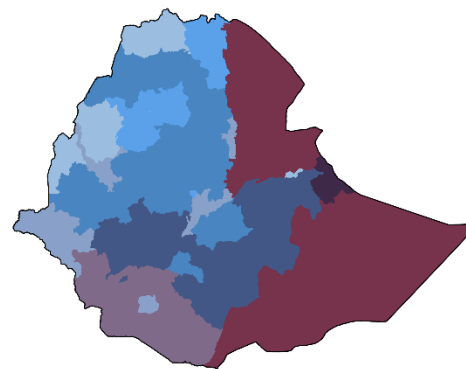

Indonesia

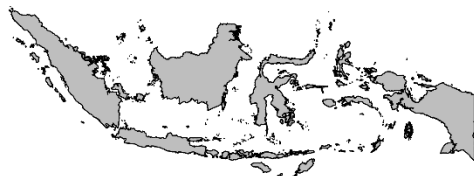

D.R.C.

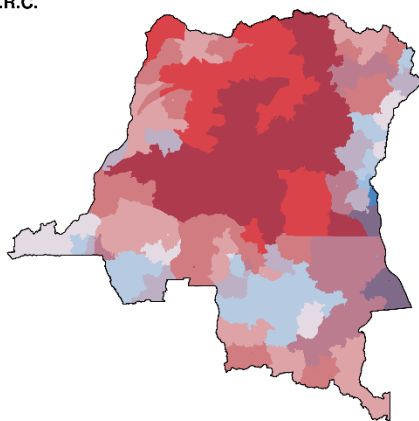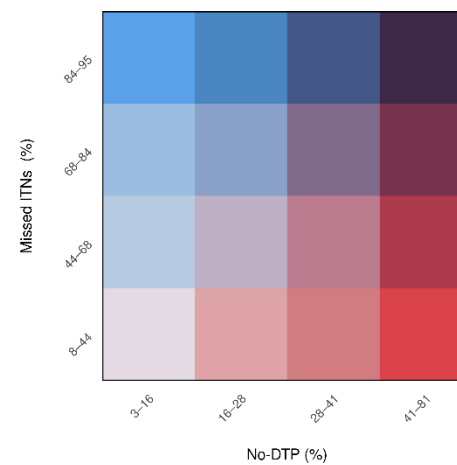

# Supplemental Figure S76: Missed ORT

Nigeria

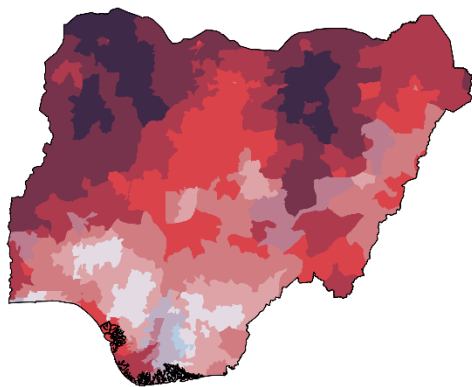

Angola

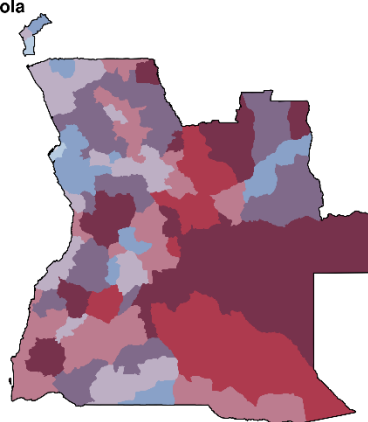

Ethiopia

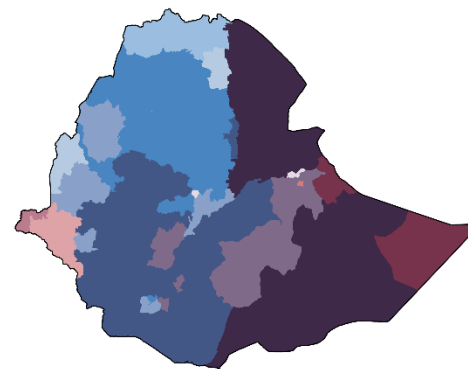

Indonesia

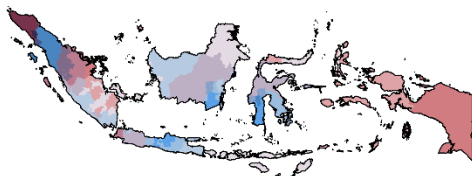

D.R.C.

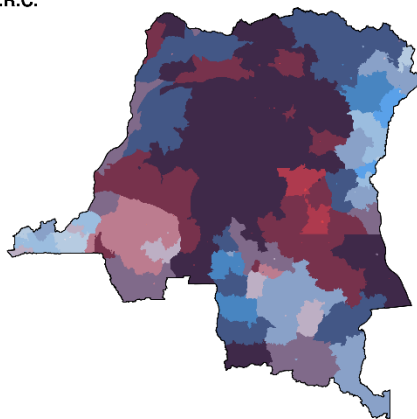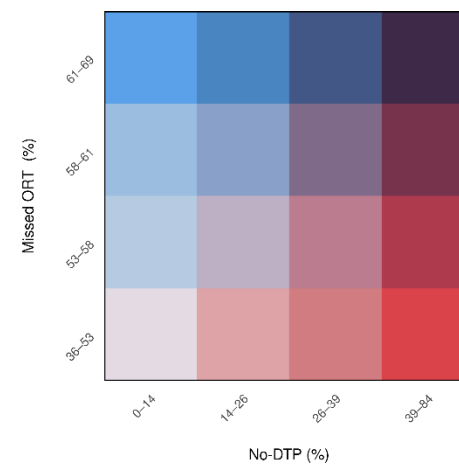

# Supplemental Figure S77: LF

Nigeria

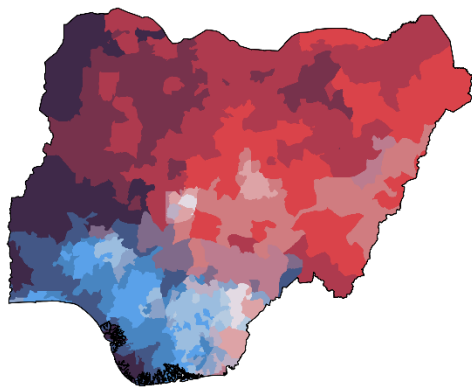

Angola

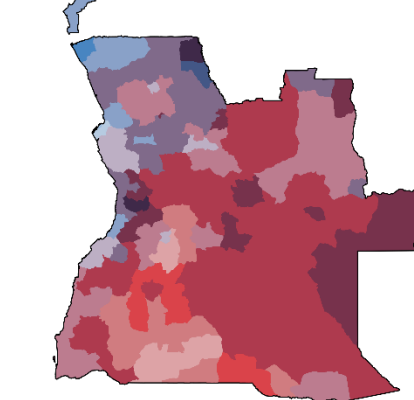

Ethiopia

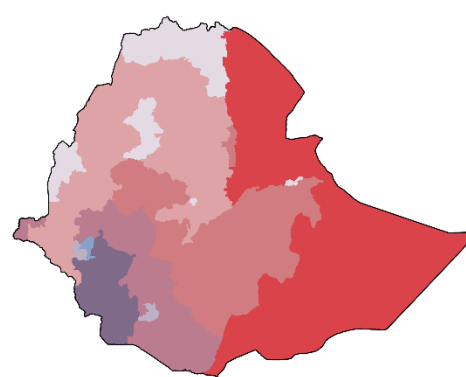

Indonesia

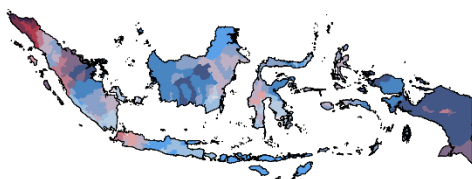

D.R.C.

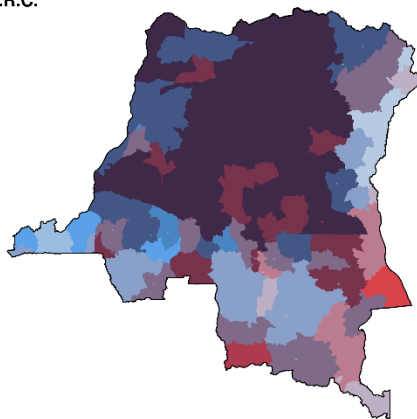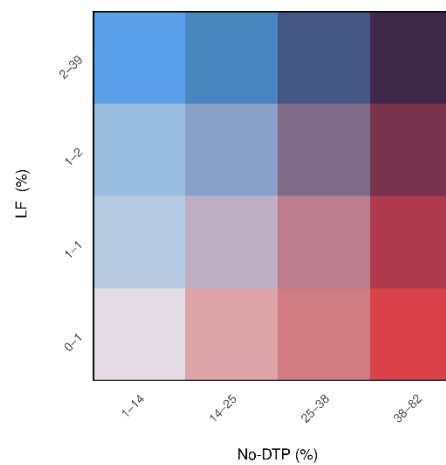

*Supplemental Figures S78–S81: Multinational highest quartile overlap by prevalence.*

Multinational overlap no-DTP and each given indicator (U5M, missed ORT, missed ITNs and LF), for highest quartiles only, based on prevalence. Districts in red are in the highest quartile for no-DTP only, blue are in the highest quartile for the comparator indicator only, and purple are in the highest quartile for both indicators.

**Supplemental Figure S78: U5M**

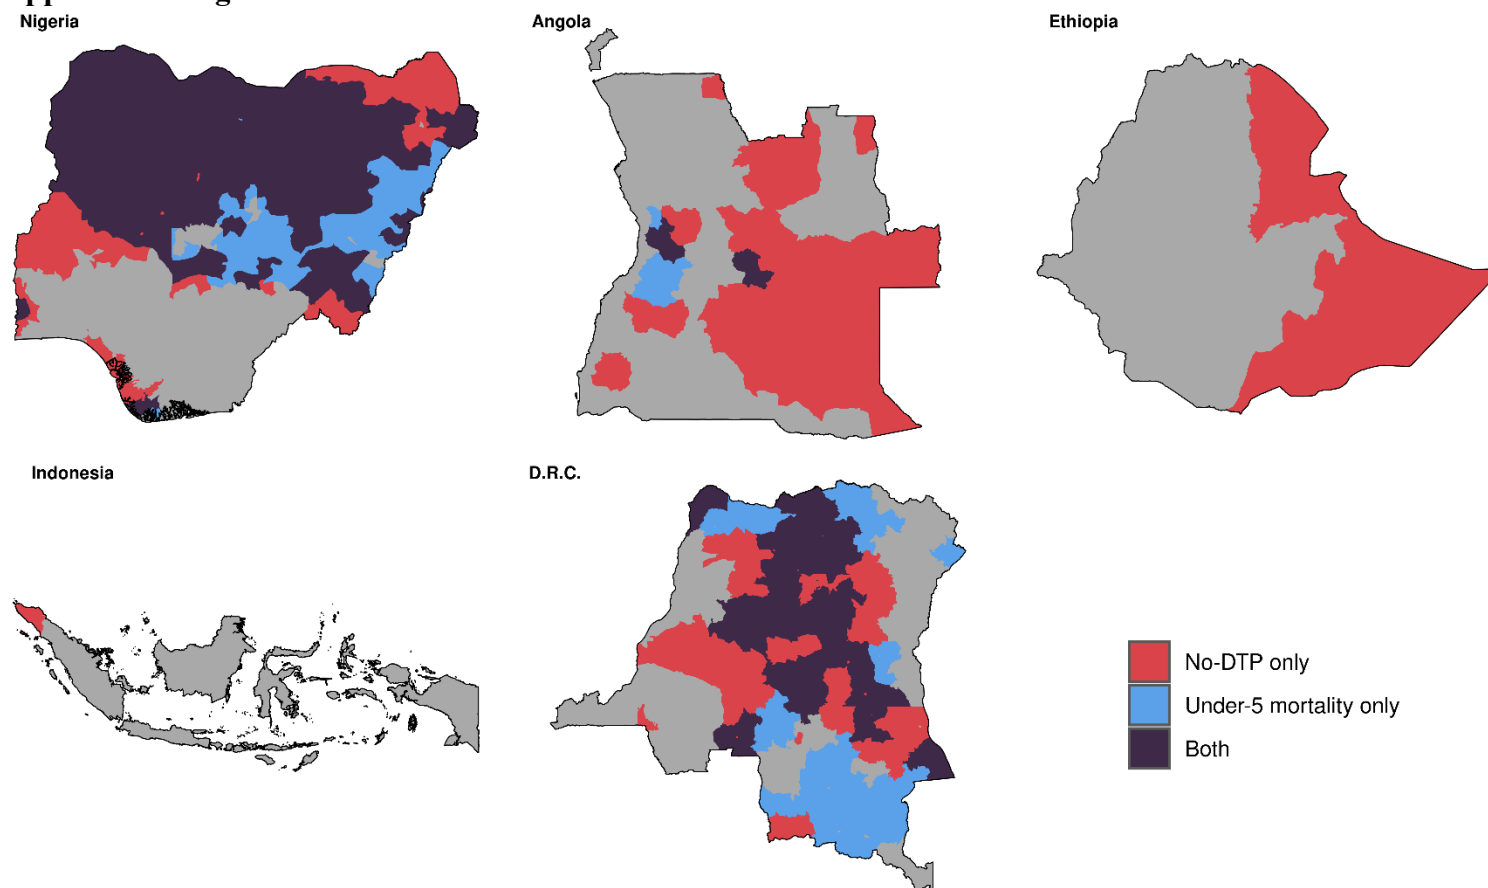

**Supplemental Figure S79: Missed ITNs**

Nigeria

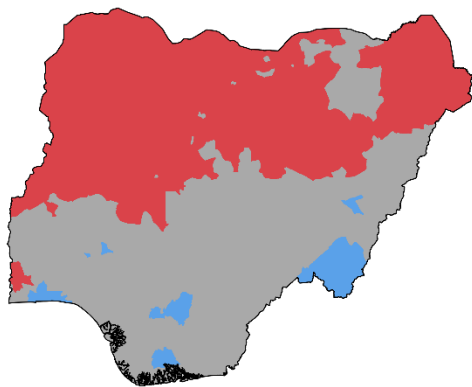

Angola

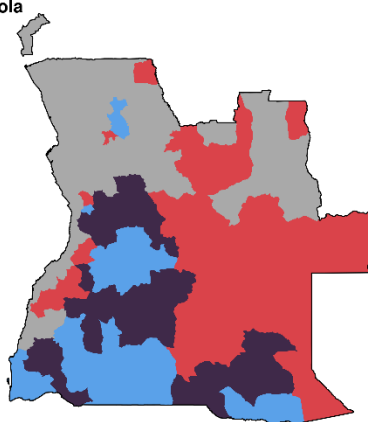

Ethiopia

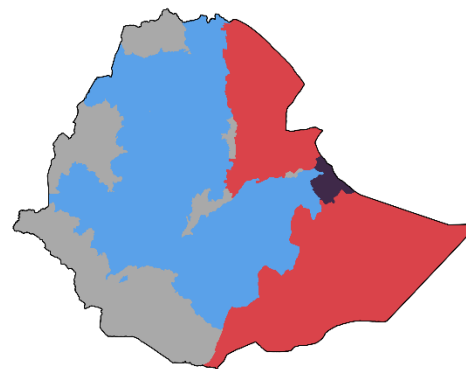

Indonesia

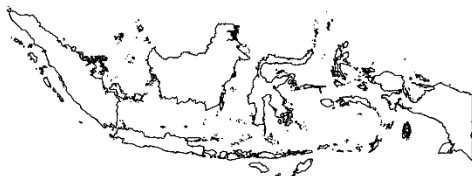

D.R.C.

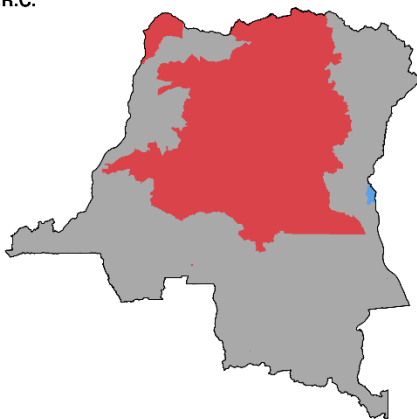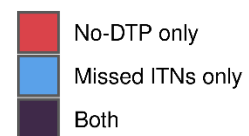

## Supplemental Figure S80: Missed ORT

Nigeria

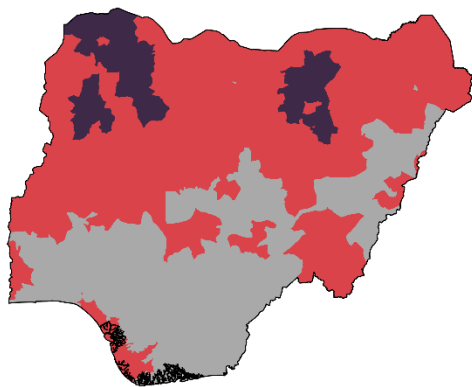

Angola

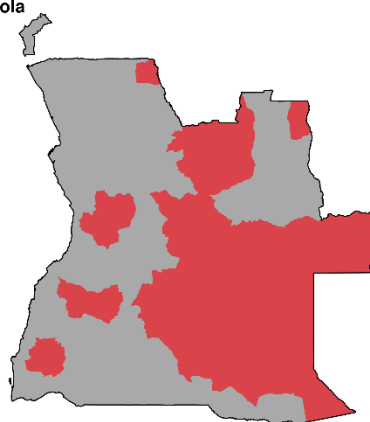

Ethiopia

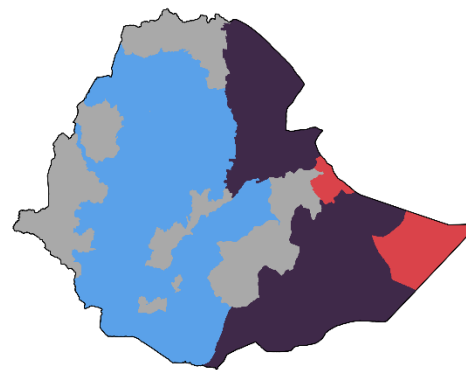

Indonesia

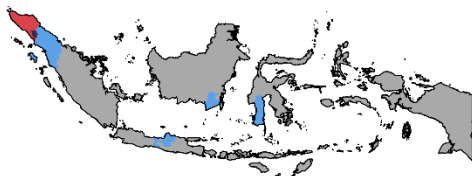

D.R.C.

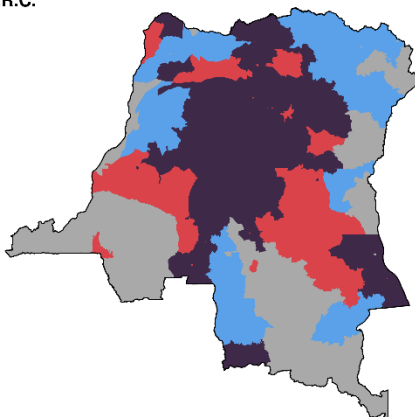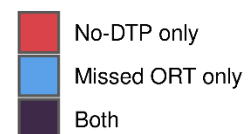

## Supplemental Figure S81: LF

Nigeria

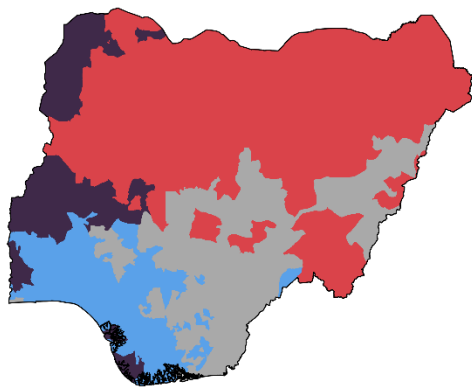

Angola

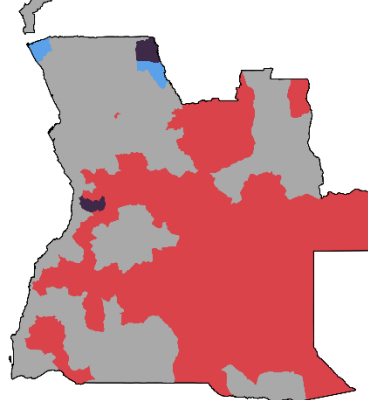

Ethiopia

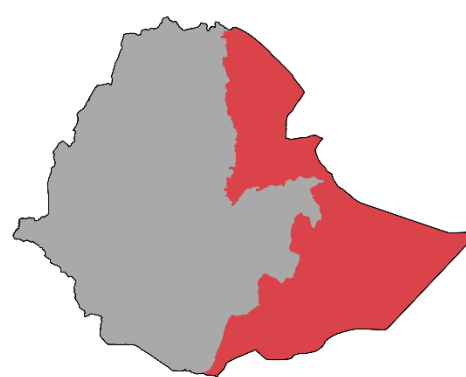

Indonesia

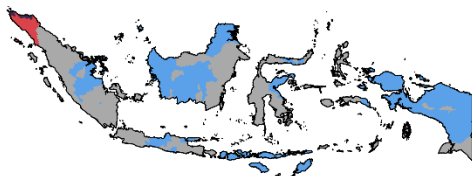

D.R.C.

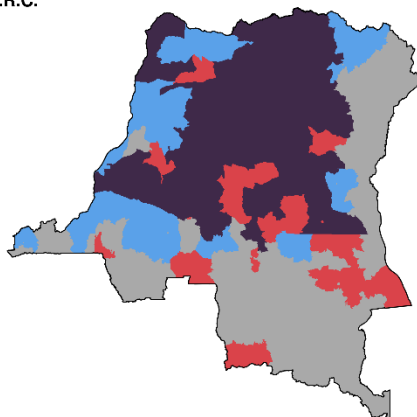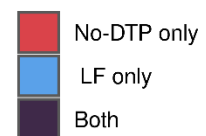

*Supplemental Figures S82–S85: Multinational all quartile overlap by counts.*

Multinational overlap no-DTP and each given indicator (U5M, missed ORT, missed ITNs and LF), for all categorization quartiles, based on counts. Ranges for population-weighted quartiles across the five example countries combined for no-DTP and children with stunting are delineated in the bivariate color legend (bottom right).

**Supplemental Figure S82: U5M**

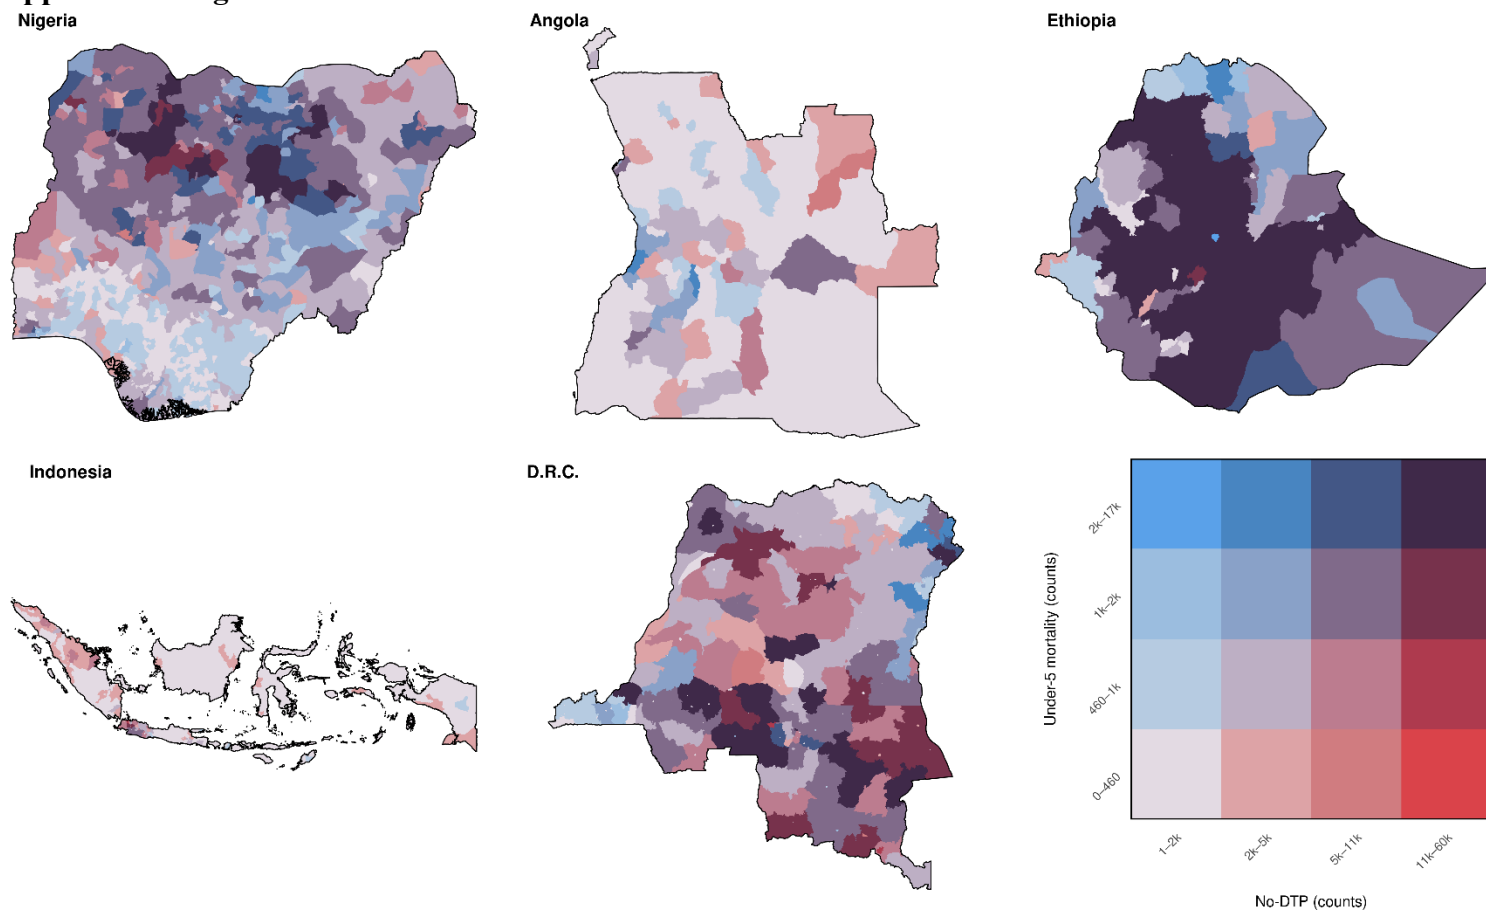

# Supplemental Figure S83: Missed ITNs

Nigeria

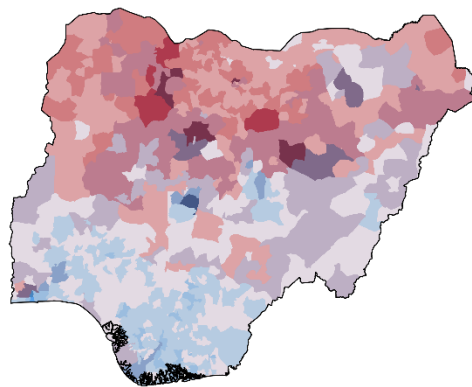

Angola

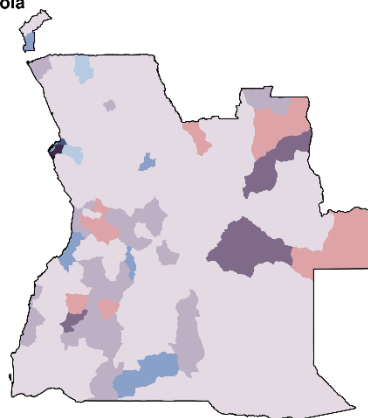

Ethiopia

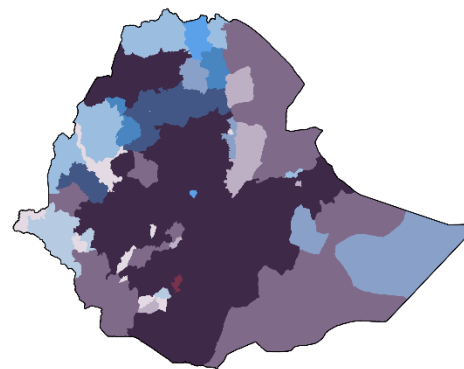

Indonesia

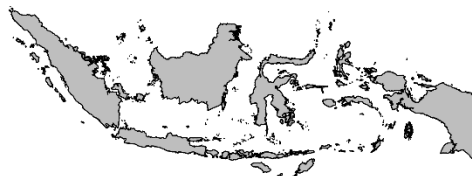

D.R.C.

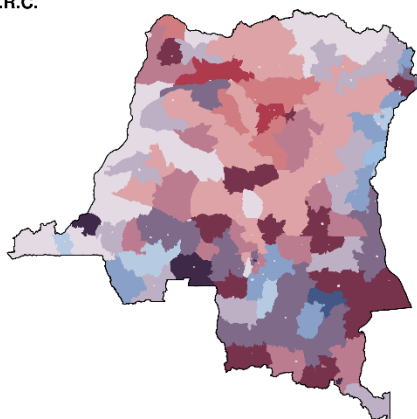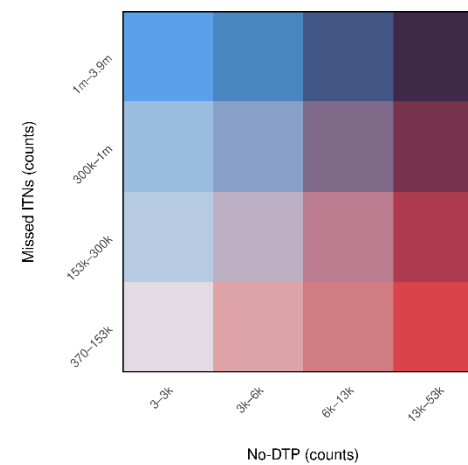

**Supplemental Figure S84: Missed ORT**

**Nigeria**

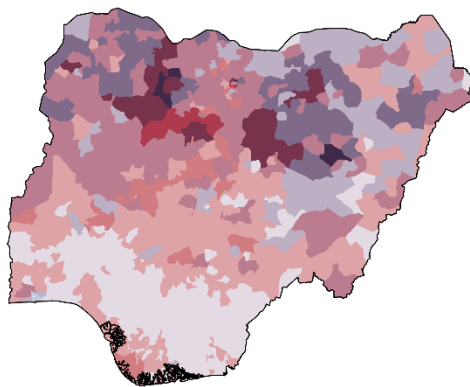

**Angola**

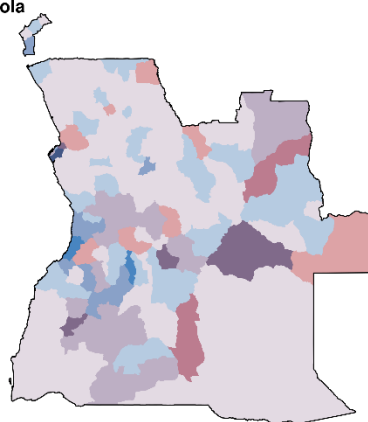

**Ethiopia**

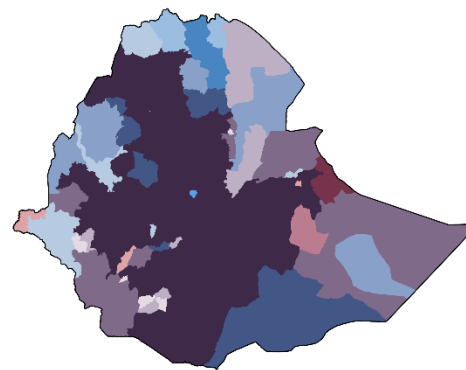

**Indonesia**

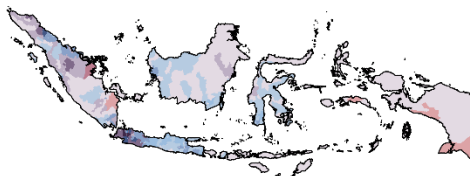

**D.R.C.**

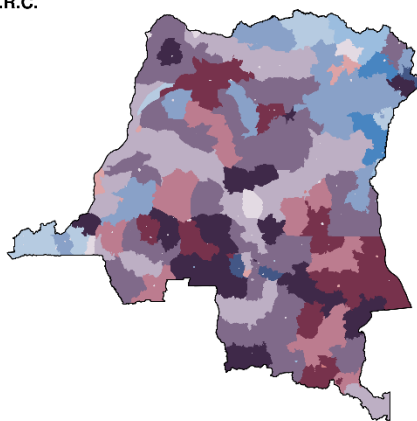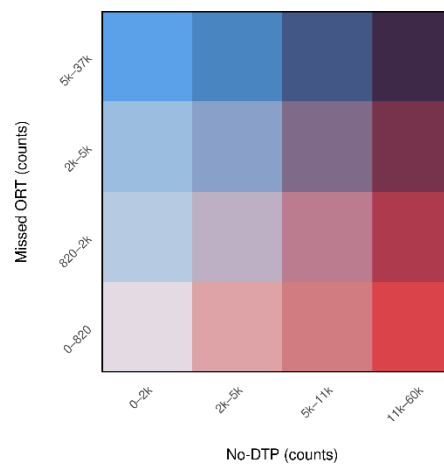

# Supplemental Figure S85: LF

Nigeria

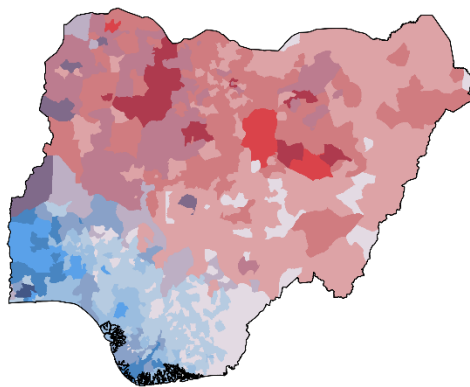

Angola

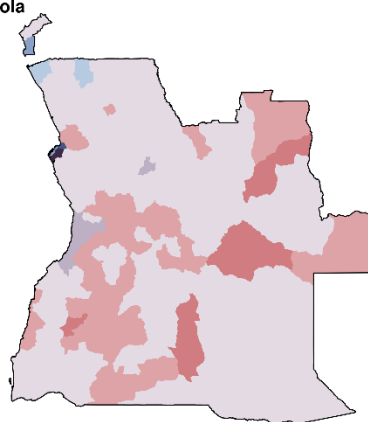

Ethiopia

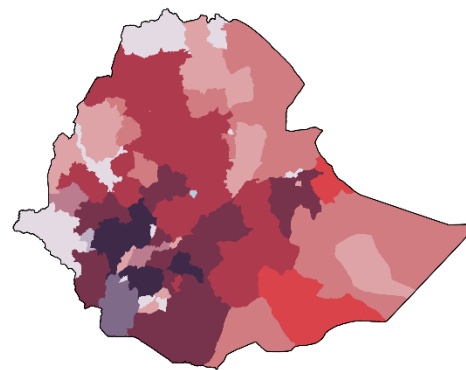

Indonesia

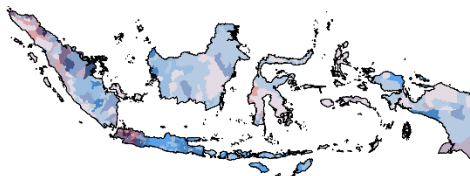

D.R.C.

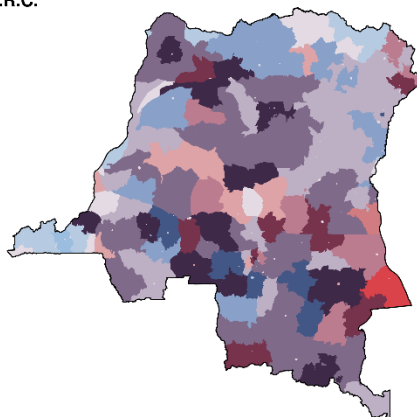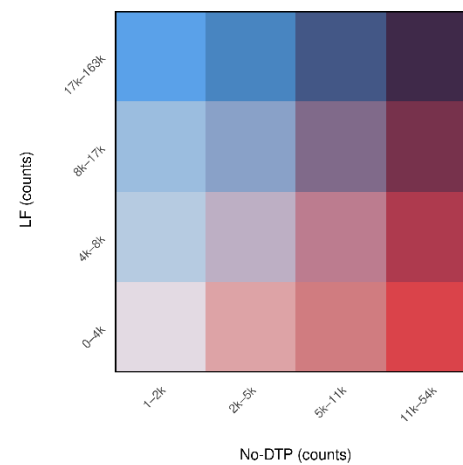

*Supplemental Figures S86–S89: Multinational highest quartile overlap by counts.*

Multinational overlap no-DTP and each given indicator (U5M, missed ORT, missed ITNs and LF), for highest quartiles only, based on counts. Districts in red are in the highest quartile for no-DTP only, blue are in the highest quartile for the comparator indicator only, and purple are in the highest quartile for both indicators.

**Supplemental Figure S86: U5M**

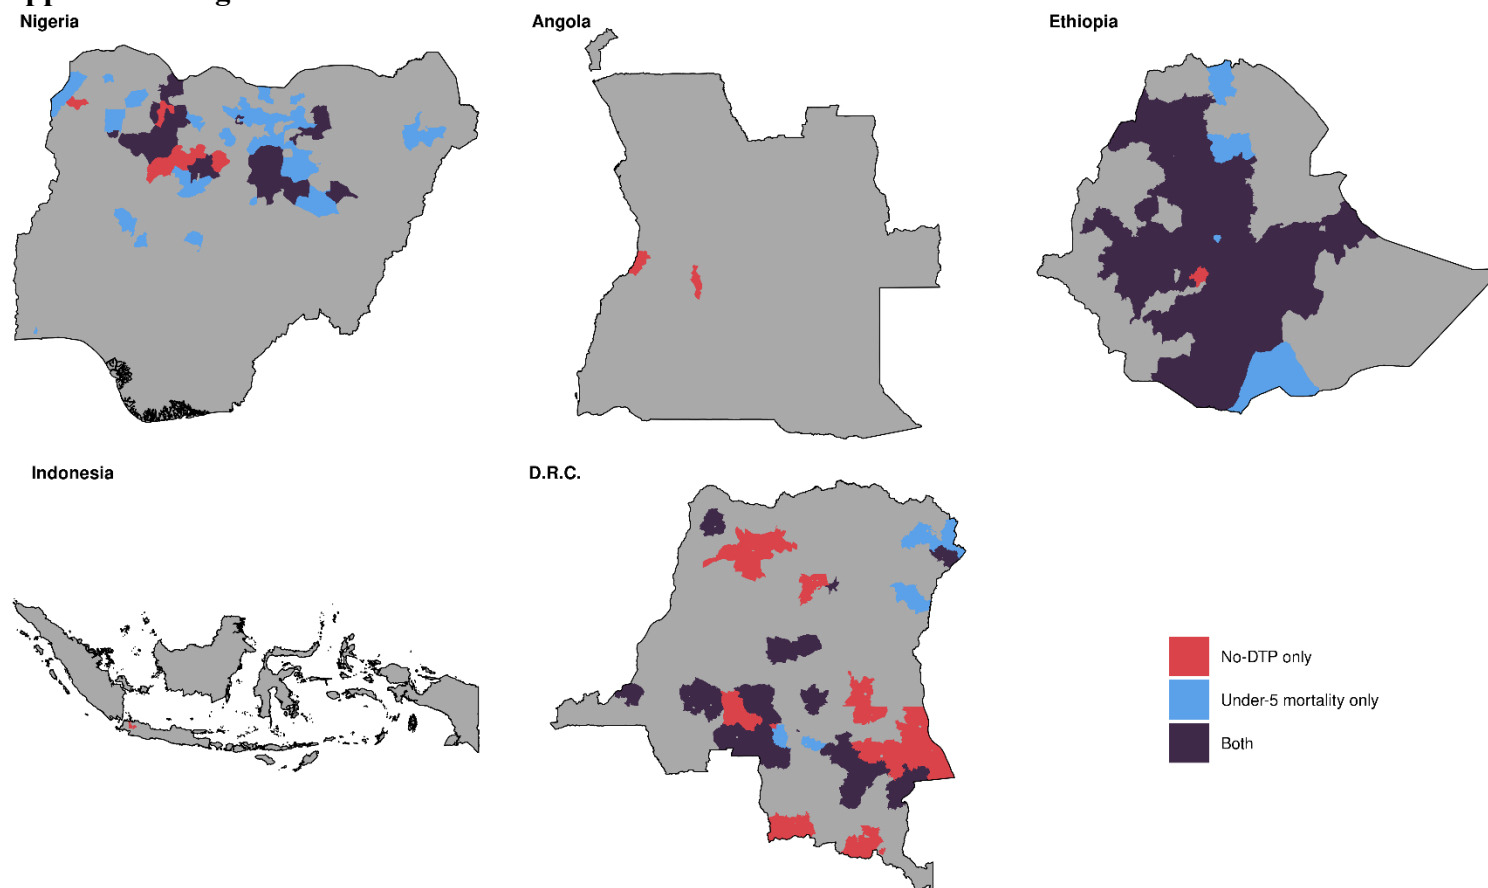

## Supplemental Figure S87: Missed ITNs

Nigeria

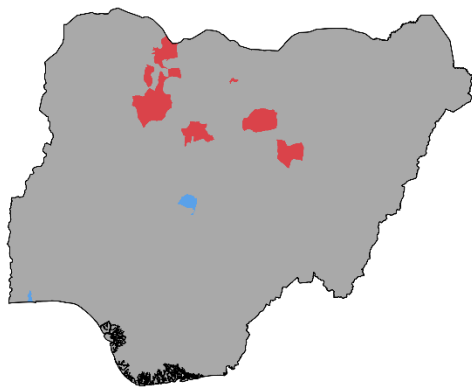

Angola

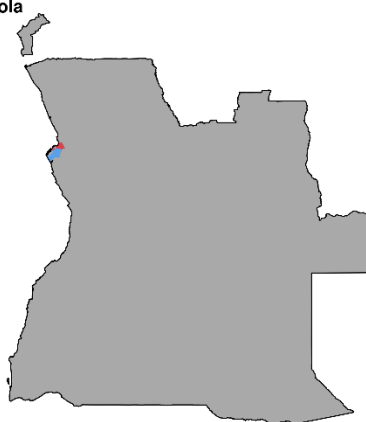

Ethiopia

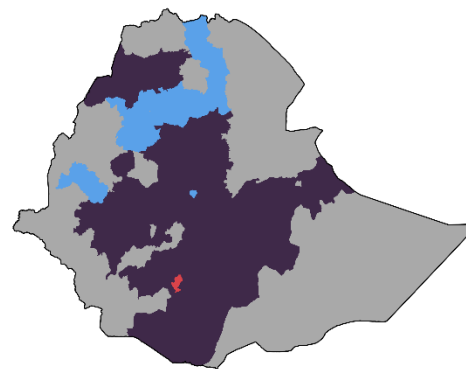

Indonesia



D.R.C.

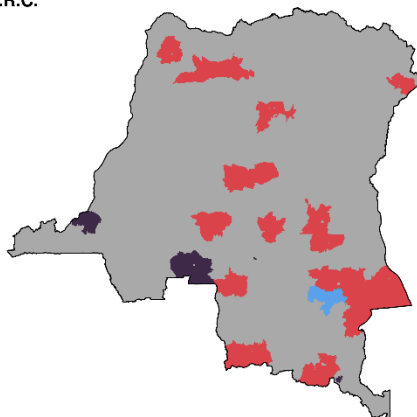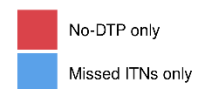

## Supplemental Figure S88: Missed ORT

Nigeria

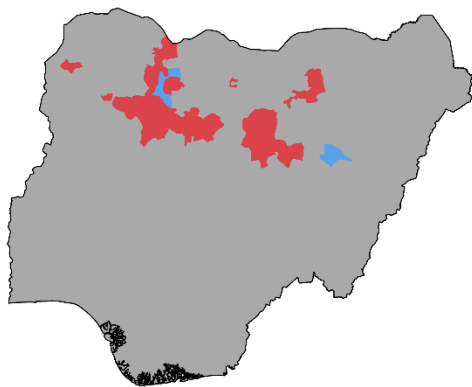

Angola

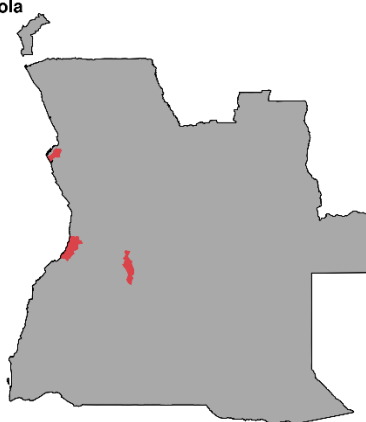

Ethiopia

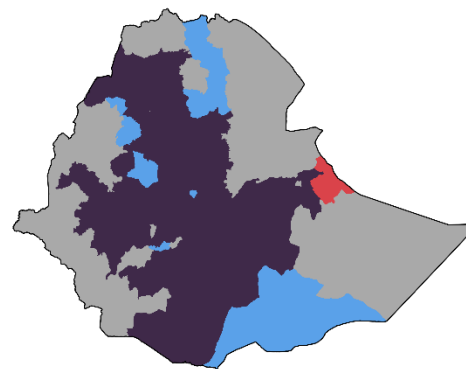

Indonesia

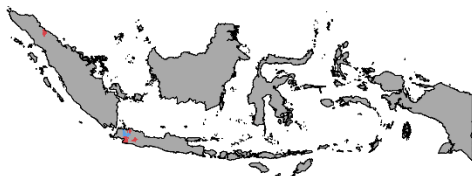

D.R.C.

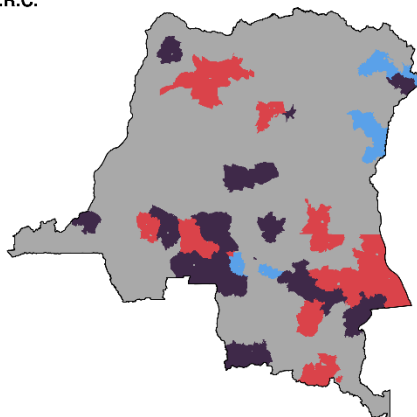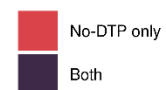

## Supplemental Figure S89: LF

Nigeria

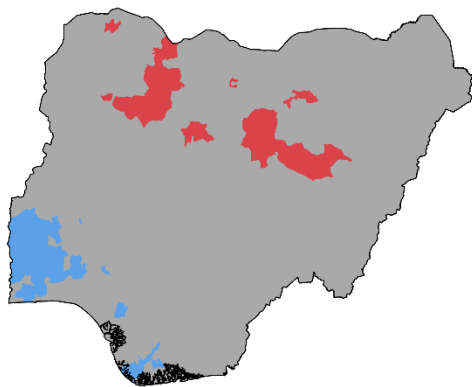

Angola

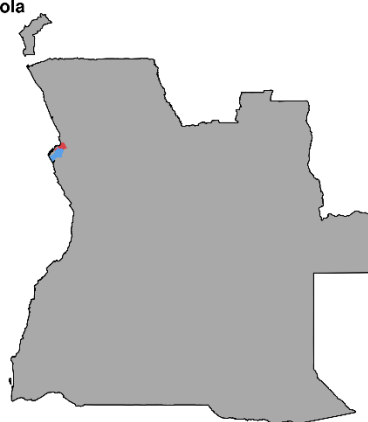

Ethiopia

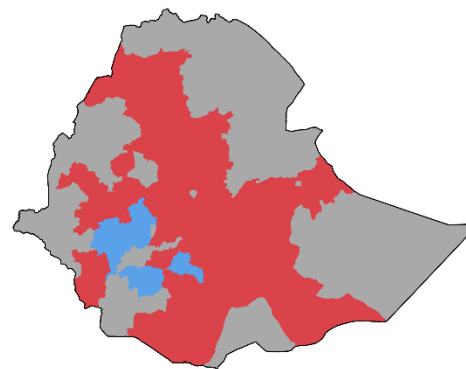

Indonesia

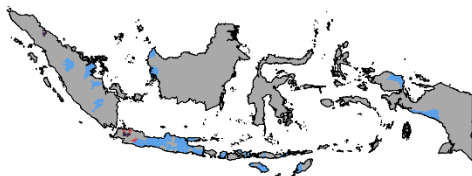

D.R.C.

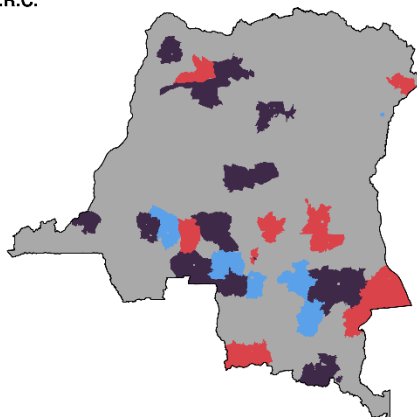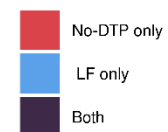

Supplement: Supplementary file 1 [file vaccines-11-00802-s001.zip › vaccines-2255180-supplementary.pdf]
